# Supplementary material for: Assessing the diversity and functional profile of the “microbial proteome” in fermented foods
Source: Royal Society of Chemistry journal article supplement (doi:10.1039/d5fo05039a), 2026-03-26
Supplement: d5fo05039a4.xlsx [file d5fo05039a4.xlsx]

## Sheet: Table4
Supplemental Table 4: Raw, non-normalized abundance of all proteins in each of the 3 replicates of the fermented foods analysed, identified using PEAKS software with an FDR cutoff of 5%.
Source.Name	Accession	Abundance Replicate 1	Abundance Replicate 2	Abundance Replicate 3	Description
PlainYeastBread.csv	WHT_A0A3B6U3W8	13542000000000	1735000000000	9789700000000	Beta-amylase OS=Triticum aestivum OX=4565 GN=CFC21_099966 PE=3 SV=1
PlainYeastBread.csv	WHT_A0A3B5ZP43	23204000000000	32872000000000	20135000000000	Cupin type-1 domain-containing protein OS=Triticum aestivum OX=4565 GN=CFC21_010342 PE=3 SV=1
PlainYeastBread.csv	WHT_P08488	63427000000000	96167000000000	53591000000000	Glutenin high molecular weight subunit 12 OS=Triticum aestivum OX=4565 PE=3 SV=1
PlainYeastBread.csv	WHT_A0A3B6J0P1	5912600000000	7774200000000	5288100000000	Beta-amylase OS=Triticum aestivum OX=4565 GN=CFC21_059911 PE=3 SV=1
PlainYeastBread.csv	WHT_A0A3B6GR96	38553000000000	43815000000000	23439000000000	Bifunctional inhibitor/plant lipid transfer protein/seed storage helical domain-containing protein OS=Triticum aestivum OX=4565 GN=CFC21_046079 PE=3 SV=1
PlainYeastBread.csv	WHT_I6QQ39	8543900000000	11722000000000	6345300000000	Globulin-3A OS=Triticum aestivum OX=4565 GN=Glo-3A PE=2 SV=1
PlainYeastBread.csv	WHT_Q93XQ7	3373600000000	5405200000000	280600000000	Protein disulfide-isomerase OS=Triticum aestivum OX=4565 GN=PDI3 PE=2 SV=1
PlainYeastBread.csv	WHT_P10388	51495000000000	75196000000000	44676000000000	Glutenin high molecular weight subunit DX5 OS=Triticum aestivum OX=4565 GN=GLU-1D-1D PE=3 SV=5
PlainYeastBread.csv	WHT_P27736	9117800000000	15988000000000	7792300000000	Granule-bound starch synthase 1 chloroplastic/amyloplastic OS=Triticum aestivum OX=4565 GN=WAXY PE=1 SV=1
PlainYeastBread.csv	WHT_A0A3B6IJ76	1468500000000	2079900000000	1676500000000	Cupin type-1 domain-containing protein OS=Triticum aestivum OX=4565 GN=CFC21_056115 PE=4 SV=1
PlainYeastBread.csv	CS_P00924	1103000000000	14438000000000	9179600000000	Enolase 1 OS=Saccharomyces cerevisiae (strain ATCC 204508 / S288c) OX=559292 GN=ENO1 PE=1 SV=3
PlainYeastBread.csv	WHT_Q0Q5D4	7183500000000	9222800000000	5877300000000	Globulin 1 OS=Triticum aestivum OX=4565 GN=CFC21_012926 PE=4 SV=1
PlainYeastBread.csv	WHT_A0A3B6JER7	4102400000000	7486900000000	4555800000000	Cupin type-1 domain-containing protein OS=Triticum aestivum OX=4565 GN=CFC21_060131 PE=4 SV=1
PlainYeastBread.csv	WHT_W5GM69	321510000000	102800000000	467140000000	Glyceraldehyde-3-phosphate dehydrogenase OS=Triticum aestivum OX=4565 GN=GAPC6 PE=2 SV=1
PlainYeastBread.csv	BRL_Q84T20	2370000000	132320000000	229730000000	Beta-amylase OS=Hordeum vulgare subsp. vulgare OX=112509 GN=bamy1 PE=2 SV=1
PlainYeastBread.csv	WHT_A0A3B5Z104	24094000000	22368000000	27388000000	Uncharacterized protein OS=Triticum aestivum OX=4565 GN=CFC21_007671 PE=3 SV=1
PlainYeastBread.csv	WHT_A0A3B6T7X8	19835000000000	1992000000000	12373000000000	Bifunctional inhibitor/plant lipid transfer protein/seed storage helical domain-containing protein OS=Triticum aestivum OX=4565 GN=CFC21_106665 PE=4 SV=1
PlainYeastBread.csv	WHT_A0A3B6ILV9	1455700000000	2556100000000	1409800000000	Cupin type-1 domain-containing protein OS=Triticum aestivum OX=4565 GN=CFC21_056114 PE=4 SV=1
PlainYeastBread.csv	WHT_Q4U1A4	3789900000000	538400000000	2578400000000	Dimeric alpha-amylase inhibitor OS=Triticum aestivum OX=4565 GN=CFC21_040030 PE=3 SV=1
PlainYeastBread.csv	WHT_P93693	3131400000000	3722200000000	2787400000000	Serpin-Z1B OS=Triticum aestivum OX=4565 PE=1 SV=1
PlainYeastBread.csv	WHT_A0A3B6JBZ2	350420000000	691630000000	298710000000	Cupin type-1 domain-containing protein OS=Triticum aestivum OX=4565 GN=CFC21_060132 PE=4 SV=1
PlainYeastBread.csv	WHT_A0A3B6QML0	3420500000000	5618100000000	2678600000000	Peptidase A1 domain-containing protein OS=Triticum aestivum OX=4565 GN=CFC21_094402 PE=3 SV=1
PlainYeastBread.csv	WHT_A0A3B6HS11	55148000000	86025000000	49209000000	Heat shock cognate 70 kDa protein OS=Triticum aestivum OX=4565 PE=3 SV=1
PlainYeastBread.csv	CS_P00560	8134500000000	10841000000000	6632100000000	Phosphoglycerate kinase OS=Saccharomyces cerevisiae (strain ATCC 204508 / S288c) OX=559292 GN=PGK1 PE=1 SV=2
PlainYeastBread.csv	WHT_A0A3B5Z5B4		12792000000	8787900000	Glucose-1-phosphate adenylyltransferase OS=Triticum aestivum OX=4565 GN=CFC21_009248 PE=3 SV=1
PlainYeastBread.csv	WHT_A0A3B6JR20	56155000000000	70223000000000	37567000000000	Bifunctional inhibitor/plant lipid transfer protein/seed storage helical domain-containing protein OS=Triticum aestivum OX=4565 GN=CFC21_063275 PE=3 SV=1
PlainYeastBread.csv	BRL_A0A8I7BBR7	143640000000	616300000	0	Protein disulfide-isomerase OS=Hordeum vulgare subsp. vulgare OX=112509 PE=3 SV=1
PlainYeastBread.csv	CS_P00360	1165100000000	1110100000000	818180000000	Glyceraldehyde-3-phosphate dehydrogenase 1 OS=Saccharomyces cerevisiae (strain ATCC 204508 / S288c) OX=559292 GN=TDH1 PE=1 SV=3
PlainYeastBread.csv	CS_P00358	6092900000000	10347000000000	5498800000000	Glyceraldehyde-3-phosphate dehydrogenase 2 OS=Saccharomyces cerevisiae (strain ATCC 204508 / S288c) OX=559292 GN=TDH2 PE=1 SV=3
PlainYeastBread.csv	WHT_Q0Q5D9	3590600000000	5045300000000	380900000000	Globulin 1 OS=Triticum aestivum OX=4565 GN=CFC21_008030 PE=4 SV=1
PlainYeastBread.csv	WHT_P01083	4389000000000	47694000000000	26713000000000	Alpha-amylase inhibitor 0.28 OS=Triticum aestivum OX=4565 GN=IMA1 PE=1 SV=3
PlainYeastBread.csv	WHT_A0A3B6I3X0	2627500000	0	0	Tr-type G domain-containing protein OS=Triticum aestivum OX=4565 PE=4 SV=1
PlainYeastBread.csv	WHT_Q41593	629570000000	376040000000	702580000000	Serpin-Z1A OS=Triticum aestivum OX=4565 GN=WZCI PE=1 SV=1
PlainYeastBread.csv	CS_P06169	362700000000	5311500000000	2815700000000	Pyruvate decarboxylase isozyme 1 OS=Saccharomyces cerevisiae (strain ATCC 204508 / S288c) OX=559292 GN=PDC1 PE=1 SV=7
PlainYeastBread.csv	WHT_P10386	8266300000	9643200000	2942800000	Glutenin low molecular weight subunit 1D1 OS=Triticum aestivum OX=4565 PE=2 SV=1
PlainYeastBread.csv	WHT_A0A3B5Y1F9	92260000000	1872200000000	855860000000	Pyruvate phosphate dikinase OS=Triticum aestivum OX=4565 PE=3 SV=1
PlainYeastBread.csv	WHT_P16159	37543000000000	37643000000000	22011000000000	Alpha-amylase/trypsin inhibitor CM16 OS=Triticum aestivum OX=4565 PE=1 SV=1
PlainYeastBread.csv	WHT_Q84QI5	17636000000000	26196000000000	14684000000000	GSP-1 Grain Softness Protein OS=Triticum aestivum OX=4565 GN=Gsp-1 PE=4 SV=1
PlainYeastBread.csv	WHT_W5D003	3008100000000	2873600000000	2045400000000	Bifunctional inhibitor/plant lipid transfer protein/seed storage helical domain-containing protein OS=Triticum aestivum OX=4565 GN=CFC21_040029 PE=3 SV=1
PlainYeastBread.csv	WHT_Q9ST58	1121500000000	1787800000000	1512100000000	Serpin-Z1C OS=Triticum aestivum OX=4565 PE=1 SV=1
PlainYeastBread.csv	WHT_A0A3B5Z3G6	337180000000	410430000000	288990000000	Uncharacterized protein OS=Triticum aestivum OX=4565 GN=CFC21_008651 PE=4 SV=1
PlainYeastBread.csv	WHT_A0A1D5WMF1	36450000000	432190000000	245840000000	Fructose-bisphosphate aldolase OS=Triticum aestivum OX=4565 GN=FBA14 PE=3 SV=1
PlainYeastBread.csv	WHT_A0A3B6A0K5	113010000000	30150000000	166030000000	Uncharacterized protein OS=Triticum aestivum OX=4565 GN=CFC21_013530 PE=4 SV=1
PlainYeastBread.csv	CS_P00549	3784500000000	4766300000000	3089900000000	Pyruvate kinase 1 OS=Saccharomyces cerevisiae (strain ATCC 204508 / S288c) OX=559292 GN=CDC19 PE=1 SV=2
PlainYeastBread.csv	WHT_A0A3B6JQP1	23574000000000	26607000000000	16406000000000	Bifunctional inhibitor/plant lipid transfer protein/seed storage helical domain-containing protein OS=Triticum aestivum OX=4565 GN=CFC21_063274 PE=3 SV=1
PlainYeastBread.csv	CS_P10591	1447600000000	1879100000000	1283400000000	Heat shock protein SSA1 OS=Saccharomyces cerevisiae (strain ATCC 204508 / S288c) OX=559292 GN=SSA1 PE=1 SV=4
PlainYeastBread.csv	CS_Q07653	510070000000	650350000000	564630000000	Protein HBT1 OS=Saccharomyces cerevisiae (strain ATCC 204508 / S288c) OX=559292 GN=HBT1 PE=1 SV=1
PlainYeastBread.csv	WHT_P16851	30291000000000	4284000000000	20029000000000	Alpha-amylase/trypsin inhibitor CM2 OS=Triticum aestivum OX=4565 PE=1 SV=2
PlainYeastBread.csv	WHT_A0A3B5Y5E3	21646000000	140710000000	140120000000	Uncharacterized protein OS=Triticum aestivum OX=4565 PE=4 SV=1
PlainYeastBread.csv	WHT_A0A3B5YPZ7	4556400000000	4424700000000	2918800000000	Bifunctional inhibitor/plant lipid transfer protein/seed storage helical domain-containing protein OS=Triticum aestivum OX=4565 GN=CFC21_004713 PE=4 SV=1
PlainYeastBread.csv	WHT_A0A3B6JCE1	45537000000	101240000000	43062000000	Ribonuclease OS=Triticum aestivum OX=4565 GN=CFC21_060257 PE=4 SV=1
PlainYeastBread.csv	WHT_A0A3B6RKE8	530660000000	847950000000	416530000000	Glyceraldehyde-3-phosphate dehydrogenase OS=Triticum aestivum OX=4565 GN=CFC21_098179 PE=3 SV=1
PlainYeastBread.csv	WHT_A0A3B6LF92	156810000000	170620000000	113080000000	phosphopyruvate hydratase OS=Triticum aestivum OX=4565 GN=CFC21_075564 PE=3 SV=1
PlainYeastBread.csv	CS_P02994	224400000000	2776300000000	1696200000000	Elongation factor 1-alpha OS=Saccharomyces cerevisiae (strain ATCC 204508 / S288c) OX=559292 GN=TEF2 PE=1 SV=1
PlainYeastBread.csv	WHT_A0A3B5YT90	599570000000	957490000000	570530000000	alanine transaminase OS=Triticum aestivum OX=4565 GN=CFC21_005676 PE=3 SV=1
PlainYeastBread.csv	WHT_Q43659	506300000000	8714500000000	4738200000000	15kDa grain softness protein OS=Triticum aestivum OX=4565 GN=GSP-1b PE=2 SV=1
PlainYeastBread.csv	BRL_A0A8I6WSD4	646130000000	1057500000000	539350000000	Sucrose synthase OS=Hordeum vulgare subsp. vulgare OX=112509 PE=3 SV=1
PlainYeastBread.csv	WHT_Q03033	1787200000000	265800000000	1416200000000	Elongation factor 1-alpha OS=Triticum aestivum OX=4565 GN=TEF1 PE=2 SV=1
PlainYeastBread.csv	WHT_P16850	9899500000000	8727900000000	5129100000000	Alpha-amylase/trypsin inhibitor CM1 OS=Triticum aestivum OX=4565 PE=1 SV=1
PlainYeastBread.csv	WHT_A0A3B6D8Z5	639080000000	975870000000	736080000000	Sucrose synthase OS=Triticum aestivum OX=4565 GN=CFC21_028759 PE=3 SV=1
PlainYeastBread.csv	CS_P46367	1534900000000	2386400000000	1290300000000	Potassium-activated aldehyde dehydrogenase mitochondrial OS=Saccharomyces cerevisiae (strain ATCC 204508 / S288c) OX=559292 GN=ALD4 PE=1 SV=2
PlainYeastBread.csv	WHT_P93692	2620800000000	2760800000000	2470800000000	Serpin-Z2B OS=Triticum aestivum OX=4565 PE=1 SV=1
PlainYeastBread.csv	WHT_A0A3B6SMQ1	0	14113000000	11279000000	Glyceraldehyde 3-phosphate dehydrogenase NAD(P) binding domain-containing protein OS=Triticum aestivum OX=4565 GN=CFC21_103468 PE=3 SV=1
PlainYeastBread.csv	SOY_A0A0R0FH00	0			Uncharacterized protein OS=Glycine max OX=3847 GN=100787543 PE=3 SV=1
PlainYeastBread.csv	WHT_A0A3B6NJT9	581750000000	956480000000	526550000000	Uncharacterized protein OS=Triticum aestivum OX=4565 GN=CFC21_081785 PE=3 SV=1
PlainYeastBread.csv	BRL_A0A8I6XR85		1479000000	3650300000	Heat shock cognate 70 kDa protein OS=Hordeum vulgare subsp. vulgare OX=112509 PE=3 SV=1
PlainYeastBread.csv	WHT_P33432	12837000000000	1555000000000	12996000000000	Puroindoline-A OS=Triticum aestivum OX=4565 GN=PINA PE=1 SV=2
PlainYeastBread.csv	WHT_A0A3B6TB41	0	78023000000	36973000000	Sucrose synthase OS=Triticum aestivum OX=4565 GN=CFC21_107997 PE=3 SV=1
PlainYeastBread.csv	CS_P40150	553640000000	1197800000000	518660000000	Ribosome-associated molecular chaperone SSB2 OS=Saccharomyces cerevisiae (strain ATCC 204508 / S288c) OX=559292 GN=SSB2 PE=1 SV=2
PlainYeastBread.csv	WHT_A0A3B6NM79	509950000000	814290000000	34730000000	Endoglucanase OS=Triticum aestivum OX=4565 GN=CFC21_082325 PE=3 SV=1
PlainYeastBread.csv	CS_P32324	803370000000	1096100000000	579960000000	Elongation factor 2 OS=Saccharomyces cerevisiae (strain ATCC 204508 / S288c) OX=559292 GN=EFT2 PE=1 SV=1
PlainYeastBread.csv	WHT_A0A3B6RM24	214880000000	623820000000	266970000000	Elongation factor 1-gamma 2 OS=Triticum aestivum OX=4565 PE=4 SV=1
PlainYeastBread.csv	CS_P14540	2438300000000	3490600000000	2088900000000	Fructose-bisphosphate aldolase OS=Saccharomyces cerevisiae (strain ATCC 204508 / S288c) OX=559292 GN=FBA1 PE=1 SV=3
PlainYeastBread.csv	WHT_A0A3B5ZSR0	36690000000	97510000000	552780000000	Malate dehydrogenase OS=Triticum aestivum OX=4565 PE=3 SV=1
PlainYeastBread.csv	WHT_A0A3B6KNF4	3304900000000	4028500000000	2277300000000	Cupin type-1 domain-containing protein OS=Triticum aestivum OX=4565 GN=CFC21_068117 PE=4 SV=1
PlainYeastBread.csv	WHT_A0A3B6LUV8	3766400000000	4404100000000	2641100000000	Cupin type-1 domain-containing protein OS=Triticum aestivum OX=4565 GN=CFC21_073917 PE=4 SV=1
PlainYeastBread.csv	BRL_A0A8I7B6P8			10834000000	Ribonuclease OS=Hordeum vulgare subsp. vulgare OX=112509 PE=4 SV=1
PlainYeastBread.csv	WHT_A0A3B6RB62	1720800000000	2368400000000	1260400000000	Bifunctional inhibitor/plant lipid transfer protein/seed storage helical domain-containing protein OS=Triticum aestivum OX=4565 GN=CFC21_095310 PE=4 SV=1
PlainYeastBread.csv	WHT_Q4Z8L8	1269600000000	1797200000000	901830000000	chitinase OS=Triticum aestivum OX=4565 GN=CFC21_100677 PE=4 SV=1
PlainYeastBread.csv	CS_P04806	425480000000	497930000000	357060000000	Hexokinase-1 OS=Saccharomyces cerevisiae (strain ATCC 204508 / S288c) OX=559292 GN=HXK1 PE=1 SV=2
PlainYeastBread.csv	WHT_D6QZM5	5482600000000	8949300000000	3802900000000	Avenin-like b8 OS=Triticum aestivum OX=4565 PE=3 SV=1
PlainYeastBread.csv	BRL_M0Y9X7	349910000000	396370000000	214920000000	Elongation factor 1-alpha OS=Hordeum vulgare subsp. vulgare OX=112509 PE=3 SV=1
PlainYeastBread.csv	WHT_B6UKM9	2951200000000	5246100000000	2886600000000	Gamma gliadin-A3 OS=Triticum aestivum OX=4565 GN=ll908 PE=2 SV=1
PlainYeastBread.csv	WHT_Q5BHT9	1251200000000	2954600000000	1959800000000	GSP-1 Grain Softness Protein OS=Triticum aestivum OX=4565 GN=Gsp1A PE=4 SV=1
PlainYeastBread.csv	WHT_P30523	33975000000	147560000000	6934000000	Glucose-1-phosphate adenylyltransferase small subunit chloroplastic/amyloplastic OS=Triticum aestivum OX=4565 GN=AGP-S PE=2 SV=1
PlainYeastBread.csv	CS_P15992	2140100000000	2452400000000	154700000000	Heat shock protein 26 OS=Saccharomyces cerevisiae (strain ATCC 204508 / S288c) OX=559292 GN=HSP26 PE=1 SV=3
PlainYeastBread.csv	WHT_A0A3B6RT04	48010000000	88310000000	367840000000	1 4-alpha-glucan branching enzyme OS=Triticum aestivum OX=4565 GN=CFC21_100687 PE=3 SV=1
PlainYeastBread.csv	WHT_A0A3B6KQI7	223650000000	207210000000	213330000000	rRNA N-glycosylase OS=Triticum aestivum OX=4565 GN=CFC21_068556 PE=3 SV=1
PlainYeastBread.csv	CS_P22943	2698200000000	4083800000000	3467400000000	12 kDa heat shock protein OS=Saccharomyces cerevisiae (strain ATCC 204508 / S288c) OX=559292 GN=HSP12 PE=1 SV=1
PlainYeastBread.csv	WHT_A0A3B6MP06	23975000000	57703000000	39153000000	2-isopropylmalate synthase OS=Triticum aestivum OX=4565 GN=CFC21_076849 PE=3 SV=1
PlainYeastBread.csv	CS_P19414	1000200000000	1668400000000	812150000000	Aconitate hydratase mitochondrial OS=Saccharomyces cerevisiae (strain ATCC 204508 / S288c) OX=559292 GN=ACO1 PE=1 SV=2
PlainYeastBread.csv	WHT_A0A3B5XTA4	3394000000	134610000000	19517000000	Bifunctional inhibitor/plant lipid transfer protein/seed storage helical domain-containing protein OS=Triticum aestivum OX=4565 PE=4 SV=1
PlainYeastBread.csv	BRL_A5CFY6	33825000000	82399000000	39592000000	Tubulin beta chain OS=Hordeum vulgare subsp. vulgare OX=112509 GN=tub3 PE=2 SV=1
PlainYeastBread.csv	WHT_A0A1D6BQY9	33825000000	82399000000	39592000000	Tubulin beta chain OS=Triticum aestivum OX=4565 GN=CFC21_099789 PE=3 SV=1
PlainYeastBread.csv	CS_P00950	3212800000000	40700000000	2368400000000	Phosphoglycerate mutase 1 OS=Saccharomyces cerevisiae (strain ATCC 204508 / S288c) OX=559292 GN=GPM1 PE=1 SV=3
PlainYeastBread.csv	WHT_Q2WGB1	701270000000	1211400000000	563940000000	Starch synthase chloroplastic/amyloplastic OS=Triticum aestivum OX=4565 GN=wSSII-D PE=3 SV=1
PlainYeastBread.csv	WHT_A0A3B6I4M8	122200000000	1632600000000	899980000000	Peroxidase OS=Triticum aestivum OX=4565 GN=CFC21_055003 PE=3 SV=1
PlainYeastBread.csv	BRL_A0A8I6X8S0	29644000000	285480000	9045400000	Cupin type-1 domain-containing protein OS=Hordeum vulgare subsp. vulgare OX=112509 PE=4 SV=1
PlainYeastBread.csv	WHT_A0A3B6PE52	1144000000000	15489000000000	8168400000000	Bifunctional inhibitor/plant lipid transfer protein/seed storage helical domain-containing protein OS=Triticum aestivum OX=4565 GN=CFC21_085772 PE=3 SV=1
PlainYeastBread.csv	WHT_A0A3B6SGS8	300830000000	694580000000	264050000000	Pyrophosphate--fructose 6-phosphate 1-phosphotransferase subunit beta OS=Triticum aestivum OX=4565 GN=PFP-BETA PE=3 SV=1
PlainYeastBread.csv	WHT_A0A3B6TIG9	5333100000000	405500000000	3063200000000	Bifunctional inhibitor/plant lipid transfer protein/seed storage helical domain-containing protein OS=Triticum aestivum OX=4565 GN=CFC21_106668 PE=4 SV=1
PlainYeastBread.csv	WHT_A0A3B5Y650	5394400000000	5901500000000	5066100000000	Uncharacterized protein OS=Triticum aestivum OX=4565 PE=3 SV=1
PlainYeastBread.csv	BRL_F2D4W6	0	11677000000	4070900000	Malate dehydrogenase OS=Hordeum vulgare subsp. vulgare OX=112509 PE=2 SV=1
PlainYeastBread.csv	WHT_A0A3B5YTF2	98248000000	105670000000	36551000000	Cupin type-1 domain-containing protein OS=Triticum aestivum OX=4565 GN=CFC21_005477 PE=3 SV=1
PlainYeastBread.csv	WHT_A0A3B6FHE6		0	896760000	Bifunctional inhibitor/plant lipid transfer protein/seed storage helical domain-containing protein OS=Triticum aestivum OX=4565 GN=CFC21_040031 PE=3 SV=1
PlainYeastBread.csv	BRL_A0A8I6YKH0	4496200000000	521200000000	2818600000000	Bifunctional inhibitor/plant lipid transfer protein/seed storage helical domain-containing protein OS=Hordeum vulgare subsp. vulgare OX=112509 PE=3 SV=1
PlainYeastBread.csv	BRL_A0A8I6WH70		11242000000	197420000000	Cupin type-1 domain-containing protein OS=Hordeum vulgare subsp. vulgare OX=112509 PE=3 SV=1
PlainYeastBread.csv	WHT_A0A3B6R8P8	1289200000000	1645300000000	869570000000	Peroxidase OS=Triticum aestivum OX=4565 GN=CFC21_024119 PE=3 SV=1
PlainYeastBread.csv	WHT_A0A3B6I5M0	1334800000000	1544800000000	1031500000000	Bifunctional inhibitor/plant lipid transfer protein/seed storage helical domain-containing protein OS=Triticum aestivum OX=4565 GN=CFC21_055390 PE=4 SV=1
PlainYeastBread.csv	CS_P00942	825350000000	1525300000000	1041500000000	Triosephosphate isomerase OS=Saccharomyces cerevisiae (strain ATCC 204508 / S288c) OX=559292 GN=TPI1 PE=1 SV=2
PlainYeastBread.csv	WHT_A0A3B6QK96	198260000000	394260000000	215140000000	Aldehyde dehydrogenase domain-containing protein OS=Triticum aestivum OX=4565 GN=CFC21_094390 PE=3 SV=1
PlainYeastBread.csv	BRL_Q4VM11	59945000	52964000000	32376000000	Beta-amylase OS=Hordeum vulgare subsp. vulgare OX=112509 GN=bmy2 PE=2 SV=1
PlainYeastBread.csv	BRL_A0A8I6YIG1		32507000000	0	chitinase OS=Hordeum vulgare subsp. vulgare OX=112509 PE=4 SV=1
PlainYeastBread.csv	WHT_A0A3B6SQ43	127430000000	4485300000	261900000	chitinase OS=Triticum aestivum OX=4565 GN=CFC21_105945 PE=4 SV=1
PlainYeastBread.csv	WHT_Q2A783	2016700000000	2492700000000	1277200000000	Avenin-like b1 OS=Triticum aestivum OX=4565 GN=AVNLB PE=1 SV=1
PlainYeastBread.csv	WHT_A0A3B6D742	91134000000	108910000000	55251000000	Ricin B lectin domain-containing protein OS=Triticum aestivum OX=4565 GN=CFC21_028030 PE=4 SV=1
PlainYeastBread.csv	WHT_A0A3B6EGL9	126260000000	268210000000	10850000000	Aspartic proteinase OS=Triticum aestivum OX=4565 GN=CFC21_035686 PE=3 SV=1
PlainYeastBread.csv	WHT_A0A3B6ISM7	97635000000	95436000000	76653000000	Cupin type-1 domain-containing protein OS=Triticum aestivum OX=4565 PE=4 SV=1
PlainYeastBread.csv	WHT_A0A3B6TLW2	1220300000000	114300000000	1138800000000	Serpin domain-containing protein OS=Triticum aestivum OX=4565 GN=CFC21_108127 PE=3 SV=1
PlainYeastBread.csv	WHT_A0A3B6JKR7	144940000000	153260000000	92952000000	Cupin type-1 domain-containing protein OS=Triticum aestivum OX=4565 GN=CFC21_062683 PE=4 SV=1
PlainYeastBread.csv	WHT_A0A077S3V2	237470000000	349420000000	231380000000	Aspartate aminotransferase OS=Triticum aestivum OX=4565 GN=CFC21_042267 PE=3 SV=1
PlainYeastBread.csv	CS_P19882	320750000000	621260000000	278940000000	Heat shock protein 60 mitochondrial OS=Saccharomyces cerevisiae (strain ATCC 204508 / S288c) OX=559292 GN=HSP60 PE=1 SV=1
PlainYeastBread.csv	CS_P00330	2241700000000	2399500000000	1751200000000	Alcohol dehydrogenase 1 OS=Saccharomyces cerevisiae (strain ATCC 204508 / S288c) OX=559292 GN=ADH1 PE=1 SV=5
PlainYeastBread.csv	WHT_A0A3B6EN11	850010000000	1414500000000	84550000000	Methanethiol oxidase OS=Triticum aestivum OX=4565 GN=CFC21_037544 PE=3 SV=1
PlainYeastBread.csv	WHT_A0A1D5ZL98	31358000000	85281000000	5971700000	rRNA N-glycosylase OS=Triticum aestivum OX=4565 GN=CFC21_080469 PE=3 SV=1
PlainYeastBread.csv	WHT_D2KFH1	576200000000	6406700000000	387400000000	Avenin-like a4 OS=Triticum aestivum OX=4565 PE=2 SV=1
PlainYeastBread.csv	BRL_F2CTV7	385870000000	1040500000000	525190000000	Predicted protein OS=Hordeum vulgare subsp. vulgare OX=112509 PE=2 SV=1
PlainYeastBread.csv	WHT_A0A3B6AW32	0	2288100000		Beta-amylase OS=Triticum aestivum OX=4565 GN=CFC21_016482 PE=3 SV=1
PlainYeastBread.csv	BRL_A0A8I6Y1B6	101340000000	180210000000	83669000000	Aspartate aminotransferase OS=Hordeum vulgare subsp. vulgare OX=112509 PE=3 SV=1
PlainYeastBread.csv	CS_P17505	253550000000	381520000000	240770000000	Malate dehydrogenase mitochondrial OS=Saccharomyces cerevisiae (strain ATCC 204508 / S288c) OX=559292 GN=MDH1 PE=1 SV=2
PlainYeastBread.csv	WHT_A0A3B5ZYX1	213940000000	313460000000	146730000000	NADP-dependent oxidoreductase domain-containing protein OS=Triticum aestivum OX=4565 GN=CFC21_012660 PE=3 SV=1
PlainYeastBread.csv	CS_P05694	530450000000	674430000000	447570000000	5-methyltetrahydropteroyltriglutamate--homocysteine methyltransferase OS=Saccharomyces cerevisiae (strain ATCC 204508 / S288c) OX=559292 GN=MET6 PE=1 SV=4
PlainYeastBread.csv	WHT_A0A3B5Y5K9	41016000000	2048000000	3089500000	ATP synthase subunit beta OS=Triticum aestivum OX=4565 PE=3 SV=1
PlainYeastBread.csv	WHT_A0A3B6MXI6	464590000000	360130000000	251560000000	SMP domain-containing protein OS=Triticum aestivum OX=4565 GN=CFC21_079484 PE=3 SV=1
PlainYeastBread.csv	BRL_M0WF40	53361000000	111010000000	57005000000	Elongation factor 1-gamma 2 OS=Hordeum vulgare subsp. vulgare OX=112509 PE=4 SV=1
PlainYeastBread.csv	WHT_F4Y595	43699000000	159430000000	43024000000	Heat shock protein 90 OS=Triticum aestivum OX=4565 GN=Hsp90.3-A1 PE=2 SV=1
PlainYeastBread.csv	BRL_A0A8I6YT49	43699000000	160240000000	43024000000	Histidine kinase/HSP90-like ATPase domain-containing protein OS=Hordeum vulgare subsp. vulgare OX=112509 PE=3 SV=1
PlainYeastBread.csv	CS_P00830	831190000000	1045500000000	573580000000	ATP synthase subunit beta mitochondrial OS=Saccharomyces cerevisiae (strain ATCC 204508 / S288c) OX=559292 GN=ATP2 PE=1 SV=2
PlainYeastBread.csv	WHT_A0A3B6NKH5	664360000	0		ATP-dependent RNA helicase OS=Triticum aestivum OX=4565 PE=3 SV=1
PlainYeastBread.csv	CS_P06168	908730000000	518350000000	647840000000	Ketol-acid reductoisomerase mitochondrial OS=Saccharomyces cerevisiae (strain ATCC 204508 / S288c) OX=559292 GN=ILV5 PE=1 SV=1
PlainYeastBread.csv	WHT_A7UME1	139230000000	174370000000	86651000000	Xylanase inhibitor 725ACC OS=Triticum aestivum OX=4565 GN=CFC21_049897 PE=3 SV=1
PlainYeastBread.csv	CS_P02829	323050000000	472250000000	256150000000	ATP-dependent molecular chaperone HSP82 OS=Saccharomyces cerevisiae (strain ATCC 204508 / S288c) OX=559292 GN=HSP82 PE=1 SV=1
PlainYeastBread.csv	WHT_A0A3B6ITU0	1784700000000	1977300000000	1231200000000	Bifunctional inhibitor/plant lipid transfer protein/seed storage helical domain-containing protein OS=Triticum aestivum OX=4565 GN=CFC21_058462 PE=4 SV=1
PlainYeastBread.csv	WHT_A0A3B6D834	5171000000	166280000000	33115000000	Histidine kinase/HSP90-like ATPase domain-containing protein OS=Triticum aestivum OX=4565 PE=3 SV=1
PlainYeastBread.csv	BRL_A0A8I6WUT1	158540000000	190030000000	105640000000	Desiccation-related protein PCC13-62 OS=Hordeum vulgare subsp. vulgare OX=112509 PE=4 SV=1
PlainYeastBread.csv	WHT_A0A3B5ZXX7	828310000000	1000400000000	610310000000	Large ribosomal subunit protein uL4 C-terminal domain-containing protein OS=Triticum aestivum OX=4565 GN=CFC21_012388 PE=3 SV=1
PlainYeastBread.csv	WHT_A0A3B6JN50	1142500000000	1749300000000	1074100000000	Bifunctional inhibitor/plant lipid transfer protein/seed storage helical domain-containing protein OS=Triticum aestivum OX=4565 GN=CFC21_062560 PE=4 SV=1
PlainYeastBread.csv	WHT_Q9ST57	257890000000	259120000000	294270000000	Serpin-Z2A OS=Triticum aestivum OX=4565 PE=1 SV=1
PlainYeastBread.csv	WHT_Q10464	8522400000000	13581000000000	7330200000000	Puroindoline-B OS=Triticum aestivum OX=4565 GN=PINB PE=1 SV=1
PlainYeastBread.csv	WHT_Q05806	2864600000000	3087100000000	2190300000000	Type-5 thionin OS=Triticum aestivum OX=4565 GN=TTHV PE=2 SV=1
PlainYeastBread.csv	WHT_A0A3B6AS74	0	0	8585300000	PH domain-containing protein OS=Triticum aestivum OX=4565 GN=CFC21_015361 PE=4 SV=1
PlainYeastBread.csv	WHT_A0A3B6JLF7	46845000000	47115000000	28472000000	Uncharacterized protein OS=Triticum aestivum OX=4565 PE=4 SV=1
PlainYeastBread.csv	WHT_A0A1D6S518	489240000000	656020000000	374240000000	UTP--glucose-1-phosphate uridylyltransferase OS=Triticum aestivum OX=4565 GN=CFC21_046993 PE=3 SV=1
PlainYeastBread.csv	BRL_A0A8I7BAI2	19154000000	2174000000	0	Tubulin beta chain OS=Hordeum vulgare subsp. vulgare OX=112509 PE=3 SV=1
PlainYeastBread.csv	WHT_A0A3B6GX40	19154000000	2174000000	0	Tubulin beta chain OS=Triticum aestivum OX=4565 GN=CFC21_048447 PE=3 SV=1
PlainYeastBread.csv	WHT_P06659	2244200000000	3562400000000	2186500000000	Gamma-gliadin B OS=Triticum aestivum OX=4565 PE=3 SV=1
PlainYeastBread.csv	WHT_A0A3B6GYF7	0	6461600000		ATP synthase subunit beta OS=Triticum aestivum OX=4565 GN=CFC21_047786 PE=3 SV=1
PlainYeastBread.csv	WHT_Q9T0P1	948080000000	944250000000	1508100000000	Alpha purothionin OS=Triticum aestivum OX=4565 GN=Pur-B1 PE=3 SV=1
PlainYeastBread.csv	WHT_P32032	678820000000	1003900000000	1306900000000	Alpha-2-purothionin OS=Triticum aestivum OX=4565 GN=THI1.2 PE=2 SV=1
PlainYeastBread.csv	WHT_W5IA32	27710000000	311120000000	210780000000	Formate dehydrogenase mitochondrial OS=Triticum aestivum OX=4565 GN=CFC21_102315 PE=3 SV=1
PlainYeastBread.csv	WHT_A0A3B5XT99	4608200000000	7623200000000	398700000000	Bifunctional inhibitor/plant lipid transfer protein/seed storage helical domain-containing protein OS=Triticum aestivum OX=4565 PE=4 SV=1
PlainYeastBread.csv	CS_P17709	289160000000	500320000000	294970000000	Glucokinase-1 OS=Saccharomyces cerevisiae (strain ATCC 204508 / S288c) OX=559292 GN=GLK1 PE=1 SV=1
PlainYeastBread.csv	WHT_P04729	757030000000	1149900000000	322440000000	Gamma-gliadin B-I OS=Triticum aestivum OX=4565 PE=2 SV=1
PlainYeastBread.csv	BRL_A0A8I6YLW7	0			Heat shock cognate 70 kDa protein OS=Hordeum vulgare subsp. vulgare OX=112509 PE=3 SV=1
PlainYeastBread.csv	BRL_A0A8I7BFU9	399900000	0	0	1 4-alpha-glucan branching enzyme OS=Hordeum vulgare subsp. vulgare OX=112509 PE=3 SV=1
PlainYeastBread.csv	WHT_D2KFG9	13433000000	36109000000	14111000000	Gliadin/avenin-like seed protein OS=Triticum aestivum OX=4565 GN=CFC21_009626 PE=2 SV=1
PlainYeastBread.csv	WHT_A0A3B6C9V8	2995500000000	4305400000000	2111500000000	Alpha-amylase/subtilisin inhibitor OS=Triticum aestivum OX=4565 GN=CFC21_024538 PE=4 SV=1
PlainYeastBread.csv	WHT_D0PRB4	177590000000	266260000000	130290000000	Peroxiredoxin OS=Triticum aestivum OX=4565 GN=CAMPLR22A2D_LOCUS5300 PE=2 SV=1
PlainYeastBread.csv	CS_P38720	146720000000	231590000000	221510000000	6-phosphogluconate dehydrogenase decarboxylating 1 OS=Saccharomyces cerevisiae (strain ATCC 204508 / S288c) OX=559292 GN=GND1 PE=1 SV=1
PlainYeastBread.csv	WHT_A0A3B6KDW0	17883000000	36944000000	18324000000	Actin OS=Triticum aestivum OX=4565 GN=CFC21_065019 PE=3 SV=1
PlainYeastBread.csv	WHT_A0A3B6HPE1	130160000000	164230000000	89369000000	Uncharacterized protein OS=Triticum aestivum OX=4565 GN=CFC21_050980 PE=4 SV=1
PlainYeastBread.csv	WHT_P02861	15191000000000	4012100000000	291400000000	Glutenin high molecular weight subunit PC256 (Fragment) OS=Triticum aestivum OX=4565 PE=2 SV=1
PlainYeastBread.csv	CS_P07257	209830000000	313920000000	133220000000	Cytochrome b-c1 complex subunit 2 mitochondrial OS=Saccharomyces cerevisiae (strain ATCC 204508 / S288c) OX=559292 GN=QCR2 PE=1 SV=1
PlainYeastBread.csv	CS_P31539	225260000000	465330000000	278920000000	Heat shock protein 104 OS=Saccharomyces cerevisiae (strain ATCC 204508 / S288c) OX=559292 GN=HSP104 PE=1 SV=2
PlainYeastBread.csv	CS_P07251	910290000000	113200000000	640050000000	ATP synthase subunit alpha mitochondrial OS=Saccharomyces cerevisiae (strain ATCC 204508 / S288c) OX=559292 GN=ATP1 PE=1 SV=5
PlainYeastBread.csv	WHT_A0A3B6IQY2	127430000000	180370000000	85499000000	Cupin type-1 domain-containing protein OS=Triticum aestivum OX=4565 GN=CFC21_057671 PE=4 SV=1
PlainYeastBread.csv	WHT_A0A3B6EEA7	302730000000	477650000000	285420000000	Triose-phosphate isomerase OS=Triticum aestivum OX=4565 PE=3 SV=1
PlainYeastBread.csv	CS_P38009	121980000000	18950000000	80571000000	Bifunctional purine biosynthesis protein ADE17 OS=Saccharomyces cerevisiae (strain ATCC 204508 / S288c) OX=559292 GN=ADE17 PE=1 SV=2
PlainYeastBread.csv	BRL_A0A8I6WHE5	54771000000	8734000000	49606000000	Peroxiredoxin OS=Hordeum vulgare subsp. vulgare OX=112509 PE=3 SV=1
PlainYeastBread.csv	CS_P04840	608870000000	1076300000000	667780000000	Mitochondrial outer membrane protein porin 1 OS=Saccharomyces cerevisiae (strain ATCC 204508 / S288c) OX=559292 GN=POR1 PE=1 SV=4
PlainYeastBread.csv	SOY_A0A0R4J4C3	328420000000	360530000000	703750000000	Elongation factor 1-alpha OS=Glycine max OX=3847 GN=100776330 PE=3 SV=1
PlainYeastBread.csv	BRL_F2CS69	0			Pyrophosphate--fructose 6-phosphate 1-phosphotransferase subunit beta OS=Hordeum vulgare subsp. vulgare OX=112509 GN=PFP-BETA PE=2 SV=1
PlainYeastBread.csv	WHT_A0A3B6HSA4	33388000000	33608000000	13839000000	Cupin type-1 domain-containing protein OS=Triticum aestivum OX=4565 GN=CFC21_051222 PE=4 SV=1
PlainYeastBread.csv	WHT_A0A3B6SNK2	58712000000	68507000000	36962000000	Thaumatin-like protein OS=Triticum aestivum OX=4565 GN=CFC21_105385 PE=4 SV=1
PlainYeastBread.csv	WHT_A0A3B5Z3R9	6516900000	59812000000	42858000000	Uncharacterized protein OS=Triticum aestivum OX=4565 GN=CFC21_008540 PE=3 SV=1
PlainYeastBread.csv	WHT_A0A3B6AR02	26856000000	21115000000	30649000000	L-ascorbate peroxidase OS=Triticum aestivum OX=4565 GN=CFC21_015182 PE=3 SV=1
PlainYeastBread.csv	WHT_A0A3B5YTY7	225920000000	465690000000	206150000000	Uncharacterized protein OS=Triticum aestivum OX=4565 GN=CFC21_005658 PE=4 SV=1
PlainYeastBread.csv	BRL_A0A8I6WGH5		7342600000	0	L-ascorbate peroxidase OS=Hordeum vulgare subsp. vulgare OX=112509 PE=3 SV=1
PlainYeastBread.csv	WHT_Q8L5C6	706060000000	687070000000	415110000000	Xylanase inhibitor protein 1 OS=Triticum aestivum OX=4565 GN=XIPI PE=1 SV=2
PlainYeastBread.csv	BRL_A0A8I6XZV6	9920900000	30457000000	25382000000	Clathrin heavy chain OS=Hordeum vulgare subsp. vulgare OX=112509 PE=3 SV=1
PlainYeastBread.csv	CS_P06115	180780000000	359190000000	197090000000	Catalase T OS=Saccharomyces cerevisiae (strain ATCC 204508 / S288c) OX=559292 GN=CTT1 PE=1 SV=3
PlainYeastBread.csv	WHT_A0A3B6C715	145550000000	283960000000	127610000000	1 4-alpha-glucan branching enzyme OS=Triticum aestivum OX=4565 GN=CFC21_023692 PE=3 SV=1
PlainYeastBread.csv	CS_P09435	4574900000	20562000000	7051400000	Heat shock protein SSA3 OS=Saccharomyces cerevisiae (strain ATCC 204508 / S288c) OX=559292 GN=SSA3 PE=1 SV=3
PlainYeastBread.csv	BRL_A0A8I6YNC6	121750000000			Elongation factor 1-alpha OS=Hordeum vulgare subsp. vulgare OX=112509 PE=3 SV=1
PlainYeastBread.csv	WHT_A0A3B6MN25	315370000	18388000000	352360000	Uncharacterized protein OS=Triticum aestivum OX=4565 GN=CFC21_076611 PE=3 SV=1
PlainYeastBread.csv	WHT_O64393	1287300000000	201400000000	1174200000000	Wheatwin-2 OS=Triticum aestivum OX=4565 GN=PR4B PE=1 SV=1
PlainYeastBread.csv	CS_P00890	533890000000	926730000000	527450000000	Citrate synthase mitochondrial OS=Saccharomyces cerevisiae (strain ATCC 204508 / S288c) OX=559292 GN=CIT1 PE=1 SV=2
PlainYeastBread.csv	WHT_A0A3B6HVT4	24019000000	30429000000	3556700000	Cupin type-1 domain-containing protein OS=Triticum aestivum OX=4565 GN=CFC21_052148 PE=4 SV=1
PlainYeastBread.csv	WHT_M9TGF7	5025800000000	8322900000000	4080200000000	Gamma gliadin-D2 OS=Triticum aestivum OX=4565 GN=Gli-1 PE=2 SV=1
PlainYeastBread.csv	WHT_A0A3B6QJE0	519540000000	648860000000	362270000000	Bifunctional inhibitor/plant lipid transfer protein/seed storage helical domain-containing protein OS=Triticum aestivum OX=4565 GN=CFC21_093225 PE=3 SV=1
PlainYeastBread.csv	WHT_A0A3B6LFH5	11790000000	202650000000	75968000000	Pyrophosphate--fructose 6-phosphate 1-phosphotransferase subunit alpha OS=Triticum aestivum OX=4565 GN=PFP-ALPHA PE=3 SV=1
PlainYeastBread.csv	WHT_Q2A784	5373400000000	6628400000000	4033300000000	Avenin-like a1 OS=Triticum aestivum OX=4565 GN=AVNLA PE=2 SV=1
PlainYeastBread.csv	WHT_Q8H0K8	88903000000	113680000000	103230000000	Xylanase inhibitor OS=Triticum aestivum OX=4565 GN=xiI PE=1 SV=1
PlainYeastBread.csv	CS_P16862	32435000000	10010000000	21869000000	ATP-dependent 6-phosphofructokinase subunit beta OS=Saccharomyces cerevisiae (strain ATCC 204508 / S288c) OX=559292 GN=PFK2 PE=1 SV=4
PlainYeastBread.csv	WHT_A0A3B6PM63	779450000000	20239000000	12231000000	Adenosine kinase OS=Triticum aestivum OX=4565 GN=CFC21_088464 PE=3 SV=1
PlainYeastBread.csv	BRL_A0A8I6XCG6	23454000000	44323000000	12801000000	proline--tRNA ligase OS=Hordeum vulgare subsp. vulgare OX=112509 PE=3 SV=1
PlainYeastBread.csv	CS_P0CS90	284030000000	403980000000	189240000000	Import motor subunit mitochondrial OS=Saccharomyces cerevisiae (strain ATCC 204508 / S288c) OX=559292 GN=SSC1 PE=1 SV=1
PlainYeastBread.csv	WHT_A0A3B6ECF3	2350800000000	4329900000000	2213400000000	Bifunctional inhibitor/plant lipid transfer protein/seed storage helical domain-containing protein OS=Triticum aestivum OX=4565 GN=CFC21_034200 PE=3 SV=1
PlainYeastBread.csv	WHT_A0A3B6JL06	462730000000	99010000000	468270000000	Gamma-interferon-inducible lysosomal thiol reductase OS=Triticum aestivum OX=4565 GN=CFC21_061948 PE=3 SV=1
PlainYeastBread.csv	WHT_A0A3B6C6W9	29763000000	684800000	0	Desiccation-related protein PCC13-62 OS=Triticum aestivum OX=4565 GN=CFC21_023673 PE=4 SV=1
PlainYeastBread.csv	WHT_A0A3B6JJQ0	14359000000	9875200000	12431000000	UDP-arabinopyranose mutase OS=Triticum aestivum OX=4565 GN=CFC21_061524 PE=3 SV=1
PlainYeastBread.csv	WHT_A0A3B6IR97	6832800000	3812900000	12743000000	Clathrin heavy chain OS=Triticum aestivum OX=4565 GN=CFC21_057296 PE=3 SV=1
PlainYeastBread.csv	CS_P18239	251370000000	457180000000	284430000000	ADP ATP carrier protein 2 OS=Saccharomyces cerevisiae (strain ATCC 204508 / S288c) OX=559292 GN=PET9 PE=1 SV=2
PlainYeastBread.csv	WHT_A0A3B6HW60	188710000000	230530000000	151820000000	phosphoglucomutase (alpha-D-glucose-1 6-bisphosphate-dependent) OS=Triticum aestivum OX=4565 PE=3 SV=1
PlainYeastBread.csv	CS_P37291	113860000000	291970000000	190850000000	Serine hydroxymethyltransferase cytosolic OS=Saccharomyces cerevisiae (strain ATCC 204508 / S288c) OX=559292 GN=SHM2 PE=1 SV=2
PlainYeastBread.csv	WHT_Q9SPH4	3824900000	105000000	4771800000	Heat shock protein 101 OS=Triticum aestivum OX=4565 GN=HSP101c PE=2 SV=1
PlainYeastBread.csv	BRL_F2CSK4	9057700000	40388000000	4037500000	Predicted protein OS=Hordeum vulgare subsp. vulgare OX=112509 PE=2 SV=1
PlainYeastBread.csv	WHT_A0A3B6RB11	1715300000000	1467100000000	1028800000000	Bifunctional inhibitor/plant lipid transfer protein/seed storage helical domain-containing protein OS=Triticum aestivum OX=4565 GN=CFC21_095313 PE=4 SV=1
PlainYeastBread.csv	BRL_F2CR56	96827000000	172090000000	8089000000	phosphoenolpyruvate carboxylase OS=Hordeum vulgare subsp. vulgare OX=112509 PE=2 SV=1
PlainYeastBread.csv	WHT_A0A3B6EIH6	86991000000	154830000000	84807000000	EF-hand domain-containing protein OS=Triticum aestivum OX=4565 GN=CFC21_035097 PE=4 SV=1
PlainYeastBread.csv	WHT_A0A3B6GRI6	86991000000	154830000000	84807000000	EF-hand domain-containing protein OS=Triticum aestivum OX=4565 GN=CFC21_047004 PE=4 SV=1
PlainYeastBread.csv	CS_P16547	25220000000	274610000000	141840000000	Mitochondrial outer membrane protein OM45 OS=Saccharomyces cerevisiae (strain ATCC 204508 / S288c) OX=559292 GN=OM45 PE=1 SV=2
PlainYeastBread.csv	WHT_A0A3B5YUN2	423790000000	450890000000	337340000000	Uncharacterized protein OS=Triticum aestivum OX=4565 GN=CFC21_006200 PE=3 SV=1
PlainYeastBread.csv	BRL_A0A8I6X1I0	423790000000	450890000000	337340000000	Uncharacterized protein OS=Hordeum vulgare subsp. vulgare OX=112509 PE=3 SV=1
PlainYeastBread.csv	BRL_M0X0A5	171540000000	290430000000	135760000000	Actin OS=Hordeum vulgare subsp. vulgare OX=112509 PE=3 SV=1
PlainYeastBread.csv	WHT_W5AFW9	171540000000	290430000000	135760000000	Actin OS=Triticum aestivum OX=4565 GN=CFC21_029545 PE=3 SV=1
PlainYeastBread.csv	WHT_A0A3B6A1F1	0	0	6260800000	Acetohydroxy-acid reductoisomerase OS=Triticum aestivum OX=4565 GN=CFC21_013929 PE=3 SV=1
PlainYeastBread.csv	CS_P19097	41036000000	109460000000	51922000000	Fatty acid synthase subunit alpha OS=Saccharomyces cerevisiae (strain ATCC 204508 / S288c) OX=559292 GN=FAS2 PE=1 SV=2
PlainYeastBread.csv	WHT_A0A3B6TIX0	14313000000000	1699000000000	10233000000000	Bifunctional inhibitor/plant lipid transfer protein/seed storage helical domain-containing protein OS=Triticum aestivum OX=4565 GN=CFC21_107213 PE=3 SV=1
PlainYeastBread.csv	BRL_A0A8I6WH69	67495000000	134240000000	62983000000	4-hydroxy-7-methoxy-3-oxo-3 4-dihydro-2H-1 4-benzoxazin-2-yl glucosidebeta-D-glucosidase OS=Hordeum vulgare subsp. vulgare OX=112509 PE=3 SV=1
PlainYeastBread.csv	CS_P07262	92484000000	138190000000	85782000000	NADP-specific glutamate dehydrogenase 1 OS=Saccharomyces cerevisiae (strain ATCC 204508 / S288c) OX=559292 GN=GDH1 PE=1 SV=2
PlainYeastBread.csv	BRL_A0A8I6WKF6	2710900000000	11631000000000	6545900000000	D hordein OS=Hordeum vulgare subsp. vulgare OX=112509 PE=3 SV=1
PlainYeastBread.csv	WHT_P82900	2727500000000	243800000000	1596700000000	Non-specific lipid-transfer protein 2G OS=Triticum aestivum OX=4565 PE=1 SV=2
PlainYeastBread.csv	BRL_A0A8I6WYL2	116560000000	185010000000	123050000000	14-3-3 domain-containing protein OS=Hordeum vulgare subsp. vulgare OX=112509 PE=3 SV=1
PlainYeastBread.csv	WHT_A0A1B5GE57	511440000000	671290000000	324040000000	Caleosin OS=Triticum aestivum OX=4565 GN=Clo2 PE=2 SV=1
PlainYeastBread.csv	WHT_Q93W25	2638600000000	3743300000000	1704200000000	Peptidyl-prolyl cis-trans isomerase OS=Triticum aestivum OX=4565 GN=CyP3 PE=1 SV=1
PlainYeastBread.csv	WHT_A0A3B6EHK7	330320000000	41040000000	265470000000	Uncharacterized protein OS=Triticum aestivum OX=4565 PE=3 SV=1
PlainYeastBread.csv	CS_P04147	49159000000	81139000000	48331000000	Polyadenylate-binding protein cytoplasmic and nuclear OS=Saccharomyces cerevisiae (strain ATCC 204508 / S288c) OX=559292 GN=PAB1 PE=1 SV=4
PlainYeastBread.csv	WHT_A0A3B6ASR5	27580000000	502670000000	277680000000	4-hydroxy-7-methoxy-3-oxo-3 4-dihydro-2H-1 4-benzoxazin-2-yl glucosidebeta-D-glucosidase OS=Triticum aestivum OX=4565 GN=CFC21_015688 PE=3 SV=1
PlainYeastBread.csv	WHT_A0A1D5SLI4	404340000000	590310000000	327960000000	40S ribosomal protein S4 OS=Triticum aestivum OX=4565 GN=CFC21_005863 PE=3 SV=1
PlainYeastBread.csv	WHT_A0A3B5Y7Z1	45358000000	100140000000	25271000000	Malate dehydrogenase OS=Triticum aestivum OX=4565 PE=3 SV=1
PlainYeastBread.csv	CS_P06208	160860000000	188330000000	124090000000	2-isopropylmalate synthase OS=Saccharomyces cerevisiae (strain ATCC 204508 / S288c) OX=559292 GN=LEU4 PE=1 SV=1
PlainYeastBread.csv	CRAP_K1C10	171680000000	125180000000	319030000000	CRAP_K1C10_HUMAN
PlainYeastBread.csv	WHT_W5A874	62711000000	66903000000	38000000	Dihydrolipoyl dehydrogenase OS=Triticum aestivum OX=4565 GN=CFC21_005992 PE=3 SV=1
PlainYeastBread.csv	CS_P16467	768080000000	884830000000	674680000000	Pyruvate decarboxylase isozyme 2 OS=Saccharomyces cerevisiae (strain ATCC 204508 / S288c) OX=559292 GN=PDC5 PE=1 SV=4
PlainYeastBread.csv	WHT_A0A077RY90	333690000000	874680000000	350470000000	Uncharacterized protein OS=Triticum aestivum OX=4565 GN=CFC21_043277 PE=4 SV=1
PlainYeastBread.csv	CS_P34730	6281500000	17749000000	3057000000	Protein BMH2 OS=Saccharomyces cerevisiae (strain ATCC 204508 / S288c) OX=559292 GN=BMH2 PE=1 SV=3
PlainYeastBread.csv	CS_P23254	136170000000	214350000000	114510000000	Transketolase 1 OS=Saccharomyces cerevisiae (strain ATCC 204508 / S288c) OX=559292 GN=TKL1 PE=1 SV=4
PlainYeastBread.csv	WHT_A0A3B5YSH7	133770000000	324860000000	247550000000	Cupin type-1 domain-containing protein OS=Triticum aestivum OX=4565 GN=CFC21_005210 PE=3 SV=1
PlainYeastBread.csv	CS_P19358	55169000000	123740000000	76826000000	S-adenosylmethionine synthase 2 OS=Saccharomyces cerevisiae (strain ATCC 204508 / S288c) OX=559292 GN=SAM2 PE=1 SV=3
PlainYeastBread.csv	WHT_A0A3B6JHB6	30578000000	34596000000	16829000000	Cupin type-1 domain-containing protein OS=Triticum aestivum OX=4565 GN=CFC21_061729 PE=4 SV=1
PlainYeastBread.csv	WHT_A0A3B6EM13	103050000000	193870000000	83222000000	Triose-phosphate isomerase OS=Triticum aestivum OX=4565 GN=CFC21_036887 PE=3 SV=1
PlainYeastBread.csv	WHT_P0CZ11	2858400000000	6488300000000	356200000000	Avenin-like a7 OS=Triticum aestivum OX=4565 PE=3 SV=1
PlainYeastBread.csv	CS_P10081	303870000000	40160000000	219980000000	ATP-dependent RNA helicase eIF4A OS=Saccharomyces cerevisiae (strain ATCC 204508 / S288c) OX=559292 GN=TIF2 PE=1 SV=3
PlainYeastBread.csv	CRAP_CAS1	5152300000000	6215400000000	4813700000000	CRAP_CAS1_BOVIN
PlainYeastBread.csv	WHT_A0A3B6ETT6	151510000000	235610000000	79143000000	Pectin acetylesterase OS=Triticum aestivum OX=4565 GN=CFC21_038660 PE=3 SV=1
PlainYeastBread.csv	WHT_Q8GZB0	1909500000000	2228400000000	1686800000000	Non-specific lipid-transfer protein OS=Triticum aestivum OX=4565 GN=LTP1500 PE=3 SV=1
PlainYeastBread.csv	WHT_A0A3B6LFD2	50170000000	543430000000	325450000000	Thaumatin-like protein OS=Triticum aestivum OX=4565 GN=CFC21_069595 PE=4 SV=1
PlainYeastBread.csv	BRL_F2CRF1	277020000000	389510000000	343130000000	Predicted protein OS=Hordeum vulgare subsp. vulgare OX=112509 PE=2 SV=1
PlainYeastBread.csv	WHT_L0GED8	277020000000	389510000000	343130000000	14-3-3 protein OS=Triticum aestivum OX=4565 GN=14R2 PE=2 SV=1
PlainYeastBread.csv	WHT_A0A1D5UKZ4	434780000000	556640000000	321320000000	40S ribosomal protein S8 OS=Triticum aestivum OX=4565 GN=CAMPLR22A2D_LOCUS2741 PE=3 SV=1
PlainYeastBread.csv	WHT_A0A3B6TYS2	84379000000	244150000000	111690000000	Histidine kinase/HSP90-like ATPase domain-containing protein OS=Triticum aestivum OX=4565 GN=CFC21_111680 PE=3 SV=1
PlainYeastBread.csv	BRL_F2D9M2	84379000000	244150000000	111690000000	Predicted protein OS=Hordeum vulgare subsp. vulgare OX=112509 PE=2 SV=1
PlainYeastBread.csv	WHT_W5FEZ3	14505000000	34473000000	622860000	40S ribosomal protein S12 OS=Triticum aestivum OX=4565 GN=CFC21_073837 PE=3 SV=1
PlainYeastBread.csv	CS_P06106	515190000000	83430000000	365010000000	Homocysteine/cysteine synthase OS=Saccharomyces cerevisiae (strain ATCC 204508 / S288c) OX=559292 GN=MET17 PE=1 SV=3
PlainYeastBread.csv	BRL_A0A8I6YC52	0	0	10735000000	Glucose-1-phosphate adenylyltransferase OS=Hordeum vulgare subsp. vulgare OX=112509 PE=3 SV=1
PlainYeastBread.csv	WHT_A0A3B6MQX3	0	0	10735000000	Glucose-1-phosphate adenylyltransferase OS=Triticum aestivum OX=4565 GN=CFC21_077266 PE=3 SV=1
PlainYeastBread.csv	WHT_Q2PCC7	335670000000	184740000000	155160000000	Type 2 non specific lipid transfer protein OS=Triticum aestivum OX=4565 GN=ltp7.1c PE=3 SV=1
PlainYeastBread.csv	WHT_A0A3B6HSI5	641590000000	1050900000000	495730000000	Gamma-interferon-inducible lysosomal thiol reductase OS=Triticum aestivum OX=4565 GN=CFC21_051922 PE=3 SV=1
PlainYeastBread.csv	CS_P10664	421180000000	507890000000	286030000000	Large ribosomal subunit protein uL4A OS=Saccharomyces cerevisiae (strain ATCC 204508 / S288c) OX=559292 GN=RPL4A PE=1 SV=4
PlainYeastBread.csv	SOY_I1KC70	2517700000000	7621200000	0	Glyceraldehyde-3-phosphate dehydrogenase OS=Glycine max OX=3847 GN=100783902 PE=3 SV=1
PlainYeastBread.csv	WHT_A0A3B5YS57	334040000000	412760000000	204260000000	Histone H2A OS=Triticum aestivum OX=4565 GN=CFC21_005110 PE=3 SV=1
PlainYeastBread.csv	WHT_Q5TMB2	27618000000	52918000000	25588000000	Xylanase inhibitor TAXI-IV OS=Triticum aestivum OX=4565 GN=Taxi-IV PE=2 SV=1
PlainYeastBread.csv	CS_P12709	288710000000	327430000000	24570000000	Glucose-6-phosphate isomerase OS=Saccharomyces cerevisiae (strain ATCC 204508 / S288c) OX=559292 GN=PGI1 PE=1 SV=3
PlainYeastBread.csv	WHT_A0A3B6NLQ9	1445900000	0	3632200000	Calnexin OS=Triticum aestivum OX=4565 GN=CFC21_082417 PE=3 SV=1
PlainYeastBread.csv	WHT_A0A3B6ER07	16384000000	31384000000	15171000000	Peptidase A1 domain-containing protein OS=Triticum aestivum OX=4565 GN=CFC21_038018 PE=3 SV=1
PlainYeastBread.csv	WHT_A0A077S7C3	3449500000	18426000000	653290000	Peroxidase OS=Triticum aestivum OX=4565 GN=CFC21_044743 PE=3 SV=1
PlainYeastBread.csv	WHT_A0A1D5UB33	1090100000000	1315600000000	1017500000000	Bifunctional inhibitor/plant lipid transfer protein/seed storage helical domain-containing protein OS=Triticum aestivum OX=4565 GN=CFC21_020496 PE=3 SV=1
PlainYeastBread.csv	WHT_A0A3B6CDW4	51402000000	122170000000	52796000000	Uncharacterized protein OS=Triticum aestivum OX=4565 GN=CFC21_025009 PE=4 SV=1
PlainYeastBread.csv	WHT_A0A3B6PI06	22466000000	33647000000	13968000000	Calnexin OS=Triticum aestivum OX=4565 GN=CFC21_087171 PE=3 SV=1
PlainYeastBread.csv	BRL_F2CQ27	78059000000	141320000000	52186000000	GTP-binding nuclear protein OS=Hordeum vulgare subsp. vulgare OX=112509 PE=2 SV=1
PlainYeastBread.csv	WHT_Q944C6	78059000000	141320000000	52186000000	GTP-binding nuclear protein OS=Triticum aestivum OX=4565 GN=Ran1-2 PE=2 SV=1
PlainYeastBread.csv	CS_P29311	39189000000	42613000000	42397000000	Protein BMH1 OS=Saccharomyces cerevisiae (strain ATCC 204508 / S288c) OX=559292 GN=BMH1 PE=1 SV=4
PlainYeastBread.csv	WHT_A0A3B6CBS4	0	34537000000	5468100000	Polyadenylate-binding protein OS=Triticum aestivum OX=4565 GN=CFC21_024390 PE=3 SV=1
PlainYeastBread.csv	WHT_W5B7W5	368080000000	484660000000	249790000000	Caleosin OS=Triticum aestivum OX=4565 GN=Clo2 PE=2 SV=1
PlainYeastBread.csv	WHT_A0A3B6LJD4	160790000000	364340000000	278210000000	DUF3700 domain-containing protein OS=Triticum aestivum OX=4565 PE=4 SV=1
PlainYeastBread.csv	CS_P16521	200140000000	398620000000	24050000000	Elongation factor 3A OS=Saccharomyces cerevisiae (strain ATCC 204508 / S288c) OX=559292 GN=YEF3 PE=1 SV=4
PlainYeastBread.csv	CS_P0CX38	324820000000	523520000000	300280000000	Small ribosomal subunit protein eS6B OS=Saccharomyces cerevisiae (strain ATCC 204508 / S288c) OX=559292 GN=RPS6B PE=1 SV=1
PlainYeastBread.csv	WHT_A0A3B6ESH8	3875500000	12518000000	36177000000	Peroxidase OS=Triticum aestivum OX=4565 GN=CFC21_038415 PE=3 SV=1
PlainYeastBread.csv	WHT_W5ADS2	30435000000	3481000000	43914000000	Ubiquitin-like domain-containing protein OS=Triticum aestivum OX=4565 GN=CFC21_008998 PE=3 SV=1
PlainYeastBread.csv	BRL_F2D1A7	30435000000	3481000000	43914000000	Predicted protein OS=Hordeum vulgare subsp. vulgare OX=112509 PE=2 SV=1
PlainYeastBread.csv	WHT_A0A3B6CIR4	3455200000	598780000	2951800000	Pyruvate kinase OS=Triticum aestivum OX=4565 GN=CFC21_087564 PE=3 SV=1
PlainYeastBread.csv	CS_P32861	73854000000	158020000000	109750000000	UTP--glucose-1-phosphate uridylyltransferase OS=Saccharomyces cerevisiae (strain ATCC 204508 / S288c) OX=559292 GN=UGP1 PE=1 SV=1
PlainYeastBread.csv	BRL_A0A8I6Z9Z3	20588000000	12018000000	28805000000	rRNA N-glycosylase OS=Hordeum vulgare subsp. vulgare OX=112509 PE=3 SV=1
PlainYeastBread.csv	WHT_A0A3B6MSN4	92493000000	179190000000	70121000000	FAD dependent oxidoreductase domain-containing protein OS=Triticum aestivum OX=4565 GN=CFC21_078315 PE=4 SV=1
PlainYeastBread.csv	CS_P53252	157140000000	380410000000	157960000000	Sphingolipid long chain base-responsive protein PIL1 OS=Saccharomyces cerevisiae (strain ATCC 204508 / S288c) OX=559292 GN=PIL1 PE=1 SV=1
PlainYeastBread.csv	WHT_Q2PCC3	330230000000	371460000000	323490000000	Type 2 non specific lipid transfer protein OS=Triticum aestivum OX=4565 GN=ltp7.1b PE=3 SV=1
PlainYeastBread.csv	CS_P14832	122300000000	1437500000000	849960000000	Peptidyl-prolyl cis-trans isomerase OS=Saccharomyces cerevisiae (strain ATCC 204508 / S288c) OX=559292 GN=CPR1 PE=1 SV=3
PlainYeastBread.csv	WHT_Q94G92	81961000000	50662000000	92532000000	Gamma gliadin-D4 OS=Triticum aestivum OX=4565 GN=Gli-1 PE=2 SV=1
PlainYeastBread.csv	WHT_A0A1D5UHV1	6598600000	23458000000	10195000000	Endoglucanase OS=Triticum aestivum OX=4565 GN=CAMPLR22A2D_LOCUS3102 PE=3 SV=1
PlainYeastBread.csv	CS_P07170	236780000000	183450000000	124360000000	Adenylate kinase OS=Saccharomyces cerevisiae (strain ATCC 204508 / S288c) OX=559292 GN=ADK1 PE=1 SV=2
PlainYeastBread.csv	WHT_A0A3B6CBE7	87770000000	1097900000000	634190000000	Histone H4 OS=Triticum aestivum OX=4565 GN=CFC21_024976 PE=3 SV=1
PlainYeastBread.csv	SOY_A0A0R0EX12	87770000000	1097900000000	634190000000	Histone H4 OS=Glycine max OX=3847 GN=100779904 PE=3 SV=1
PlainYeastBread.csv	WHT_A0A096UL77	42651000000	45729000000	26048000000	Genome assembly chromosome: II OS=Triticum aestivum OX=4565 GN=CAMPLR22A2D_LOCUS3277 PE=3 SV=1
PlainYeastBread.csv	WHT_A0A3B6MQZ0	138860000000	165380000000	91466000000	Proton pump-interactor 1 OS=Triticum aestivum OX=4565 PE=4 SV=1
PlainYeastBread.csv	SOY_C6TN36	0		1837100000	Glyceraldehyde-3-phosphate dehydrogenase OS=Glycine max OX=3847 GN=100782924 PE=2 SV=1
PlainYeastBread.csv	BRL_F2CZE7	72811000000	33269000000	17393000000	Adenosylhomocysteinase OS=Hordeum vulgare subsp. vulgare OX=112509 PE=2 SV=1
PlainYeastBread.csv	WHT_A0A3B5YVB8		6220900000		Uncharacterized protein OS=Triticum aestivum OX=4565 GN=CFC21_006083 PE=4 SV=1
PlainYeastBread.csv	WHT_A0A3B6ATJ8	211620000000	458620000000	21930000000	PA domain-containing protein OS=Triticum aestivum OX=4565 GN=CFC21_015402 PE=4 SV=1
PlainYeastBread.csv	WHT_A0A3B6PW54	4745400000	16332000000	3381600000	oligopeptidase A OS=Triticum aestivum OX=4565 GN=CFC21_090638 PE=3 SV=1
PlainYeastBread.csv	SOY_I1JMB4		0	12855000000	Glyceraldehyde-3-phosphate dehydrogenase OS=Glycine max OX=3847 GN=GLYMA_03G092700 PE=3 SV=1
PlainYeastBread.csv	WHT_W5HPC1	201670000000	353890000000	244250000000	60S acidic ribosomal protein P0 OS=Triticum aestivum OX=4565 GN=CFC21_103148 PE=3 SV=1
PlainYeastBread.csv	WHT_A0A3B6MJX3	10450000000	121940000000	91774000000	RRM domain-containing protein OS=Triticum aestivum OX=4565 PE=4 SV=1
PlainYeastBread.csv	CS_P23301	294930000000	269620000000	187650000000	Eukaryotic translation initiation factor 5A-1 OS=Saccharomyces cerevisiae (strain ATCC 204508 / S288c) OX=559292 GN=HYP2 PE=1 SV=3
PlainYeastBread.csv	CS_P39015	268610000000	206820000000	179340000000	Suppressor protein STM1 OS=Saccharomyces cerevisiae (strain ATCC 204508 / S288c) OX=559292 GN=STM1 PE=1 SV=3
PlainYeastBread.csv	CS_P15019	130050000000	27110000000	150210000000	Transaldolase OS=Saccharomyces cerevisiae (strain ATCC 204508 / S288c) OX=559292 GN=TAL1 PE=1 SV=4
PlainYeastBread.csv	WHT_A0A3B6LYY0	36026000000	76908000000	58589000000	RuBisCO large subunit-binding protein subunit alpha chloroplastic OS=Triticum aestivum OX=4565 GN=CFC21_075242 PE=3 SV=1
PlainYeastBread.csv	BRL_F2DEW5	36026000000	76908000000	58589000000	Predicted protein OS=Hordeum vulgare subsp. vulgare OX=112509 PE=2 SV=1
PlainYeastBread.csv	WHT_Q9ZRB7	0	3055100000	1811900000	Tubulin alpha chain OS=Triticum aestivum OX=4565 GN=TUBA PE=2 SV=1
PlainYeastBread.csv	CS_P00175	71444000000	115630000000	63815000000	L-lactate dehydrogenase (cytochrome) OS=Saccharomyces cerevisiae (strain ATCC 204508 / S288c) OX=559292 GN=CYB2 PE=1 SV=1
PlainYeastBread.csv	WHT_A0A3B6B781	4046800000	16974000000	4217100000	Adenosylhomocysteinase OS=Triticum aestivum OX=4565 GN=CFC21_019278 PE=3 SV=1
PlainYeastBread.csv	WHT_W5G100	125980000000	267890000000	131840000000	Pyruvate kinase OS=Triticum aestivum OX=4565 GN=CFC21_065086 PE=3 SV=1
PlainYeastBread.csv	WHT_A0A1D5UPC7	31875000000	8494000000	81577000000	Genome assembly chromosome: II OS=Triticum aestivum OX=4565 GN=CAMPLR22A2D_LOCUS2932 PE=3 SV=1
PlainYeastBread.csv	CS_P16140	71467000000	113220000000	37103000000	V-type proton ATPase subunit B OS=Saccharomyces cerevisiae (strain ATCC 204508 / S288c) OX=559292 GN=VMA2 PE=1 SV=2
PlainYeastBread.csv	CS_Q01574	89526000000	197020000000	99029000000	Acetyl-coenzyme A synthetase 1 OS=Saccharomyces cerevisiae (strain ATCC 204508 / S288c) OX=559292 GN=ACS1 PE=1 SV=2
PlainYeastBread.csv	WHT_A0A3B5XU15	101580000000	128730000000	79803000000	Outer envelope pore protein 16 chloroplastic OS=Triticum aestivum OX=4565 PE=4 SV=1
PlainYeastBread.csv	WHT_A0A3B6QIX7		20728000000	435500000	tripeptidyl-peptidase II OS=Triticum aestivum OX=4565 PE=3 SV=1
PlainYeastBread.csv	CS_P60010	117240000000	40659000000	101080000000	Actin OS=Saccharomyces cerevisiae (strain ATCC 204508 / S288c) OX=559292 GN=ACT1 PE=1 SV=1
PlainYeastBread.csv	WHT_W5FWT6	67275000000	152350000000	51644000000	aldehyde dehydrogenase (NAD(+)) OS=Triticum aestivum OX=4565 GN=ALDH7B1 PE=2 SV=1
PlainYeastBread.csv	WHT_A0A3B5XXN8	23908000000	70342000000	26191000000	Chaperonin CPN60-2 mitochondrial OS=Triticum aestivum OX=4565 PE=3 SV=1
PlainYeastBread.csv	CS_P05750	403750000000	494730000000	345630000000	Small ribosomal subunit protein uS3 OS=Saccharomyces cerevisiae (strain ATCC 204508 / S288c) OX=559292 GN=RPS3 PE=1 SV=5
PlainYeastBread.csv	WHT_A0A3B5ZWB5	89716000000	128880000000	116680000000	Nucleoside diphosphate kinase OS=Triticum aestivum OX=4565 GN=CFC21_011909 PE=3 SV=1
PlainYeastBread.csv	WHT_Q4W6G2	26039000000	27934000000	17663000000	Xylanase inhibitor XIP-III OS=Triticum aestivum OX=4565 GN=Xip-III PE=4 SV=1
PlainYeastBread.csv	CS_Q12230	150310000000	334580000000	20550000000	Sphingolipid long chain base-responsive protein LSP1 OS=Saccharomyces cerevisiae (strain ATCC 204508 / S288c) OX=559292 GN=LSP1 PE=1 SV=1
PlainYeastBread.csv	WHT_A0A3B6N0L6		31257000000	0	Ribonuclease OS=Triticum aestivum OX=4565 GN=CFC21_080831 PE=4 SV=1
PlainYeastBread.csv	WHT_P16315	1768400000000	1698600000000	4220200000000	Glutenin low molecular weight subunit PTDUCD1 OS=Triticum aestivum OX=4565 PE=1 SV=1
PlainYeastBread.csv	WHT_A0A3B6K9Q1	41613000000	75328000000	30609000000	5-methyltetrahydropteroyltriglutamate--homocysteine S-methyltransferase OS=Triticum aestivum OX=4565 GN=CFC21_063991 PE=3 SV=1
PlainYeastBread.csv	WHT_A0A3B6A087		526380000	3824100000	Uncharacterized protein OS=Triticum aestivum OX=4565 GN=CFC21_013439 PE=3 SV=1
PlainYeastBread.csv	CS_P28834	1270000000	166550000000	62254000000	Isocitrate dehydrogenase [NAD] subunit 1 mitochondrial OS=Saccharomyces cerevisiae (strain ATCC 204508 / S288c) OX=559292 GN=IDH1 PE=1 SV=2
PlainYeastBread.csv	WHT_I6QF63	902900000	9756900000	5948700000	Small heat shock protein OS=Triticum aestivum OX=4565 GN=Mds1 PE=3 SV=1
PlainYeastBread.csv	CS_P07149	121190000000	220270000000	62747000000	Fatty acid synthase subunit beta OS=Saccharomyces cerevisiae (strain ATCC 204508 / S288c) OX=559292 GN=FAS1 PE=1 SV=2
PlainYeastBread.csv	WHT_A0A3B6TB89	14169000000	20034000000	11707000000	BAG domain-containing protein OS=Triticum aestivum OX=4565 PE=4 SV=1
PlainYeastBread.csv	BRL_A0A8I6Y3C5	4236100000	0		Cupin type-1 domain-containing protein OS=Hordeum vulgare subsp. vulgare OX=112509 PE=4 SV=1
PlainYeastBread.csv	WHT_W5ECL2	451090000000	780590000000	42690000000	Large ribosomal subunit protein uL2 C-terminal domain-containing protein OS=Triticum aestivum OX=4565 GN=CFC21_052694 PE=3 SV=1
PlainYeastBread.csv	WHT_P10385	5551200000000	6806400000000	487400000000	Glutenin low molecular weight subunit OS=Triticum aestivum OX=4565 PE=3 SV=1
PlainYeastBread.csv	CS_P36060	149210000000	144410000000	123490000000	NADH-cytochrome b5 reductase 2 OS=Saccharomyces cerevisiae (strain ATCC 204508 / S288c) OX=559292 GN=MCR1 PE=1 SV=1
PlainYeastBread.csv	WHT_A0A3B5XXV7	47525000000	56396000000	27542000000	Heat shock 70 kDa protein 14 OS=Triticum aestivum OX=4565 PE=4 SV=1
PlainYeastBread.csv	CS_P23248	208190000000	348070000000	233250000000	Small ribosomal subunit protein eS1B OS=Saccharomyces cerevisiae (strain ATCC 204508 / S288c) OX=559292 GN=RPS1B PE=1 SV=3
PlainYeastBread.csv	CRAP_CAS2	336280000000	428680000000	552860000000	CRAP_CAS2_BOVIN
PlainYeastBread.csv	WHT_A0A3B6DDS7	6977700000	0	3537900000	1 4-alpha-glucan branching enzyme OS=Triticum aestivum OX=4565 GN=CFC21_030196 PE=3 SV=1
PlainYeastBread.csv	CS_P00331	86907000000	12450000000	78259000000	Alcohol dehydrogenase 2 OS=Saccharomyces cerevisiae (strain ATCC 204508 / S288c) OX=559292 GN=ADH2 PE=1 SV=3
PlainYeastBread.csv	CS_P00817	146750000000	202720000000	46517000000	Inorganic pyrophosphatase OS=Saccharomyces cerevisiae (strain ATCC 204508 / S288c) OX=559292 GN=IPP1 PE=1 SV=4
PlainYeastBread.csv	CS_P19657	4226000000	107080000000	53073000000	Plasma membrane ATPase 2 OS=Saccharomyces cerevisiae (strain ATCC 204508 / S288c) OX=559292 GN=PMA2 PE=1 SV=3
PlainYeastBread.csv	WHT_A0A3B5YWB5	141190000000	2460000000	130960000000	Secretory protein OS=Triticum aestivum OX=4565 GN=CFC21_006536 PE=4 SV=1
PlainYeastBread.csv	WHT_A0A3B6JEG9	0	25356000000	0	Formate dehydrogenase mitochondrial OS=Triticum aestivum OX=4565 GN=CFC21_060041 PE=3 SV=1
PlainYeastBread.csv	WHT_A0A1K0JNG6	94240000000	1320800000000	818210000000	Alpha-gliadin OS=Triticum aestivum OX=4565 GN=Gli-D2-15 PE=4 SV=1
PlainYeastBread.csv	WHT_A0A3B6CE61	83655000000	216530000000	133270000000	Uncharacterized protein OS=Triticum aestivum OX=4565 GN=CFC21_025080 PE=4 SV=1
PlainYeastBread.csv	CS_P30952	124050000000	174740000000	110810000000	Malate synthase 1 OS=Saccharomyces cerevisiae (strain ATCC 204508 / S288c) OX=559292 GN=MLS1 PE=1 SV=1
PlainYeastBread.csv	WHT_A0A3B6U437	613170000000	615270000000	324950000000	SHSP domain-containing protein OS=Triticum aestivum OX=4565 PE=3 SV=1
PlainYeastBread.csv	BRL_A0A8I6WDV9	231860000000	22430000000	168880000000	Histone H3 OS=Hordeum vulgare subsp. vulgare OX=112509 PE=3 SV=1
PlainYeastBread.csv	WHT_A0A3B6IUN7	231860000000	22430000000	168880000000	Histone H2A/H2B/H3 domain-containing protein OS=Triticum aestivum OX=4565 PE=3 SV=1
PlainYeastBread.csv	CS_P06738	1054000000	57935000000	13639000000	Glycogen phosphorylase OS=Saccharomyces cerevisiae (strain ATCC 204508 / S288c) OX=559292 GN=GPH1 PE=1 SV=4
PlainYeastBread.csv	CS_P25694	52991000000	91494000000	29649000000	Cell division control protein 48 OS=Saccharomyces cerevisiae (strain ATCC 204508 / S288c) OX=559292 GN=CDC48 PE=1 SV=3
PlainYeastBread.csv	WHT_A0A3B6PT84	56412000000	219930000000	145850000000	Aconitate hydratase OS=Triticum aestivum OX=4565 GN=CFC21_090270 PE=3 SV=1
PlainYeastBread.csv	CS_P11154	897810000	30798000000	11066000000	Pyruvate carboxylase 1 OS=Saccharomyces cerevisiae (strain ATCC 204508 / S288c) OX=559292 GN=PYC1 PE=1 SV=2
PlainYeastBread.csv	WHT_A0A3B6R7B8	383060000000	392650000000	190020000000	Bifunctional inhibitor/plant lipid transfer protein/seed storage helical domain-containing protein OS=Triticum aestivum OX=4565 GN=CFC21_095327 PE=4 SV=1
PlainYeastBread.csv	BRL_F2CXB2	3753300000	0	15193000000	aldehyde dehydrogenase (NAD(+)) OS=Hordeum vulgare subsp. vulgare OX=112509 PE=2 SV=1
PlainYeastBread.csv	CS_P20967	72112000000	110130000000	35894000000	2-oxoglutarate dehydrogenase mitochondrial OS=Saccharomyces cerevisiae (strain ATCC 204508 / S288c) OX=559292 GN=KGD1 PE=1 SV=2
PlainYeastBread.csv	CS_P32327	13431000000	444200000	2300800000	Pyruvate carboxylase 2 OS=Saccharomyces cerevisiae (strain ATCC 204508 / S288c) OX=559292 GN=PYC2 PE=1 SV=2
PlainYeastBread.csv	BRL_A0A8I6X4L0		0	0	Beta-amylase OS=Hordeum vulgare subsp. vulgare OX=112509 PE=3 SV=1
PlainYeastBread.csv	WHT_A0A3B6PG25	16219000000	9807600000	6698900000	cellulase OS=Triticum aestivum OX=4565 GN=CFC21_087073 PE=3 SV=1
PlainYeastBread.csv	WHT_W5E2W7	32609000000	14840000000	53725000000	Small ribosomal subunit protein uS2 OS=Triticum aestivum OX=4565 GN=CFC21_058947 PE=3 SV=1
PlainYeastBread.csv	BRL_A0A8I6XB73	63302000000	85691000000	39643000000	Pectin acetylesterase OS=Hordeum vulgare subsp. vulgare OX=112509 PE=3 SV=1
PlainYeastBread.csv	WHT_A0A3B6LLB0	24058000000	68792000000	3203000000	formate--tetrahydrofolate ligase OS=Triticum aestivum OX=4565 GN=CFC21_071852 PE=3 SV=1
PlainYeastBread.csv	WHT_A0A3B6TJZ4	98657000000	218330000000	12970000000	Starch synthase chloroplastic/amyloplastic OS=Triticum aestivum OX=4565 PE=3 SV=1
PlainYeastBread.csv	WHT_A0A3B6LT32		0		ATP synthase subunit alpha OS=Triticum aestivum OX=4565 GN=CFC21_073490 PE=3 SV=1
PlainYeastBread.csv	WHT_W5D2J1	50928000000	65259000000	3575000000	Importin subunit alpha OS=Triticum aestivum OX=4565 GN=CFC21_034976 PE=3 SV=1
PlainYeastBread.csv	BRL_A0A287KQT4	50928000000	65259000000	3575000000	Importin subunit alpha OS=Hordeum vulgare subsp. vulgare OX=112509 PE=3 SV=1
PlainYeastBread.csv	WHT_A0A3B6FL79	50928000000	65259000000	3575000000	Importin subunit alpha OS=Triticum aestivum OX=4565 GN=CFC21_040947 PE=3 SV=1
PlainYeastBread.csv	WHT_A0A3B6HQ83	39157000000	91232000000	58791000000	L-ascorbate peroxidase OS=Triticum aestivum OX=4565 GN=CFC21_051863 PE=3 SV=1
PlainYeastBread.csv	BRL_A0A8I6XP22	4877400000	17096000000	7313700000	formate--tetrahydrofolate ligase OS=Hordeum vulgare subsp. vulgare OX=112509 PE=3 SV=1
PlainYeastBread.csv	WHT_A0A3B6N0N5	194690000000	424710000000	198510000000	S5 DRBM domain-containing protein OS=Triticum aestivum OX=4565 GN=CFC21_080285 PE=3 SV=1
PlainYeastBread.csv	WHT_W5BVA4	76329000000	98377000000	68309000000	Calreticulin OS=Triticum aestivum OX=4565 GN=CAMPLR22A2D_LOCUS5386 PE=3 SV=1
PlainYeastBread.csv	WHT_A0A3B5Y2A7	195370000000	248240000000	156820000000	Uncharacterized protein OS=Triticum aestivum OX=4565 PE=3 SV=1
PlainYeastBread.csv	WHT_A0A3B6ISW5	138070000000	237490000000	139160000000	Uncharacterized protein OS=Triticum aestivum OX=4565 GN=CFC21_057731 PE=3 SV=1
PlainYeastBread.csv	WHT_A0A3B6PF71	93726000000	9223000000	87137000000	Uncharacterized protein OS=Triticum aestivum OX=4565 PE=4 SV=1
PlainYeastBread.csv	CS_Q12122	9703700000	16625000000	5842200000	Homocitrate synthase mitochondrial OS=Saccharomyces cerevisiae (strain ATCC 204508 / S288c) OX=559292 GN=LYS21 PE=1 SV=1
PlainYeastBread.csv	CS_P33315	85131000000	193530000000	100040000000	Transketolase 2 OS=Saccharomyces cerevisiae (strain ATCC 204508 / S288c) OX=559292 GN=TKL2 PE=1 SV=1
PlainYeastBread.csv	WHT_W5GVR2	218150000000	365050000000	14840000000	60S ribosomal protein L6 OS=Triticum aestivum OX=4565 GN=CFC21_083486 PE=3 SV=1
PlainYeastBread.csv	BRL_F2ECH4	50675000000	7991000000	29079000000	Predicted protein OS=Hordeum vulgare subsp. vulgare OX=112509 PE=2 SV=1
PlainYeastBread.csv	CS_P23641	48821000000	52667000000	40256000000	Mitochondrial phosphate carrier protein OS=Saccharomyces cerevisiae (strain ATCC 204508 / S288c) OX=559292 GN=MIR1 PE=1 SV=1
PlainYeastBread.csv	WHT_A0A3B6DB70	246940000000	436160000000	333160000000	Translation elongation factor EF1B beta/delta subunit guanine nucleotide exchange domain-containing protein OS=Triticum aestivum OX=4565 GN=CFC21_028305 PE=3 SV=1
PlainYeastBread.csv	WHT_A0A3B6MTU9	6995200000	15187000000	740800000	Proton pump-interactor 1 OS=Triticum aestivum OX=4565 PE=4 SV=1
PlainYeastBread.csv	CS_P26263	23339000000	30844000000	13273000000	Pyruvate decarboxylase isozyme 3 OS=Saccharomyces cerevisiae (strain ATCC 204508 / S288c) OX=559292 GN=PDC6 PE=1 SV=3
PlainYeastBread.csv	CS_P00445	749280000000	8240000000	583490000000	Superoxide dismutase [Cu-Zn] OS=Saccharomyces cerevisiae (strain ATCC 204508 / S288c) OX=559292 GN=SOD1 PE=1 SV=2
PlainYeastBread.csv	BRL_A0A8I6WEQ3	26904000000	119200000	0	Uncharacterized protein OS=Hordeum vulgare subsp. vulgare OX=112509 PE=4 SV=1
PlainYeastBread.csv	WHT_M9TE79	786330000000	175300000000	760840000000	Gamma gliadin-B1 OS=Triticum aestivum OX=4565 GN=Gli-1 PE=2 SV=1
PlainYeastBread.csv	WHT_A0A3B6GPK1	37625000000	42242000000	27531000000	SHSP domain-containing protein OS=Triticum aestivum OX=4565 GN=CFC21_045577 PE=3 SV=1
PlainYeastBread.csv	WHT_A0A3B6H0L0	192920000000	239480000000	150590000000	phosphoglycerate mutase (2 3-diphosphoglycerate-independent) OS=Triticum aestivum OX=4565 PE=3 SV=1
PlainYeastBread.csv	WHT_A0A3B6DKQ2	9740200000	4349000000	26449000000	Nucleoredoxin OS=Triticum aestivum OX=4565 GN=NRX1-2DL PE=2 SV=1
PlainYeastBread.csv	WHT_A0A3B6DDW7	57901000000	884000000	50259000000	Uncharacterized protein OS=Triticum aestivum OX=4565 GN=CFC21_030223 PE=3 SV=1
PlainYeastBread.csv	WHT_B2LXU4	56758000000	133250000000	74994000000	Alpha-1 4 glucan phosphorylase OS=Triticum aestivum OX=4565 GN=Pho1 PE=2 SV=1
PlainYeastBread.csv	CS_P50095	39325000000	75455000000	2666000000	Inosine-5'-monophosphate dehydrogenase 3 OS=Saccharomyces cerevisiae (strain ATCC 204508 / S288c) OX=559292 GN=IMD3 PE=1 SV=1
PlainYeastBread.csv	WHT_A0A3B5ZVX4	2019800000	25611000000	36239000000	Uncharacterized protein OS=Triticum aestivum OX=4565 GN=CFC21_012134 PE=4 SV=1
PlainYeastBread.csv	CS_P17076	279840000000	3460000000	164350000000	Large ribosomal subunit protein eL8A OS=Saccharomyces cerevisiae (strain ATCC 204508 / S288c) OX=559292 GN=RPL8A PE=1 SV=4
PlainYeastBread.csv	WHT_A0A3B6JNU8	175640000000	234030000000	167490000000	Small ribosomal subunit protein eS1 OS=Triticum aestivum OX=4565 GN=CFC21_062658 PE=3 SV=1
PlainYeastBread.csv	BRL_F2CS51	2422300000	3665200000	1052300000	Pyruvate kinase OS=Hordeum vulgare subsp. vulgare OX=112509 PE=2 SV=1
PlainYeastBread.csv	WHT_A0A3B6KPK9	161070000000	315810000000	148270000000	Beta-glucosidase OS=Triticum aestivum OX=4565 GN=CFC21_067669 PE=4 SV=1
PlainYeastBread.csv	WHT_A0A0K2QJY6	459990000000	1061700000000	413960000000	Alpha/beta-gliadin OS=Triticum aestivum OX=4565 GN=Gli-2 PE=4 SV=1
PlainYeastBread.csv	BRL_F2DIF8	142410000000	135240000000	62055000000	Pyrophosphate--fructose 6-phosphate 1-phosphotransferase subunit alpha OS=Hordeum vulgare subsp. vulgare OX=112509 GN=PFP-ALPHA PE=2 SV=1
PlainYeastBread.csv	WHT_W5CWR9	78434000000	121390000000	52016000000	NADP-dependent oxidoreductase domain-containing protein OS=Triticum aestivum OX=4565 GN=CFC21_041453 PE=4 SV=1
PlainYeastBread.csv	WHT_A0A3B6A2J7	39189000000	65542000000	33963000000	Aspartic proteinase OS=Triticum aestivum OX=4565 GN=CFC21_013850 PE=3 SV=1
PlainYeastBread.csv	WHT_A0A3B6FF92	124510000000	44970000000	166020000000	Uncharacterized protein OS=Triticum aestivum OX=4565 GN=CFC21_039252 PE=3 SV=1
PlainYeastBread.csv	CS_P25443	69152000000	145910000000	106850000000	Small ribosomal subunit protein uS5 OS=Saccharomyces cerevisiae (strain ATCC 204508 / S288c) OX=559292 GN=RPS2 PE=1 SV=3
PlainYeastBread.csv	BRL_A0A8I6XAG3			4830400000	1 4-alpha-glucan branching enzyme OS=Hordeum vulgare subsp. vulgare OX=112509 PE=3 SV=1
PlainYeastBread.csv	CS_P17255	29246000000	122710000000	37116000000	V-type proton ATPase catalytic subunit A OS=Saccharomyces cerevisiae (strain ATCC 204508 / S288c) OX=559292 GN=VMA1 PE=1 SV=3
PlainYeastBread.csv	CS_P46654	535650000000	810820000000	251110000000	Small ribosomal subunit protein uS2B OS=Saccharomyces cerevisiae (strain ATCC 204508 / S288c) OX=559292 GN=RPS0B PE=1 SV=2
PlainYeastBread.csv	WHT_A0A1D6B2M0	70896000000	107080000000	64041000000	Succinate--CoA ligase [ADP-forming] subunit beta mitochondrial OS=Triticum aestivum OX=4565 GN=CFC21_083678 PE=3 SV=1
PlainYeastBread.csv	WHT_A0A1D6DKF8	384810000000	581860000000	25920000000	Uncharacterized protein OS=Triticum aestivum OX=4565 GN=CFC21_097319 PE=3 SV=1
PlainYeastBread.csv	CS_Q08911	13460000000	201530000000	106280000000	Formate dehydrogenase 1 OS=Saccharomyces cerevisiae (strain ATCC 204508 / S288c) OX=559292 GN=FDH1 PE=1 SV=1
PlainYeastBread.csv	WHT_A1EHE7	2458500000000	4047600000000	2659400000000	Gamma gliadin-D3 OS=Triticum aestivum OX=4565 GN=Gli-1 PE=2 SV=1
PlainYeastBread.csv	CS_P53319	30952000000	98335000000	38266000000	6-phosphogluconate dehydrogenase decarboxylating 2 OS=Saccharomyces cerevisiae (strain ATCC 204508 / S288c) OX=559292 GN=GND2 PE=1 SV=1
PlainYeastBread.csv	WHT_A0A3B6FP91	24100000	17884000000	7898700000	Uncharacterized protein OS=Triticum aestivum OX=4565 GN=CFC21_041099 PE=4 SV=1
PlainYeastBread.csv	WHT_A0A3B6TID0	20857000000	103270000000	15058000000	transketolase OS=Triticum aestivum OX=4565 GN=CFC21_107034 PE=3 SV=1
PlainYeastBread.csv	BRL_A0A8I6Y879	20857000000	103270000000	15058000000	transketolase OS=Hordeum vulgare subsp. vulgare OX=112509 PE=3 SV=1
PlainYeastBread.csv	WHT_A0A3B6I494	30269000000	3034000000	152330000	Bifunctional inhibitor/plant lipid transfer protein/seed storage helical domain-containing protein OS=Triticum aestivum OX=4565 GN=CFC21_055389 PE=4 SV=1
PlainYeastBread.csv	CS_P10963	24987000000	74328000000	31549000000	Phosphoenolpyruvate carboxykinase (ATP) OS=Saccharomyces cerevisiae (strain ATCC 204508 / S288c) OX=559292 GN=PCK1 PE=1 SV=2
PlainYeastBread.csv	CS_Q3E754	20040000000	173640000000	152730000000	Small ribosomal subunit protein eS21B OS=Saccharomyces cerevisiae (strain ATCC 204508 / S288c) OX=559292 GN=RPS21B PE=1 SV=1
PlainYeastBread.csv	SOY_I1N7G7		0		Glyceraldehyde-3-phosphate dehydrogenase OS=Glycine max OX=3847 GN=100810217 PE=3 SV=1
PlainYeastBread.csv	CS_P07256	89994000000	128750000000	69119000000	Cytochrome b-c1 complex subunit 1 mitochondrial OS=Saccharomyces cerevisiae (strain ATCC 204508 / S288c) OX=559292 GN=COR1 PE=1 SV=1
PlainYeastBread.csv	CS_P26786	1390000000	165580000000	98049000000	Small ribosomal subunit protein eS7A OS=Saccharomyces cerevisiae (strain ATCC 204508 / S288c) OX=559292 GN=RPS7A PE=1 SV=4
PlainYeastBread.csv	WHT_A0A3B5Y1Z9	2873700000	11011000000	2800800000	CRAL-TRIO domain-containing protein OS=Triticum aestivum OX=4565 PE=3 SV=1
PlainYeastBread.csv	BRL_F2CSC5	6233200000	65461000000	43705000000	Ribosomal protein L19 OS=Hordeum vulgare subsp. vulgare OX=112509 PE=2 SV=1
PlainYeastBread.csv	WHT_A0A3B6MQ77	58311000000	198980000000	4229000000	Trehalose 6-phosphate phosphatase OS=Triticum aestivum OX=4565 GN=CFC21_077565 PE=3 SV=1
PlainYeastBread.csv	WHT_A0A3B5Y2C9	221430000000	308180000000	166750000000	UspA domain-containing protein OS=Triticum aestivum OX=4565 PE=4 SV=1
PlainYeastBread.csv	WHT_A0A3B6JDS9	2017100000	1131700000	1821100000	Serpin domain-containing protein OS=Triticum aestivum OX=4565 GN=CFC21_060766 PE=3 SV=1
PlainYeastBread.csv	WHT_A0A3B6GTN3	73043000000	73442000000	68491000000	Isocitrate dehydrogenase [NADP] OS=Triticum aestivum OX=4565 GN=CFC21_047534 PE=3 SV=1
PlainYeastBread.csv	BRL_A0A8I6XZL8	73043000000	73442000000	68491000000	Isocitrate dehydrogenase [NADP] OS=Hordeum vulgare subsp. vulgare OX=112509 PE=3 SV=1
PlainYeastBread.csv	CS_P05759	11367000000	12488000000	2464500000	Ubiquitin-ribosomal protein eS31 fusion protein OS=Saccharomyces cerevisiae (strain ATCC 204508 / S288c) OX=559292 GN=RPS31 PE=1 SV=3
PlainYeastBread.csv	CS_Q07551	123580000000	239330000000	120460000000	NADPH-dependent alpha-keto amide reductase OS=Saccharomyces cerevisiae (strain ATCC 204508 / S288c) OX=559292 GN=YDL124W PE=1 SV=1
PlainYeastBread.csv	WHT_Q5I7K4	165160000000	268430000000	165530000000	Ribosomal protein L17 OS=Triticum aestivum OX=4565 GN=CFC21_006360 PE=1 SV=1
PlainYeastBread.csv	WHT_A0A3B6PNU4	788580000000	845750000000	500980000000	Bifunctional inhibitor/plant lipid transfer protein/seed storage helical domain-containing protein OS=Triticum aestivum OX=4565 GN=CFC21_088765 PE=3 SV=1
PlainYeastBread.csv	WHT_A0A3B6FIX9	83909000000	153010000000	59743000000	glutamine--tRNA ligase OS=Triticum aestivum OX=4565 PE=3 SV=1
PlainYeastBread.csv	WHT_A0A3B6LUD2	7947000000	58118000000	24057000000	Inosine-5'-monophosphate dehydrogenase OS=Triticum aestivum OX=4565 GN=CFC21_073775 PE=3 SV=1
PlainYeastBread.csv	CS_P17695	112590000000	182510000000	87421000000	Glutaredoxin-2 OS=Saccharomyces cerevisiae (strain ATCC 204508 / S288c) OX=559292 GN=GRX2 PE=1 SV=3
PlainYeastBread.csv	CS_P15705	12637000000	45905000000	25362000000	Heat shock protein STI1 OS=Saccharomyces cerevisiae (strain ATCC 204508 / S288c) OX=559292 GN=STI1 PE=1 SV=1
PlainYeastBread.csv	WHT_A0A3B6EGE6	2754000000	52672000000	17479000000	Malate dehydrogenase OS=Triticum aestivum OX=4565 PE=3 SV=1
PlainYeastBread.csv	WHT_A0A3B5Z0A0	22129000000	73679000000	46474000000	Uncharacterized protein OS=Triticum aestivum OX=4565 PE=4 SV=1
PlainYeastBread.csv	WHT_A0A2U8JD37	629740000000	1229300000000	680040000000	Delta gliadin-D1 OS=Triticum aestivum OX=4565 GN=Gli-1 PE=4 SV=1
PlainYeastBread.csv	WHT_A0A3B6C9E7	949300000	21447000000	3794300000	Glutaredoxin domain-containing protein OS=Triticum aestivum OX=4565 PE=1 SV=1
PlainYeastBread.csv	WHT_A0A3B6AUH5	1875000000	28408000000	20624000000	Translation elongation factor EF1B beta/delta subunit guanine nucleotide exchange domain-containing protein OS=Triticum aestivum OX=4565 GN=CFC21_016044 PE=3 SV=1
PlainYeastBread.csv	CS_P41940	88021000000	82953000000	61672000000	Mannose-1-phosphate guanyltransferase OS=Saccharomyces cerevisiae (strain ATCC 204508 / S288c) OX=559292 GN=PSA1 PE=1 SV=2
PlainYeastBread.csv	WHT_A0A2X0S376	513600000	565400000	4040100000	Genome assembly chromosome: II OS=Triticum aestivum OX=4565 GN=CAMPLR22A2D_LOCUS1640 PE=3 SV=1
PlainYeastBread.csv	WHT_A0A3B6DJC6	49455000000	128280000000	63765000000	methylmalonate-semialdehyde dehydrogenase (CoA acylating) OS=Triticum aestivum OX=4565 GN=CFC21_031878 PE=3 SV=1
PlainYeastBread.csv	CS_P02407	361380000000	700190000000	260090000000	Small ribosomal subunit protein eS17A OS=Saccharomyces cerevisiae (strain ATCC 204508 / S288c) OX=559292 GN=RPS17A PE=1 SV=1
PlainYeastBread.csv	WHT_A0A3B6EGI5	133910000000	271590000000	1070000000	Carbonic anhydrase OS=Triticum aestivum OX=4565 GN=CFC21_035559 PE=3 SV=1
PlainYeastBread.csv	WHT_A0A3B6LNG5	28735000000	72537000000	29026000000	Histidine kinase/HSP90-like ATPase domain-containing protein OS=Triticum aestivum OX=4565 GN=CFC21_072045 PE=3 SV=1
PlainYeastBread.csv	WHT_D8L9B3	106280000000	117360000000	90966000000	Protein disulfide isomerase family protein 4-1 OS=Triticum aestivum OX=4565 GN=pdil4-1 PE=2 SV=1
PlainYeastBread.csv	WHT_A0A3B6GQS5	24156000000	2512000000	14046000000	Translocon-associated protein subunit beta OS=Triticum aestivum OX=4565 GN=CFC21_045973 PE=4 SV=1
PlainYeastBread.csv	WHT_A0A3B6GVC0	24363000000	71881000000	29172000000	Uncharacterized protein OS=Triticum aestivum OX=4565 GN=CFC21_047037 PE=3 SV=1
PlainYeastBread.csv	WHT_Q3S4I1	3766000000	85424000000	54871000000	Eukaryotic translation initiation factor 5A OS=Triticum aestivum OX=4565 GN=CAMPLR22A2D_LOCUS2580 PE=3 SV=1
PlainYeastBread.csv	CS_P0CX83	111050000000	141230000000	15030000000	Large ribosomal subunit protein eL19 OS=Saccharomyces cerevisiae (strain ATCC 204508 / S288c) OX=559292 GN=RPL19B PE=1 SV=1
PlainYeastBread.csv	CS_P39954	96128000000	182870000000	132910000000	Adenosylhomocysteinase OS=Saccharomyces cerevisiae (strain ATCC 204508 / S288c) OX=559292 GN=SAH1 PE=1 SV=1
PlainYeastBread.csv	WHT_P55313	119540000000	232330000000	90506000000	Catalase OS=Triticum aestivum OX=4565 GN=CATA PE=2 SV=1
PlainYeastBread.csv	BRL_F2CPL2	119540000000	232330000000	90506000000	Catalase OS=Hordeum vulgare subsp. vulgare OX=112509 PE=2 SV=1
PlainYeastBread.csv	WHT_A0A3B6QMZ5	44035000000	10740000000	25539000000	Cytosol aminopeptidase domain-containing protein OS=Triticum aestivum OX=4565 GN=CFC21_094224 PE=3 SV=1
PlainYeastBread.csv	CS_P28241	36194000000	51439000000	37077000000	Isocitrate dehydrogenase [NAD] subunit 2 mitochondrial OS=Saccharomyces cerevisiae (strain ATCC 204508 / S288c) OX=559292 GN=IDH2 PE=1 SV=1
PlainYeastBread.csv	WHT_A0A3B6N018	19131000000	32704000000	15381000000	RNA helicase OS=Triticum aestivum OX=4565 GN=CFC21_080232 PE=4 SV=1
PlainYeastBread.csv	WHT_A0A3B6KDQ4	35947000000	45179000000	31683000000	adenylate kinase OS=Triticum aestivum OX=4565 GN=CFC21_064986 PE=3 SV=1
PlainYeastBread.csv	WHT_A0A3B6JPZ3	3557800000	7189000000	6190800000	Chaperonin CPN60-2 mitochondrial OS=Triticum aestivum OX=4565 GN=CFC21_063093 PE=3 SV=1
PlainYeastBread.csv	CRAP_K1C9	113840000000	10964000000	4788000000	CRAP_K1C9_HUMAN
PlainYeastBread.csv	WHT_A0A3B6KLS3	18839000000	73442000000	26676000000	Enoyl reductase (ER) domain-containing protein OS=Triticum aestivum OX=4565 GN=CFC21_066778 PE=4 SV=1
PlainYeastBread.csv	CS_P20081	402310000000	475030000000	291060000000	FK506-binding protein 1 OS=Saccharomyces cerevisiae (strain ATCC 204508 / S288c) OX=559292 GN=FPR1 PE=1 SV=2
PlainYeastBread.csv	WHT_A0A3B6GTM0	2597000000	0	10029000000	Uncharacterized protein OS=Triticum aestivum OX=4565 GN=CFC21_047884 PE=3 SV=1
PlainYeastBread.csv	WHT_A0A3B6B2S4	32164000000	50377000000	24477000000	STI1 domain-containing protein OS=Triticum aestivum OX=4565 PE=4 SV=1
PlainYeastBread.csv	WHT_A0A1D5ZVN9	137990000000	363440000000	299630000000	Bowman-Birk serine protease inhibitors family domain-containing protein OS=Triticum aestivum OX=4565 GN=CFC21_007221 PE=4 SV=1
PlainYeastBread.csv	SOY_I1NII0	1572400000000	1541600000000	1295400000000	Starch synthase chloroplastic/amyloplastic OS=Glycine max OX=3847 GN=100787590 PE=3 SV=2
PlainYeastBread.csv	BRL_A0A8I6WNF6	8420800000000	9387700000000	5770100000000	Bifunctional inhibitor/plant lipid transfer protein/seed storage helical domain-containing protein OS=Hordeum vulgare subsp. vulgare OX=112509 PE=4 SV=1
PlainYeastBread.csv	WHT_A0A3B6JIQ3	22092000000	36482000000	15909000000	VOC domain-containing protein OS=Triticum aestivum OX=4565 GN=CFC21_062103 PE=4 SV=1
PlainYeastBread.csv	BRL_F2CR90	14841000000	52355000000	32853000000	Predicted protein OS=Hordeum vulgare subsp. vulgare OX=112509 PE=2 SV=1
PlainYeastBread.csv	WHT_A0A3B6HSB4	12636000000	20103000000	7629900000	Heat shock protein 70 OS=Triticum aestivum OX=4565 GN=CFC21_051460 PE=3 SV=1
PlainYeastBread.csv	WHT_M4VP35	34618000000	93217000000	63966000000	Bowman-Birk serine protease inhibitors family domain-containing protein OS=Triticum aestivum OX=4565 GN=UES PE=2 SV=1
PlainYeastBread.csv	CS_P32582	7495800000	88209000000	29474000000	Cystathionine beta-synthase OS=Saccharomyces cerevisiae (strain ATCC 204508 / S288c) OX=559292 GN=CYS4 PE=1 SV=1
PlainYeastBread.csv	WHT_A0A3B6SJ26	22294000000	44295000000	21907000000	adenylate kinase OS=Triticum aestivum OX=4565 GN=CFC21_103994 PE=3 SV=1
PlainYeastBread.csv	WHT_A0A3B6TBW8	22213000000	69465000000	30564000000	RuBisCO large subunit-binding protein subunit beta chloroplastic OS=Triticum aestivum OX=4565 GN=CFC21_106676 PE=3 SV=1
PlainYeastBread.csv	CS_Q3E841	152510000000	224540000000	105770000000	Uncharacterized protein YNR034W-A OS=Saccharomyces cerevisiae (strain ATCC 204508 / S288c) OX=559292 GN=YNR034W-A PE=1 SV=1
PlainYeastBread.csv	WHT_A0A3B6KHQ4	683480000000	1101600000000	559080000000	40S ribosomal protein S19 OS=Triticum aestivum OX=4565 GN=CFC21_065464 PE=3 SV=1
PlainYeastBread.csv	WHT_A0A3B6HRY3	14012000000	429000000	16354000000	Protein transport protein SEC23 OS=Triticum aestivum OX=4565 GN=CFC21_052323 PE=3 SV=1
PlainYeastBread.csv	WHT_A0A3B5YSY9	23998000000	31015000000	18214000000	Carboxypeptidase OS=Triticum aestivum OX=4565 PE=3 SV=1
PlainYeastBread.csv	CS_P38158	48137000000	92925000000	66335000000	Alpha-glucosidase MAL32 OS=Saccharomyces cerevisiae (strain ATCC 204508 / S288c) OX=559292 GN=MAL32 PE=1 SV=1
PlainYeastBread.csv	CS_P37012	9729000000	19880000000	115890000000	Phosphoglucomutase 2 OS=Saccharomyces cerevisiae (strain ATCC 204508 / S288c) OX=559292 GN=PGM2 PE=1 SV=1
PlainYeastBread.csv	WHT_W5CVF8	2759800000	22308000000	8391600000	SHSP domain-containing protein OS=Triticum aestivum OX=4565 GN=CFC21_040228 PE=3 SV=1
PlainYeastBread.csv	WHT_A0A3B6GNZ4	5553200000	1108800000	0	SHSP domain-containing protein OS=Triticum aestivum OX=4565 GN=CFC21_046296 PE=3 SV=1
PlainYeastBread.csv	BRL_A0A8I6Y5V6	38027000000	71791000000	30107000000	AAA+ ATPase domain-containing protein OS=Hordeum vulgare subsp. vulgare OX=112509 PE=3 SV=1
PlainYeastBread.csv	CS_P38011	173540000000	207050000000	126920000000	Small ribosomal subunit protein RACK1 OS=Saccharomyces cerevisiae (strain ATCC 204508 / S288c) OX=559292 GN=ASC1 PE=1 SV=4
PlainYeastBread.csv	WHT_Q9ZR70	152580000000	112010000000	83967000000	Em protein OS=Triticum aestivum OX=4565 GN=Em-D1 PE=3 SV=1
PlainYeastBread.csv	WHT_A0A3B6QC70	271000000	25105000000	24675000000	Uncharacterized protein OS=Triticum aestivum OX=4565 PE=4 SV=1
PlainYeastBread.csv	WHT_A0A3B6JJG2	0	12028000000	8335900000	SHSP domain-containing protein OS=Triticum aestivum OX=4565 GN=CFC21_061438 PE=3 SV=1
PlainYeastBread.csv	BRL_A0A8I6Y493	7961800000	56416000000	39342000000	Bifunctional inhibitor/plant lipid transfer protein/seed storage helical domain-containing protein OS=Hordeum vulgare subsp. vulgare OX=112509 PE=4 SV=1
PlainYeastBread.csv	WHT_A0A3B6RGD2	6182800000	42926000000	19247000000	Ubiquitin receptor RAD23 OS=Triticum aestivum OX=4565 GN=CFC21_097084 PE=3 SV=1
PlainYeastBread.csv	WHT_A0A1D5UXT7	18416000000	8486700000	1991000000	Cysteine proteinase inhibitor OS=Triticum aestivum OX=4565 GN=CAMPLR22A2D_LOCUS1134 PE=3 SV=1
PlainYeastBread.csv	WHT_A0A3B6KN68	42048000000	80861000000	27518000000	Glutathione S-transferase OS=Triticum aestivum OX=4565 GN=CFC21_068044 PE=3 SV=1
PlainYeastBread.csv	BRL_A0A8I6WYH3	815950000	11210000000		SHSP domain-containing protein OS=Hordeum vulgare subsp. vulgare OX=112509 PE=3 SV=1
PlainYeastBread.csv	WHT_P81713	624060000000	838520000000	578770000000	Bowman-Birk type trypsin inhibitor OS=Triticum aestivum OX=4565 PE=1 SV=1
PlainYeastBread.csv	WHT_A0A3B5XU98	2532200000	22887000000	2724600000	Glucose-6-phosphate isomerase OS=Triticum aestivum OX=4565 PE=3 SV=1
PlainYeastBread.csv	WHT_P04726		21105000000	1423000000	Alpha/beta-gliadin clone PW1215 OS=Triticum aestivum OX=4565 PE=3 SV=1
PlainYeastBread.csv	WHT_A0A3B6KP24	95631000000	143760000000	79571000000	Large ribosomal subunit protein uL18 C-terminal eukaryotes domain-containing protein OS=Triticum aestivum OX=4565 PE=3 SV=1
PlainYeastBread.csv	WHT_A0A3B6NQ47	64183000000	15870000000	80715000000	Uncharacterized protein OS=Triticum aestivum OX=4565 GN=CFC21_083163 PE=3 SV=1
PlainYeastBread.csv	CS_Q08969	87111000000	171030000000	15030000000	Protein GRE1 OS=Saccharomyces cerevisiae (strain ATCC 204508 / S288c) OX=559292 GN=GRE1 PE=1 SV=1
PlainYeastBread.csv	WHT_A0A3B6D5N6	16421000000	1780000000	11720000000	40S ribosomal protein S6 OS=Triticum aestivum OX=4565 PE=3 SV=1
PlainYeastBread.csv	CS_P38219	97334000000	131090000000	58344000000	Obg-like ATPase 1 OS=Saccharomyces cerevisiae (strain ATCC 204508 / S288c) OX=559292 GN=OLA1 PE=1 SV=1
PlainYeastBread.csv	WHT_A0A3B5XYS8	11701000000	17275000000	11197000000	Uncharacterized protein OS=Triticum aestivum OX=4565 PE=4 SV=1
PlainYeastBread.csv	WHT_A0A3B6EFK5	9937200000	20934000000	11929000000	Uncharacterized protein OS=Triticum aestivum OX=4565 GN=CFC21_035140 PE=3 SV=1
PlainYeastBread.csv	CS_P08536	56581000000	115410000000	30011000000	Sulfate adenylyltransferase OS=Saccharomyces cerevisiae (strain ATCC 204508 / S288c) OX=559292 GN=MET3 PE=1 SV=2
PlainYeastBread.csv	WHT_A0A3B6IRR8	4931000000	31838000000	24698000000	Gamma-interferon-inducible lysosomal thiol reductase OS=Triticum aestivum OX=4565 GN=CFC21_057899 PE=3 SV=1
PlainYeastBread.csv	CS_P07264	19699000000	79863000000	17976000000	3-isopropylmalate dehydratase OS=Saccharomyces cerevisiae (strain ATCC 204508 / S288c) OX=559292 GN=LEU1 PE=1 SV=3
PlainYeastBread.csv	WHT_A0A3B6JL62	19377000000	68136000000	3632000000	SMP domain-containing protein OS=Triticum aestivum OX=4565 GN=CFC21_062794 PE=3 SV=1
PlainYeastBread.csv	WHT_A0A3B6NS49	5223500000	5099900000	3799900000	STI1 domain-containing protein OS=Triticum aestivum OX=4565 GN=CFC21_083806 PE=4 SV=1
PlainYeastBread.csv	BRL_F2EJI3	24780000000	338940000000	118990000000	Histone H2A OS=Hordeum vulgare subsp. vulgare OX=112509 PE=2 SV=1
PlainYeastBread.csv	WHT_A0A3B6QCS0	24780000000	338940000000	118990000000	Histone H2A OS=Triticum aestivum OX=4565 GN=CFC21_091305 PE=3 SV=1
PlainYeastBread.csv	WHT_A0A3B6HTI0	2286200000	93080000	2358600000	VOC domain-containing protein OS=Triticum aestivum OX=4565 GN=CFC21_051786 PE=4 SV=1
PlainYeastBread.csv	CS_P40212	226680000000	235930000000	134510000000	Large ribosomal subunit protein eL13B OS=Saccharomyces cerevisiae (strain ATCC 204508 / S288c) OX=559292 GN=RPL13B PE=1 SV=1
PlainYeastBread.csv	WHT_A0A3B6I296	3240000000	255140000000	91927000000	Bifunctional inhibitor/plant lipid transfer protein/seed storage helical domain-containing protein OS=Triticum aestivum OX=4565 GN=CFC21_055370 PE=4 SV=1
PlainYeastBread.csv	CS_P16861	959400000	19577000000	20514000000	ATP-dependent 6-phosphofructokinase subunit alpha OS=Saccharomyces cerevisiae (strain ATCC 204508 / S288c) OX=559292 GN=PFK1 PE=1 SV=1
PlainYeastBread.csv	CS_P32191	16523000000	25887000000	21511000000	Glycerol-3-phosphate dehydrogenase mitochondrial OS=Saccharomyces cerevisiae (strain ATCC 204508 / S288c) OX=559292 GN=GUT2 PE=1 SV=2
PlainYeastBread.csv	WHT_A0A3B6LW98	111160000000	4537000000	23224000000	rRNA N-glycosylase OS=Triticum aestivum OX=4565 GN=CFC21_074446 PE=3 SV=1
PlainYeastBread.csv	WHT_A0A3B6JHH7	5316800000	2935000000	1123600000	Uncharacterized protein OS=Triticum aestivum OX=4565 GN=CFC21_061765 PE=4 SV=1
PlainYeastBread.csv	CS_P0CX36	1140000000	246690000000	139890000000	Small ribosomal subunit protein eS4B OS=Saccharomyces cerevisiae (strain ATCC 204508 / S288c) OX=559292 GN=RPS4B PE=1 SV=1
PlainYeastBread.csv	WHT_A0A3B6LTN4	153070000000	291160000000	137510000000	Ribosomal protein L13a OS=Triticum aestivum OX=4565 GN=CFC21_073584 PE=3 SV=1
PlainYeastBread.csv	CS_P41939	141550000000	122870000000	64347000000	Isocitrate dehydrogenase [NADP] cytoplasmic OS=Saccharomyces cerevisiae (strain ATCC 204508 / S288c) OX=559292 GN=IDP2 PE=1 SV=2
PlainYeastBread.csv	CS_P04456	137630000000	209780000000	108550000000	Large ribosomal subunit protein uL23 OS=Saccharomyces cerevisiae (strain ATCC 204508 / S288c) OX=559292 GN=RPL25 PE=1 SV=4
PlainYeastBread.csv	WHT_A0A3B6KHW7	0	36401000000	16243000000	Oil body-associated protein 1A OS=Triticum aestivum OX=4565 GN=CFC21_066139 PE=3 SV=1
PlainYeastBread.csv	WHT_A0A3B5Y1D7	23534000000	58581000000	22973000000	Serine hydroxymethyltransferase OS=Triticum aestivum OX=4565 PE=3 SV=1
PlainYeastBread.csv	WHT_A0A3B6IZS6		30917000000	5793800000	Clp R domain-containing protein OS=Triticum aestivum OX=4565 GN=CFC21_059781 PE=3 SV=1
PlainYeastBread.csv	WHT_A9U8G4	1478000000	34213000000	12241000000	Alcohol dehydrogenase ADH1A OS=Triticum aestivum OX=4565 GN=CFC21_052816 PE=2 SV=1
PlainYeastBread.csv	WHT_A0A3B6I218	78470000000	26478000000	23444000000	Acid phosphatase OS=Triticum aestivum OX=4565 GN=CFC21_055122 PE=4 SV=1
PlainYeastBread.csv	WHT_A0A3B6TBF6	121960000000	186640000000	7375000000	Large ribosomal subunit protein uL6 alpha-beta domain-containing protein OS=Triticum aestivum OX=4565 GN=CFC21_106478 PE=3 SV=1
PlainYeastBread.csv	CS_P32316	51106000000	38747000000	19442000000	Acetyl-CoA hydrolase OS=Saccharomyces cerevisiae (strain ATCC 204508 / S288c) OX=559292 GN=ACH1 PE=1 SV=2
PlainYeastBread.csv	BRL_F2CZQ3	8611500000	13664000000	7882500000	Glucose-6-phosphate isomerase OS=Hordeum vulgare subsp. vulgare OX=112509 PE=2 SV=1
PlainYeastBread.csv	WHT_A0A2X0SLI3	42908000000	474290000000	143270000000	40S ribosomal protein S6 OS=Triticum aestivum OX=4565 GN=CAMPLR22A2D_LOCUS1521 PE=3 SV=1
PlainYeastBread.csv	CS_P38077	38649000000	51911000000	25556000000	ATP synthase subunit gamma mitochondrial OS=Saccharomyces cerevisiae (strain ATCC 204508 / S288c) OX=559292 GN=ATP3 PE=1 SV=1
PlainYeastBread.csv	BRL_A0A8I6WZJ4	21303000000	60913000000	35721000000	60S ribosomal protein L3 OS=Hordeum vulgare subsp. vulgare OX=112509 PE=3 SV=1
PlainYeastBread.csv	WHT_A1YE34	21303000000	60913000000	35721000000	Ribosomal protein L3-B2 OS=Triticum aestivum OX=4565 GN=RPL3-B2 PE=2 SV=1
PlainYeastBread.csv	WHT_A0A3B6LNG6	114900000			Uncharacterized protein OS=Triticum aestivum OX=4565 GN=CFC21_071974 PE=3 SV=1
PlainYeastBread.csv	BRL_A0A8I7B162	235970000000	664130000000	538680000000	Uncharacterized protein OS=Hordeum vulgare subsp. vulgare OX=112509 PE=3 SV=1
PlainYeastBread.csv	WHT_A0A0K2QJC7	515370000000	1010300000000	503240000000	Alpha/beta-gliadin OS=Triticum aestivum OX=4565 GN=Gli-2 PE=4 SV=1
PlainYeastBread.csv	WHT_A0A3B5ZWC2	3125400000	16622000000	356600000	CRAL-TRIO domain-containing protein OS=Triticum aestivum OX=4565 GN=CFC21_012431 PE=3 SV=1
PlainYeastBread.csv	CS_P05317	259920000000	339330000000	220410000000	Large ribosomal subunit protein uL10 OS=Saccharomyces cerevisiae (strain ATCC 204508 / S288c) OX=559292 GN=RPP0 PE=1 SV=2
PlainYeastBread.csv	CS_Q01855	99371000000	265520000000	140420000000	Small ribosomal subunit protein uS19 OS=Saccharomyces cerevisiae (strain ATCC 204508 / S288c) OX=559292 GN=RPS15 PE=1 SV=1
PlainYeastBread.csv	CS_P31116	51973000000	91022000000	42224000000	Homoserine dehydrogenase OS=Saccharomyces cerevisiae (strain ATCC 204508 / S288c) OX=559292 GN=HOM6 PE=1 SV=1
PlainYeastBread.csv	CS_Q12213	120640000000	281990000000	166770000000	Large ribosomal subunit protein uL30B OS=Saccharomyces cerevisiae (strain ATCC 204508 / S288c) OX=559292 GN=RPL7B PE=1 SV=3
PlainYeastBread.csv	WHT_A0A3B6SEW6	255960000000	39110000000	220280000000	60S ribosomal protein L13 OS=Triticum aestivum OX=4565 GN=CFC21_102940 PE=3 SV=1
PlainYeastBread.csv	WHT_A0A2X0S675	3676300000	21422000000	15333000000	Genome assembly chromosome: II OS=Triticum aestivum OX=4565 GN=CAMPLR22A2D_LOCUS2816 PE=4 SV=1
PlainYeastBread.csv	WHT_A0A3B6TNG6	130110000000	128680000000	8628000000	SHSP domain-containing protein OS=Triticum aestivum OX=4565 GN=CFC21_108261 PE=3 SV=1
PlainYeastBread.csv	WHT_M9TLK0	229840000000	294970000000	349330000000	Gamma gliadin-B2 OS=Triticum aestivum OX=4565 GN=Gli-1 PE=2 SV=1
PlainYeastBread.csv	CS_P08524	36994000000	5962000000	38712000000	Farnesyl pyrophosphate synthase OS=Saccharomyces cerevisiae (strain ATCC 204508 / S288c) OX=559292 GN=ERG20 PE=1 SV=2
PlainYeastBread.csv	CS_P07281	401790000000	612920000000	315240000000	Small ribosomal subunit protein eS19B OS=Saccharomyces cerevisiae (strain ATCC 204508 / S288c) OX=559292 GN=RPS19B PE=1 SV=2
PlainYeastBread.csv	WHT_A0A3B6KQV6	25022000000	37243000000	12474000000	Succinate dehydrogenase [ubiquinone] flavoprotein subunit mitochondrial OS=Triticum aestivum OX=4565 GN=CFC21_067907 PE=3 SV=1
PlainYeastBread.csv	WHT_P04568	112910000000	185010000000	361530000000	Em protein OS=Triticum aestivum OX=4565 GN=EM PE=2 SV=1
PlainYeastBread.csv	WHT_Q94KM0	4019700000	41041000000	25498000000	HSP17 OS=Triticum aestivum OX=4565 GN=CFC21_046295 PE=2 SV=1
PlainYeastBread.csv	WHT_A0A3B6HS34	195680000000	193610000000	122480000000	Histone H2A OS=Triticum aestivum OX=4565 GN=CFC21_051805 PE=3 SV=1
PlainYeastBread.csv	WHT_A0A3B6LTU9	20373000000	29707000000	10451000000	aspartate-semialdehyde dehydrogenase OS=Triticum aestivum OX=4565 GN=CFC21_073636 PE=3 SV=1
PlainYeastBread.csv	BRL_A0A8I6XST8	20373000000	29707000000	10451000000	aspartate-semialdehyde dehydrogenase OS=Hordeum vulgare subsp. vulgare OX=112509 PE=3 SV=1
PlainYeastBread.csv	WHT_A0A3B5ZW36	31711000000	64613000000	55515000000	Uncharacterized protein OS=Triticum aestivum OX=4565 GN=CFC21_012372 PE=4 SV=1
PlainYeastBread.csv	WHT_A0A3B6NWP3	23753000000	63791000000	12432000000	3-ketoacyl-CoA thiolase OS=Triticum aestivum OX=4565 PE=3 SV=1
PlainYeastBread.csv	CS_P0CX41	128950000000	175590000000	10840000000	Large ribosomal subunit protein uL14A OS=Saccharomyces cerevisiae (strain ATCC 204508 / S288c) OX=559292 GN=RPL23A PE=1 SV=1
PlainYeastBread.csv	CS_Q03104	40051000000	35395000000	24205000000	Meiotic sister chromatid recombination protein 1 OS=Saccharomyces cerevisiae (strain ATCC 204508 / S288c) OX=559292 GN=MSC1 PE=1 SV=1
PlainYeastBread.csv	CS_P0CX45	185110000000	26950000000	124770000000	Large ribosomal subunit protein uL2A OS=Saccharomyces cerevisiae (strain ATCC 204508 / S288c) OX=559292 GN=RPL2A PE=1 SV=1
PlainYeastBread.csv	BRL_A0A8I7BFH1	99797000000	133210000000	84624000000	Serpin domain-containing protein OS=Hordeum vulgare subsp. vulgare OX=112509 PE=3 SV=1
PlainYeastBread.csv	CS_P26783	173080000000	172470000000	17210000000	Small ribosomal subunit protein uS7 OS=Saccharomyces cerevisiae (strain ATCC 204508 / S288c) OX=559292 GN=RPS5 PE=1 SV=3
PlainYeastBread.csv	WHT_A0A3B6JCF8	10494000000	16027000000	12685000000	5-methyltetrahydropteroyltriglutamate--homocysteine S-methyltransferase OS=Triticum aestivum OX=4565 GN=CFC21_060102 PE=3 SV=1
PlainYeastBread.csv	WHT_A0A3B5Y269	1597300000	7099400000	13291000000	Uncharacterized protein OS=Triticum aestivum OX=4565 PE=4 SV=1
PlainYeastBread.csv	WHT_A0A3B6NR27	40963000000	87329000000	42365000000	ornithine carbamoyltransferase OS=Triticum aestivum OX=4565 GN=CFC21_031039 PE=3 SV=1
PlainYeastBread.csv	CS_P41805	131950000000	257640000000	152040000000	Large ribosomal subunit protein uL16 OS=Saccharomyces cerevisiae (strain ATCC 204508 / S288c) OX=559292 GN=RPL10 PE=1 SV=1
PlainYeastBread.csv	BRL_A1X810	4835800000	279000000	16785000000	14-3-3E OS=Hordeum vulgare subsp. vulgare OX=112509 PE=2 SV=1
PlainYeastBread.csv	BRL_F2DQ10	14634000000	72287000000	22513000000	26S proteasome non-ATPase regulatory subunit 2 homolog OS=Hordeum vulgare subsp. vulgare OX=112509 PE=2 SV=1
PlainYeastBread.csv	WHT_A0A3B6PII1	14634000000	72287000000	22513000000	26S proteasome non-ATPase regulatory subunit 2 homolog OS=Triticum aestivum OX=4565 GN=CFC21_087321 PE=3 SV=1
PlainYeastBread.csv	WHT_I0IT56	88801000000	362690000000	281880000000	Alpha/beta-gliadin OS=Triticum aestivum OX=4565 GN=Gli-2 PE=4 SV=1
PlainYeastBread.csv	WHT_A0A3B6PHC0	88801000000	362690000000	281880000000	Bifunctional inhibitor/plant lipid transfer protein/seed storage helical domain-containing protein OS=Triticum aestivum OX=4565 GN=CFC21_086400 PE=4 SV=1
PlainYeastBread.csv	CS_Q12363	91659000000	18240000000	72109000000	Transcriptional modulator WTM1 OS=Saccharomyces cerevisiae (strain ATCC 204508 / S288c) OX=559292 GN=WTM1 PE=1 SV=1
PlainYeastBread.csv	BRL_A0A8I7BA12	42511000000	216080000000	15777000000	Cupin type-1 domain-containing protein OS=Hordeum vulgare subsp. vulgare OX=112509 PE=4 SV=1
PlainYeastBread.csv	WHT_A0A3B6TGD2	37319000000	51579000000	21308000000	Annexin OS=Triticum aestivum OX=4565 GN=CFC21_108225 PE=3 SV=1
PlainYeastBread.csv	CS_P53598	25361000000	35207000000	16062000000	Succinate--CoA ligase [ADP-forming] subunit alpha mitochondrial OS=Saccharomyces cerevisiae (strain ATCC 204508 / S288c) OX=559292 GN=LSC1 PE=1 SV=1
PlainYeastBread.csv	WHT_A0A3B6KRY4	77939000000	76458000000	67931000000	H15 domain-containing protein OS=Triticum aestivum OX=4565 GN=CFC21_068241 PE=3 SV=1
PlainYeastBread.csv	WHT_A0A3B6SAG6	295960000000	373290000000	165860000000	Aldose 1-epimerase OS=Triticum aestivum OX=4565 GN=CFC21_101618 PE=3 SV=1
PlainYeastBread.csv	CS_P54114	46437000000	56039000000	70913000000	Aldehyde dehydrogenase [NAD(P)+] 2 OS=Saccharomyces cerevisiae (strain ATCC 204508 / S288c) OX=559292 GN=ALD3 PE=1 SV=1
PlainYeastBread.csv	WHT_A0A3B6PIY7	82415000000	171190000000	106680000000	30S ribosomal protein S11 chloroplastic OS=Triticum aestivum OX=4565 GN=CFC21_087522 PE=3 SV=1
PlainYeastBread.csv	WHT_A0A3B6EH38	1916500000	7992100000	5794900000	Uncharacterized protein OS=Triticum aestivum OX=4565 GN=CFC21_035823 PE=4 SV=1
PlainYeastBread.csv	CS_P41277	84119000000	147050000000	35971000000	Glycerol-1-phosphate phosphohydrolase 1 OS=Saccharomyces cerevisiae (strain ATCC 204508 / S288c) OX=559292 GN=GPP1 PE=1 SV=3
PlainYeastBread.csv	CS_P07259	22269000000	69358000000	16758000000	Protein URA2 OS=Saccharomyces cerevisiae (strain ATCC 204508 / S288c) OX=559292 GN=URA2 PE=1 SV=5
PlainYeastBread.csv	CS_P05748	83651000000	85591000000	56019000000	Large ribosomal subunit protein eL15A OS=Saccharomyces cerevisiae (strain ATCC 204508 / S288c) OX=559292 GN=RPL15A PE=1 SV=3
PlainYeastBread.csv	CS_P17649	2134000000	45539000000	21086000000	4-aminobutyrate aminotransferase OS=Saccharomyces cerevisiae (strain ATCC 204508 / S288c) OX=559292 GN=UGA1 PE=1 SV=2
PlainYeastBread.csv	WHT_W4ZLP9	11251000000	34282000000	13482000000	RanBD1 domain-containing protein OS=Triticum aestivum OX=4565 GN=CFC21_011093 PE=4 SV=1
PlainYeastBread.csv	CS_P04173	46824000000	95236000000	48515000000	3-isopropylmalate dehydrogenase OS=Saccharomyces cerevisiae (strain ATCC 204508 / S288c) OX=559292 GN=LEU2 PE=1 SV=4
PlainYeastBread.csv	WHT_A0A3B5ZT54	0	18693000000	14193000000	Low-temperature-induced 65 kDa protein OS=Triticum aestivum OX=4565 GN=CFC21_061418 PE=4 SV=1
PlainYeastBread.csv	CS_P14306	81508000000	68371000000	44725000000	Carboxypeptidase Y inhibitor OS=Saccharomyces cerevisiae (strain ATCC 204508 / S288c) OX=559292 GN=TFS1 PE=1 SV=2
PlainYeastBread.csv	WHT_A0A3B6MVI8	249250000000	6050000000	4980000000	Knottin scorpion toxin-like domain-containing protein OS=Triticum aestivum OX=4565 GN=CFC21_078876 PE=3 SV=1
PlainYeastBread.csv	WHT_W5FHQ6	637850000000	640560000000	406020000000	Defensin OS=Triticum aestivum OX=4565 GN=PDF31 PE=2 SV=1
PlainYeastBread.csv	CS_P0CX24	105750000000	270990000000	20420000000	Large ribosomal subunit protein eL20B OS=Saccharomyces cerevisiae (strain ATCC 204508 / S288c) OX=559292 GN=RPL20B PE=1 SV=1
PlainYeastBread.csv	CS_P0CX47	296330000000	349380000000	17870000000	Small ribosomal subunit protein uS17A OS=Saccharomyces cerevisiae (strain ATCC 204508 / S288c) OX=559292 GN=RPS11A PE=1 SV=1
PlainYeastBread.csv	CS_P38701	137640000000	222570000000	98759000000	Small ribosomal subunit protein uS10 OS=Saccharomyces cerevisiae (strain ATCC 204508 / S288c) OX=559292 GN=RPS20 PE=1 SV=3
PlainYeastBread.csv	WHT_A0A3B6QCE1	13832000000	52991000000	19152000000	3-isopropylmalate dehydratase OS=Triticum aestivum OX=4565 GN=CFC21_091429 PE=4 SV=1
PlainYeastBread.csv	WHT_W5ACM8	19339000000	93693000000	23255000000	Delta-1-pyrroline-5-carboxylate synthase OS=Triticum aestivum OX=4565 GN=CFC21_012543 PE=2 SV=1
PlainYeastBread.csv	WHT_A0A0F7GA49	7325600000	18156000000	8846700000	WSI18 protein OS=Triticum aestivum OX=4565 GN=CFC21_047681 PE=2 SV=1
PlainYeastBread.csv	CS_P08679	31983000000	75112000000	31771000000	Citrate synthase peroxisomal OS=Saccharomyces cerevisiae (strain ATCC 204508 / S288c) OX=559292 GN=CIT2 PE=1 SV=1
PlainYeastBread.csv	BRL_F2CPT7	30295000000	52548000000	16627000000	Predicted protein OS=Hordeum vulgare subsp. vulgare OX=112509 PE=2 SV=1
PlainYeastBread.csv	WHT_A0A3B6KGR6	30295000000	52548000000	16627000000	Thioredoxin domain-containing protein OS=Triticum aestivum OX=4565 GN=CFC21_066090 PE=3 SV=1
PlainYeastBread.csv	CS_P39516	75407000000	160810000000	131760000000	Small ribosomal subunit protein uS11B OS=Saccharomyces cerevisiae (strain ATCC 204508 / S288c) OX=559292 GN=RPS14B PE=1 SV=2
PlainYeastBread.csv	WHT_A0A3B6KGC3	12433000000	16023000000	15567000000	E1 ubiquitin-activating enzyme OS=Triticum aestivum OX=4565 PE=3 SV=1
PlainYeastBread.csv	WHT_A0A3B6HR42	36199000000	51702000000	19899000000	Aminotransferase class I/classII domain-containing protein OS=Triticum aestivum OX=4565 PE=3 SV=1
PlainYeastBread.csv	SOY_P04776	23278000000	60332000000	2871000000	Glycinin G1 OS=Glycine max OX=3847 GN=GY1 PE=1 SV=2
PlainYeastBread.csv	WHT_A0A1D5UVY4	18104000000	7631000000	22012000000	dihydrolipoyllysine-residue succinyltransferase OS=Triticum aestivum OX=4565 GN=CAMPLR22A2D_LOCUS339 PE=3 SV=1
PlainYeastBread.csv	BRL_A0A8I6XBF6	18104000000	7631000000	22012000000	dihydrolipoyllysine-residue succinyltransferase OS=Hordeum vulgare subsp. vulgare OX=112509 PE=3 SV=1
PlainYeastBread.csv	CS_P38891	38458000000	5997000000	33677000000	Branched-chain-amino-acid aminotransferase mitochondrial OS=Saccharomyces cerevisiae (strain ATCC 204508 / S288c) OX=559292 GN=BAT1 PE=1 SV=1
PlainYeastBread.csv	WHT_W5I035	40069000000	228880000000	120590000000	Small ribosomal subunit protein uS15 N-terminal domain-containing protein OS=Triticum aestivum OX=4565 GN=CFC21_054424 PE=3 SV=1
PlainYeastBread.csv	WHT_A0A3B5Y3D7	0	3481300000	0	Uncharacterized protein OS=Triticum aestivum OX=4565 PE=4 SV=1
PlainYeastBread.csv	BRL_A0A8I7B3C6	111730000000	118590000000	51589000000	NAC-A/B domain-containing protein OS=Hordeum vulgare subsp. vulgare OX=112509 PE=4 SV=1
PlainYeastBread.csv	WHT_A0A3B5YY70	111730000000	118590000000	51589000000	NAC-A/B domain-containing protein OS=Triticum aestivum OX=4565 GN=CFC21_007193 PE=4 SV=1
PlainYeastBread.csv	WHT_P93606	375400000	19153000000	660300000	Superoxide dismutase OS=Triticum aestivum OX=4565 GN=SOD3.2 PE=2 SV=1
PlainYeastBread.csv	WHT_A0A3B5Y1S1	3148000000	90031000000	61561000000	Uncharacterized protein OS=Triticum aestivum OX=4565 PE=4 SV=1
PlainYeastBread.csv	WHT_B8YG97	138520000000	310140000000	431570000000	Avenin-like b11 OS=Triticum aestivum OX=4565 PE=3 SV=1
PlainYeastBread.csv	WHT_A0A3B6IMT6	6186400000	18398000000	2323300000	Uncharacterized protein OS=Triticum aestivum OX=4565 PE=4 SV=1
PlainYeastBread.csv	BRL_A0A8I7B6R1	6186400000	18398000000	2323300000	Coatomer subunit alpha OS=Hordeum vulgare subsp. vulgare OX=112509 PE=4 SV=1
PlainYeastBread.csv	WHT_A0A3B6C6J9	994600000	1139100000000	18745000000	Clp R domain-containing protein OS=Triticum aestivum OX=4565 GN=CFC21_023635 PE=3 SV=1
PlainYeastBread.csv	WHT_A0A3B6AZ70	994600000	1139100000000	18745000000	Clp R domain-containing protein OS=Triticum aestivum OX=4565 GN=CFC21_017232 PE=3 SV=1
PlainYeastBread.csv	CS_P0C2H6	101940000000	12840000000	79876000000	Large ribosomal subunit protein eL27A OS=Saccharomyces cerevisiae (strain ATCC 204508 / S288c) OX=559292 GN=RPL27A PE=1 SV=1
PlainYeastBread.csv	WHT_A0A1D5UH29		36624000000		alanine transaminase OS=Triticum aestivum OX=4565 GN=CAMPLR22A2D_LOCUS2587 PE=3 SV=1
PlainYeastBread.csv	WHT_A0A3B6IRI4	31749000000	40552000000	37817000000	Purple acid phosphatase OS=Triticum aestivum OX=4565 GN=CFC21_041695 PE=3 SV=1
PlainYeastBread.csv	BRL_A0A8I6XXA7	52113000000	196630000000	23119000000	Polyadenylate-binding protein OS=Hordeum vulgare subsp. vulgare OX=112509 PE=3 SV=1
PlainYeastBread.csv	WHT_A0A3B6LKB2	52113000000	196630000000	23119000000	Polyadenylate-binding protein OS=Triticum aestivum OX=4565 GN=CFC21_071132 PE=3 SV=1
PlainYeastBread.csv	CS_P00447	36562000000	46383000000	22906000000	Superoxide dismutase [Mn] mitochondrial OS=Saccharomyces cerevisiae (strain ATCC 204508 / S288c) OX=559292 GN=SOD2 PE=1 SV=1
PlainYeastBread.csv	WHT_A0A3B6JEJ1	42452000000	96995000000	34493000000	FAD/NAD(P)-binding domain-containing protein OS=Triticum aestivum OX=4565 GN=CFC21_060063 PE=4 SV=1
PlainYeastBread.csv	CS_P0CX54	247060000000	438820000000	1680000000	Large ribosomal subunit protein uL11B OS=Saccharomyces cerevisiae (strain ATCC 204508 / S288c) OX=559292 GN=RPL12B PE=1 SV=1
PlainYeastBread.csv	BRL_A0A8I6WDM4	0	726600000		alanine transaminase OS=Hordeum vulgare subsp. vulgare OX=112509 PE=3 SV=1
PlainYeastBread.csv	BRL_F2DEP3	121330000000	124660000000	43247000000	Predicted protein OS=Hordeum vulgare subsp. vulgare OX=112509 PE=2 SV=1
PlainYeastBread.csv	WHT_W5ASF3	121330000000	124660000000	43247000000	Genome assembly chromosome: II OS=Triticum aestivum OX=4565 GN=CAMPLR22A2D_LOCUS4422 PE=3 SV=1
PlainYeastBread.csv	CRAP_CASB	437970000000	296510000000	378960000000	CRAP_CASB_BOVIN
PlainYeastBread.csv	CS_Q00711	46434000000	4941000000	57186000000	Succinate dehydrogenase [ubiquinone] flavoprotein subunit mitochondrial OS=Saccharomyces cerevisiae (strain ATCC 204508 / S288c) OX=559292 GN=SDH1 PE=1 SV=1
PlainYeastBread.csv	WHT_B1GXL6	84569000000	100120000000	50189000000	Puroindoline b-like protein 2v2 OS=Triticum aestivum OX=4565 GN=pinBv2 PE=2 SV=1
PlainYeastBread.csv	BRL_F2DUJ6	3245900000	3028700000	339190000	Ubiquitin receptor RAD23 OS=Hordeum vulgare subsp. vulgare OX=112509 PE=2 SV=1
PlainYeastBread.csv	BRL_A0A8I6WW92		0	0	SHSP domain-containing protein OS=Hordeum vulgare subsp. vulgare OX=112509 PE=4 SV=1
PlainYeastBread.csv	SOY_A0A0R0J8M3	0		0	Pyruvate phosphate dikinase OS=Glycine max OX=3847 GN=GLYMA_07G253700 PE=3 SV=1
PlainYeastBread.csv	SOY_K7MJI6	0		0	Pyruvate phosphate dikinase OS=Glycine max OX=3847 GN=100786435 PE=3 SV=1
PlainYeastBread.csv	CS_P00427	25478000000	3575000000	18806000000	Cytochrome c oxidase subunit 6 mitochondrial OS=Saccharomyces cerevisiae (strain ATCC 204508 / S288c) OX=559292 GN=COX6 PE=1 SV=1
PlainYeastBread.csv	WHT_A0A3B5ZYM9	0	3975500000	2226600000	UspA domain-containing protein OS=Triticum aestivum OX=4565 GN=CFC21_012965 PE=4 SV=1
PlainYeastBread.csv	WHT_Q5I7K2	84721000000	7187000000	4069000000	40S ribosomal protein S7 OS=Triticum aestivum OX=4565 GN=CFC21_051939 PE=1 SV=1
PlainYeastBread.csv	BRL_A0A8I7B8E9	1908100000	0	0	Superoxide dismutase OS=Hordeum vulgare subsp. vulgare OX=112509 PE=3 SV=1
PlainYeastBread.csv	WHT_A0A3B6TUF5	17509000000	239000000	9350100000	Enoyl-[acyl-carrier-protein] reductase (NADH) OS=Triticum aestivum OX=4565 GN=CFC21_109999 PE=3 SV=1
PlainYeastBread.csv	BRL_A0A8I6YPI7	17509000000	239000000	9350100000	Enoyl-[acyl-carrier-protein] reductase (NADH) OS=Hordeum vulgare subsp. vulgare OX=112509 PE=3 SV=1
PlainYeastBread.csv	WHT_A0A3B6PVC1	81956000000	142360000000	69293000000	K Homology domain-containing protein OS=Triticum aestivum OX=4565 GN=CFC21_090316 PE=4 SV=1
PlainYeastBread.csv	CS_P02406	165310000000	209120000000	127430000000	Large ribosomal subunit protein uL15 OS=Saccharomyces cerevisiae (strain ATCC 204508 / S288c) OX=559292 GN=RPL28 PE=1 SV=3
PlainYeastBread.csv	CS_P15891	52481000000	55762000000	28839000000	Actin-binding protein OS=Saccharomyces cerevisiae (strain ATCC 204508 / S288c) OX=559292 GN=ABP1 PE=1 SV=4
PlainYeastBread.csv	CS_P14126	17830000000	137290000000	186020000000	Large ribosomal subunit protein uL3 OS=Saccharomyces cerevisiae (strain ATCC 204508 / S288c) OX=559292 GN=RPL3 PE=1 SV=4
PlainYeastBread.csv	WHT_A0A3B6EMX2	26013000000	31789000000	15616000000	Obg-like ATPase 1 OS=Triticum aestivum OX=4565 PE=3 SV=1
PlainYeastBread.csv	WHT_A0A3B6TIG0	115670000000	163230000000	63901000000	Glutaredoxin-dependent peroxiredoxin OS=Triticum aestivum OX=4565 GN=CFC21_110375 PE=3 SV=1
PlainYeastBread.csv	BRL_F2E9D5	443300000	6339300000	2113800000	Predicted protein OS=Hordeum vulgare subsp. vulgare OX=112509 PE=2 SV=1
PlainYeastBread.csv	CS_P33416	13487000000	106330000000	12552000000	Heat shock protein 78 mitochondrial OS=Saccharomyces cerevisiae (strain ATCC 204508 / S288c) OX=559292 GN=HSP78 PE=1 SV=2
PlainYeastBread.csv	WHT_A0A3B6RL18	179350000000	208730000000	164430000000	SMP domain-containing protein OS=Triticum aestivum OX=4565 GN=CFC21_098397 PE=3 SV=1
PlainYeastBread.csv	WHT_H6U7Y8	89512000000	141620000000	120410000000	PINB-2v1-3 OS=Triticum aestivum OX=4565 GN=CFC21_111539 PE=4 SV=1
PlainYeastBread.csv	WHT_W5DS33	304910000000	339320000000	141040000000	40S ribosomal protein S16 OS=Triticum aestivum OX=4565 GN=CFC21_052701 PE=3 SV=1
PlainYeastBread.csv	CS_P0CX39	183090000000	297820000000	141230000000	Small ribosomal subunit protein eS8A OS=Saccharomyces cerevisiae (strain ATCC 204508 / S288c) OX=559292 GN=RPS8A PE=1 SV=1
PlainYeastBread.csv	WHT_A0A3B6H3F1	19646000000	20564000000	16691000000	Dolichyl-diphosphooligosaccharide--protein glycosyltransferase subunit 2 OS=Triticum aestivum OX=4565 GN=CFC21_049324 PE=3 SV=1
PlainYeastBread.csv	CS_P22768	14799000000	24546000000	6438300000	Argininosuccinate synthase OS=Saccharomyces cerevisiae (strain ATCC 204508 / S288c) OX=559292 GN=ARG1 PE=1 SV=3
PlainYeastBread.csv	WHT_A0A3B5YZ06	19540000000	221630000000	159190000000	Peptidase M24 domain-containing protein OS=Triticum aestivum OX=4565 GN=CFC21_007068 PE=3 SV=1
PlainYeastBread.csv	WHT_A0A3B6UA79	86088000000	78404000000	45828000000	Bifunctional inhibitor/plant lipid transfer protein/seed storage helical domain-containing protein OS=Triticum aestivum OX=4565 GN=CFC21_099965 PE=3 SV=1
PlainYeastBread.csv	CS_P02309	3015000000	5193000000	31029000000	Histone H4 OS=Saccharomyces cerevisiae (strain ATCC 204508 / S288c) OX=559292 GN=HHF2 PE=1 SV=2
PlainYeastBread.csv	WHT_W5I1R7	85636000000	95336000000	85663000000	40S ribosomal protein S3 OS=Triticum aestivum OX=4565 GN=CFC21_034353 PE=3 SV=1
PlainYeastBread.csv	WHT_W5FPA7	65831000000	97413000000	64175000000	30S ribosomal protein S4 chloroplastic OS=Triticum aestivum OX=4565 GN=CFC21_011030 PE=3 SV=1
PlainYeastBread.csv	WHT_A0A3B6PCU7	1897500000	2755200000	1827100000	STI1 domain-containing protein OS=Triticum aestivum OX=4565 GN=CFC21_085744 PE=4 SV=1
PlainYeastBread.csv	CS_P38788	10289000000	58591000000	7234500000	Ribosome-associated complex subunit SSZ1 OS=Saccharomyces cerevisiae (strain ATCC 204508 / S288c) OX=559292 GN=SSZ1 PE=1 SV=2
PlainYeastBread.csv	WHT_A0A3B6PR10	85208000000	184910000000	77566000000	ADP/ATP translocase OS=Triticum aestivum OX=4565 PE=3 SV=1
PlainYeastBread.csv	CS_P34760	196280000000	159750000000	116170000000	Peroxiredoxin TSA1 OS=Saccharomyces cerevisiae (strain ATCC 204508 / S288c) OX=559292 GN=TSA1 PE=1 SV=3
PlainYeastBread.csv	CS_P43616	13994000000	21042000000	8275700000	Cys-Gly metallodipeptidase DUG1 OS=Saccharomyces cerevisiae (strain ATCC 204508 / S288c) OX=559292 GN=DUG1 PE=1 SV=1
PlainYeastBread.csv	WHT_A0A3B6DGH2	9852900000	31144000000	6323200000	Enoyl reductase (ER) domain-containing protein OS=Triticum aestivum OX=4565 GN=CFC21_029865 PE=4 SV=1
PlainYeastBread.csv	BRL_F2E724	1511400000	59691000000	12212000000	Predicted protein OS=Hordeum vulgare subsp. vulgare OX=112509 PE=2 SV=1
PlainYeastBread.csv	WHT_A0A3B6GRW0	1511400000	59691000000	12212000000	SGT1 OS=Triticum aestivum OX=4565 GN=CFC21_047432 PE=3 SV=1
PlainYeastBread.csv	SOY_P04405	6945800000	5944600000	13078000000	Glycinin G2 OS=Glycine max OX=3847 GN=GY2 PE=1 SV=2
PlainYeastBread.csv	CS_P07342	5502000000	130270000000	57339000000	Acetolactate synthase catalytic subunit mitochondrial OS=Saccharomyces cerevisiae (strain ATCC 204508 / S288c) OX=559292 GN=ILV2 PE=1 SV=1
PlainYeastBread.csv	WHT_A0A077S6B3	9725100000	9861700000	20879000000	Carbohydrate kinase PfkB domain-containing protein OS=Triticum aestivum OX=4565 GN=CFC21_043252 PE=3 SV=1
PlainYeastBread.csv	CS_P38910	11010000000	114740000000	70345000000	10 kDa heat shock protein mitochondrial OS=Saccharomyces cerevisiae (strain ATCC 204508 / S288c) OX=559292 GN=HSP10 PE=1 SV=1
PlainYeastBread.csv	WHT_A0A1D5Z340	222470000000	158540000000	9322000000	60S ribosomal protein L7a OS=Triticum aestivum OX=4565 GN=CFC21_066623 PE=3 SV=1
PlainYeastBread.csv	BRL_A0A8I6WGZ0	23846000000	49347000000	19797000000	Xylose isomerase OS=Hordeum vulgare subsp. vulgare OX=112509 PE=3 SV=1
PlainYeastBread.csv	WHT_W5C4N4	23846000000	49347000000	19797000000	Xylose isomerase OS=Triticum aestivum OX=4565 GN=CAMPLR22A2D_LOCUS1025 PE=3 SV=1
PlainYeastBread.csv	SOY_A0A0R4J4L8	17505000000	45528000000	10093000000	AAA+ ATPase domain-containing protein OS=Glycine max OX=3847 GN=100819819 PE=3 SV=1
PlainYeastBread.csv	BRL_A0A8I6X7G6	17505000000	45528000000	10093000000	AAA+ ATPase domain-containing protein OS=Hordeum vulgare subsp. vulgare OX=112509 PE=3 SV=1
PlainYeastBread.csv	WHT_A0A3B6B5U5	17505000000	45528000000	10093000000	AAA+ ATPase domain-containing protein OS=Triticum aestivum OX=4565 GN=CFC21_019128 PE=3 SV=1
PlainYeastBread.csv	BRL_M0YVB7	35558000000	112570000000	56151000000	Translation elongation factor EF1B beta/delta subunit guanine nucleotide exchange domain-containing protein OS=Hordeum vulgare subsp. vulgare OX=112509 PE=3 SV=1
PlainYeastBread.csv	WHT_A0A1D6DK86	66801000000	79974000000	59626000000	40S ribosomal protein S24 OS=Triticum aestivum OX=4565 GN=CFC21_042262 PE=3 SV=1
PlainYeastBread.csv	CS_P32599	15775000000	18783000000	8886500000	Fimbrin OS=Saccharomyces cerevisiae (strain ATCC 204508 / S288c) OX=559292 GN=SAC6 PE=1 SV=1
PlainYeastBread.csv	WHT_A0A3B6I012	4036000000	26206000000	9809900000	Bifunctional inhibitor/plant lipid transfer protein/seed storage helical domain-containing protein OS=Triticum aestivum OX=4565 PE=3 SV=1
PlainYeastBread.csv	WHT_A0A3B6C1V4	3856500000	32683000000	9332900000	oxoglutarate dehydrogenase (succinyl-transferring) OS=Triticum aestivum OX=4565 GN=CFC21_021450 PE=3 SV=1
PlainYeastBread.csv	WHT_A0A3B6TFU9	23456000000	3054000000	7381300000	Aldose 1-epimerase OS=Triticum aestivum OX=4565 GN=CFC21_108038 PE=3 SV=1
PlainYeastBread.csv	CS_P39708	397500000	2383400000	11506000000	NADP-specific glutamate dehydrogenase 2 OS=Saccharomyces cerevisiae (strain ATCC 204508 / S288c) OX=559292 GN=GDH3 PE=3 SV=1
PlainYeastBread.csv	CS_P31373	915800000	48951000000	615600000	Cystathionine gamma-lyase OS=Saccharomyces cerevisiae (strain ATCC 204508 / S288c) OX=559292 GN=CYS3 PE=1 SV=2
PlainYeastBread.csv	WHT_A0A3B6SH91	3832500000	21981000000	4226800000	Aldehyde dehydrogenase domain-containing protein OS=Triticum aestivum OX=4565 GN=CFC21_102154 PE=3 SV=1
PlainYeastBread.csv	CS_Q04432	42221000000	106160000000	51037000000	Glutathione-independent glyoxalase HSP31 OS=Saccharomyces cerevisiae (strain ATCC 204508 / S288c) OX=559292 GN=HSP31 PE=1 SV=1
PlainYeastBread.csv	CS_Q01560	1373000000	23118000000	4539400000	Serine/arginine (SR)-type shuttling mRNA binding protein NPL3 OS=Saccharomyces cerevisiae (strain ATCC 204508 / S288c) OX=559292 GN=NPL3 PE=1 SV=1
PlainYeastBread.csv	WHT_A0A3B6TJ13	7519800000	24974000000	9033200000	glycine--tRNA ligase OS=Triticum aestivum OX=4565 GN=CFC21_109079 PE=3 SV=1
PlainYeastBread.csv	WHT_A0A3B6TNH6	7897700000	12734000000	4451500000	NADP-dependent oxidoreductase domain-containing protein OS=Triticum aestivum OX=4565 GN=CFC21_108272 PE=4 SV=1
PlainYeastBread.csv	WHT_A0A3B6TJK6	48628000000	146820000000	90239000000	Small ribosomal subunit protein uS10 domain-containing protein OS=Triticum aestivum OX=4565 GN=CFC21_107037 PE=3 SV=1
PlainYeastBread.csv	CS_P0CX84	56271000000	121190000000	59511000000	Large ribosomal subunit protein uL29A OS=Saccharomyces cerevisiae (strain ATCC 204508 / S288c) OX=559292 GN=RPL35A PE=1 SV=1
PlainYeastBread.csv	WHT_A0A3B6ATQ1	57187000000	54829000000	33839000000	Large ribosomal subunit protein uL15/eL18 domain-containing protein OS=Triticum aestivum OX=4565 GN=CFC21_015448 PE=3 SV=1
PlainYeastBread.csv	BRL_A0A8I6WZC4	21345000000	79103000000	48174000000	SHSP domain-containing protein OS=Hordeum vulgare subsp. vulgare OX=112509 PE=3 SV=1
PlainYeastBread.csv	WHT_A0A3B6MZC2	87173000000	53363000000	56195000000	H15 domain-containing protein OS=Triticum aestivum OX=4565 GN=CFC21_080090 PE=3 SV=1
PlainYeastBread.csv	CS_P34227	69978000000	108640000000	63488000000	Peroxiredoxin PRX1 mitochondrial OS=Saccharomyces cerevisiae (strain ATCC 204508 / S288c) OX=559292 GN=PRX1 PE=1 SV=1
PlainYeastBread.csv	WHT_A0A3B6H417	36426000000	56101000000	32994000000	Cytochrome b5 heme-binding domain-containing protein OS=Triticum aestivum OX=4565 GN=CFC21_050624 PE=3 SV=1
PlainYeastBread.csv	CS_P46672	24427000000	28827000000	10956000000	tRNA-aminoacylation cofactor ARC1 OS=Saccharomyces cerevisiae (strain ATCC 204508 / S288c) OX=559292 GN=ARC1 PE=1 SV=2
PlainYeastBread.csv	WHT_A0A3B6N0S4	2797000000	34952000000	18902000000	Prohibitin OS=Triticum aestivum OX=4565 GN=CFC21_080874 PE=3 SV=1
PlainYeastBread.csv	WHT_A0A3B6I0X9	2797000000	34952000000	18902000000	Prohibitin OS=Triticum aestivum OX=4565 GN=CFC21_054223 PE=3 SV=1
PlainYeastBread.csv	WHT_A0A3B6MT67	33469000000	37401000000	0	SHSP domain-containing protein OS=Triticum aestivum OX=4565 GN=CFC21_078123 PE=3 SV=1
PlainYeastBread.csv	BRL_A0A8I6WGX0	66058000000	175920000000	29214000000	Uncharacterized protein OS=Hordeum vulgare subsp. vulgare OX=112509 PE=3 SV=1
PlainYeastBread.csv	WHT_W5BEP1	4133200000	1922000000	30617000000	ATP synthase subunit d mitochondrial OS=Triticum aestivum OX=4565 GN=CAMPLR22A2D_LOCUS2925 PE=3 SV=1
PlainYeastBread.csv	CS_P15703	90815000000	146140000000	4471000000	Glucan 1 3-beta-glucosidase OS=Saccharomyces cerevisiae (strain ATCC 204508 / S288c) OX=559292 GN=BGL2 PE=1 SV=1
PlainYeastBread.csv	BRL_F2EG53	5739200000		3351900000	Predicted protein OS=Hordeum vulgare subsp. vulgare OX=112509 PE=2 SV=1
PlainYeastBread.csv	CS_Q00055	339480000000	479460000000	277730000000	Glycerol-3-phosphate dehydrogenase [NAD(+)] 1 OS=Saccharomyces cerevisiae (strain ATCC 204508 / S288c) OX=559292 GN=GPD1 PE=1 SV=4
PlainYeastBread.csv	CS_P27616	23243000000	29351000000	16283000000	Phosphoribosylaminoimidazole-succinocarboxamide synthase OS=Saccharomyces cerevisiae (strain ATCC 204508 / S288c) OX=559292 GN=ADE1 PE=1 SV=2
PlainYeastBread.csv	CS_P46655	31132000000	8656000000	45961000000	Glutamate--tRNA ligase cytoplasmic OS=Saccharomyces cerevisiae (strain ATCC 204508 / S288c) OX=559292 GN=GUS1 PE=1 SV=3
PlainYeastBread.csv	WHT_A0A3B6CB61	84659000000	109140000000	61272000000	Glutathione peroxidase OS=Triticum aestivum OX=4565 GN=CFC21_024898 PE=3 SV=1
PlainYeastBread.csv	WHT_Q43691	125860000000	100270000000		Trypsin/alpha-amylase inhibitor CMX2 OS=Triticum aestivum OX=4565 PE=2 SV=1
PlainYeastBread.csv	BRL_A0A8I6YEZ5	81279000000	16010000000	31376000000	NTF2 domain-containing protein OS=Hordeum vulgare subsp. vulgare OX=112509 PE=4 SV=1
PlainYeastBread.csv	CS_P32471	272720000000	787660000000	234610000000	Elongation factor 1-beta OS=Saccharomyces cerevisiae (strain ATCC 204508 / S288c) OX=559292 GN=EFB1 PE=1 SV=4
PlainYeastBread.csv	WHT_A0A3B6TJT9	488100000	22101000000	10486000000	Uncharacterized protein OS=Triticum aestivum OX=4565 GN=CFC21_109270 PE=3 SV=1
PlainYeastBread.csv	WHT_A0A3B6INC2	272460000000	332740000000	275950000000	TCTP domain-containing protein OS=Triticum aestivum OX=4565 PE=3 SV=1
PlainYeastBread.csv	WHT_A0A3B6GLN8	178770000000	345370000000	134030000000	Small ribosomal subunit protein uS7c OS=Triticum aestivum OX=4565 GN=CFC21_045993 PE=3 SV=1
PlainYeastBread.csv	CS_P13663	34934000000	65247000000	33884000000	Aspartate-semialdehyde dehydrogenase OS=Saccharomyces cerevisiae (strain ATCC 204508 / S288c) OX=559292 GN=HOM2 PE=1 SV=1
PlainYeastBread.csv	CS_Q12443	115010000000	8505000000	42412000000	Reticulon-like protein 2 OS=Saccharomyces cerevisiae (strain ATCC 204508 / S288c) OX=559292 GN=RTN2 PE=1 SV=1
PlainYeastBread.csv	CS_Q3E757	86461000000	192830000000	103620000000	Large ribosomal subunit protein uL5B OS=Saccharomyces cerevisiae (strain ATCC 204508 / S288c) OX=559292 GN=RPL11B PE=1 SV=3
PlainYeastBread.csv	CS_P07284	28385000000	46759000000	22298000000	Serine--tRNA ligase cytoplasmic OS=Saccharomyces cerevisiae (strain ATCC 204508 / S288c) OX=559292 GN=SES1 PE=1 SV=2
PlainYeastBread.csv	WHT_A0A3B6MQG8	236010000000	297810000000	243650000000	Non-specific lipid-transfer protein OS=Triticum aestivum OX=4565 GN=CFC21_076899 PE=3 SV=1
PlainYeastBread.csv	BRL_A0A8I6XX88	4090600000	11695000000	5586900000	RuBisCO large subunit-binding protein subunit beta chloroplastic OS=Hordeum vulgare subsp. vulgare OX=112509 PE=3 SV=1
PlainYeastBread.csv	WHT_A0A3B6PD06	4090600000	11695000000	5586900000	RuBisCO large subunit-binding protein subunit beta chloroplastic OS=Triticum aestivum OX=4565 GN=CFC21_085819 PE=3 SV=1
PlainYeastBread.csv	WHT_A0A3B6QJ23	46351000000	114460000000	44248000000	SHSP domain-containing protein OS=Triticum aestivum OX=4565 GN=CFC21_094045 PE=3 SV=1
PlainYeastBread.csv	WHT_A0A3B6C6G8	21023000000	73435000000	28679000000	HMA domain-containing protein OS=Triticum aestivum OX=4565 GN=CFC21_023608 PE=3 SV=1
PlainYeastBread.csv	BRL_F2DQL9	3123900000	13372000000	2825300000	Sulfurtransferase OS=Hordeum vulgare subsp. vulgare OX=112509 PE=2 SV=1
PlainYeastBread.csv	WHT_A0A3B6LGV0	3123900000	13372000000	2825300000	Sulfurtransferase OS=Triticum aestivum OX=4565 GN=CFC21_070116 PE=4 SV=1
PlainYeastBread.csv	WHT_P04722	412640000000	497280000000	504280000000	Alpha/beta-gliadin A-II OS=Triticum aestivum OX=4565 PE=2 SV=1
PlainYeastBread.csv	WHT_A0A3B5ZQY1	76900000	11019000000	4315700000	Importin subunit alpha OS=Triticum aestivum OX=4565 GN=CFC21_010733 PE=3 SV=1
PlainYeastBread.csv	WHT_A0A3B6LLH7	894590000000	1248300000000	708560000000	Oleosin OS=Triticum aestivum OX=4565 GN=CFC21_071342 PE=3 SV=1
PlainYeastBread.csv	CS_P05626	47435000000	67417000000	40626000000	ATP synthase subunit 4 mitochondrial OS=Saccharomyces cerevisiae (strain ATCC 204508 / S288c) OX=559292 GN=ATP4 PE=1 SV=2
PlainYeastBread.csv	BRL_A0A8I6YP10	15993000000	61118000000	20125000000	T-complex protein 1 subunit gamma OS=Hordeum vulgare subsp. vulgare OX=112509 PE=3 SV=1
PlainYeastBread.csv	WHT_A0A3B6SGU1	15993000000	61118000000	20125000000	T-complex protein 1 subunit gamma OS=Triticum aestivum OX=4565 GN=CFC21_103491 PE=3 SV=1
PlainYeastBread.csv	WHT_A0A3B6LV22	75238000000	49896000000	34509000000	H15 domain-containing protein OS=Triticum aestivum OX=4565 GN=CFC21_074065 PE=3 SV=1
PlainYeastBread.csv	CS_Q02207	25324000000	57247000000	29441000000	Peroxisomal hydratase-dehydrogenase-epimerase OS=Saccharomyces cerevisiae (strain ATCC 204508 / S288c) OX=559292 GN=FOX2 PE=2 SV=1
PlainYeastBread.csv	CS_P38879	59747000000	87576000000	45417000000	Nascent polypeptide-associated complex subunit alpha OS=Saccharomyces cerevisiae (strain ATCC 204508 / S288c) OX=559292 GN=EGD2 PE=1 SV=3
PlainYeastBread.csv	WHT_W5C8P4	16659000000	38186000000	20461000000	Genome assembly chromosome: II OS=Triticum aestivum OX=4565 GN=CAMPLR22A2D_LOCUS1442 PE=3 SV=1
PlainYeastBread.csv	BRL_F2CRB3	24308000000	1142000000	16582000000	Predicted protein OS=Hordeum vulgare subsp. vulgare OX=112509 PE=2 SV=1
PlainYeastBread.csv	WHT_A0A1D5W7M8	24308000000	1142000000	16582000000	Uncharacterized protein OS=Triticum aestivum OX=4565 GN=CFC21_041242 PE=4 SV=1
PlainYeastBread.csv	CS_P16474	4026900000	937800000	5304600000	Endoplasmic reticulum chaperone BiP OS=Saccharomyces cerevisiae (strain ATCC 204508 / S288c) OX=559292 GN=KAR2 PE=1 SV=1
PlainYeastBread.csv	CS_P19262	58233000000	9309000000	44452000000	Dihydrolipoyllysine-residue succinyltransferase component of 2-oxoglutarate dehydrogenase complex mitochondrial OS=Saccharomyces cerevisiae (strain ATCC 204508 / S288c) OX=559292 GN=KGD2 PE=1 SV=2
PlainYeastBread.csv	CS_P32836	1558400000	4096400000	7773400000	GTP-binding nuclear protein GSP2/CNR2 OS=Saccharomyces cerevisiae (strain ATCC 204508 / S288c) OX=559292 GN=GSP2 PE=1 SV=1
PlainYeastBread.csv	WHT_A0A3B6QJV8	15402000000	32894000000	10903000000	Peptidase M20 dimerisation domain-containing protein OS=Triticum aestivum OX=4565 GN=CFC21_093316 PE=4 SV=1
PlainYeastBread.csv	BRL_A0A8I6Y3K2	15402000000	32894000000	10903000000	Peptidase M20 dimerisation domain-containing protein OS=Hordeum vulgare subsp. vulgare OX=112509 PE=4 SV=1
PlainYeastBread.csv	SOY_I1L934	245670000000	26466000000	8822300000	Histone H4 OS=Glycine max OX=3847 GN=100793507 PE=3 SV=1
PlainYeastBread.csv	WHT_A0A3B6EDK9	5576500000	27375000000	10493000000	PB1 domain-containing protein OS=Triticum aestivum OX=4565 GN=CFC21_033745 PE=4 SV=1
PlainYeastBread.csv	WHT_W5BUF4	263420000000	405020000000	231070000000	Caleosin OS=Triticum aestivum OX=4565 GN=Clo1 PE=2 SV=1
PlainYeastBread.csv	CS_P0CX31	200990000000	214060000000	142860000000	Small ribosomal subunit protein eS24A OS=Saccharomyces cerevisiae (strain ATCC 204508 / S288c) OX=559292 GN=RPS24A PE=1 SV=1
PlainYeastBread.csv	BRL_A0A8I6XLI2	222620000000	696210000000	493190000000	Oleosin OS=Hordeum vulgare subsp. vulgare OX=112509 PE=3 SV=1
PlainYeastBread.csv	BRL_F2DDP7	22534000000	5439000000	25824000000	transaldolase OS=Hordeum vulgare subsp. vulgare OX=112509 PE=2 SV=1
PlainYeastBread.csv	WHT_A0A3B6GXD3	140460000000	308770000000	320140000000	Uncharacterized protein OS=Triticum aestivum OX=4565 GN=CFC21_047533 PE=4 SV=1
PlainYeastBread.csv	CS_P38999	34297000000	55978000000	32606000000	Saccharopine dehydrogenase [NADP(+) L-glutamate-forming] OS=Saccharomyces cerevisiae (strain ATCC 204508 / S288c) OX=559292 GN=LYS9 PE=1 SV=1
PlainYeastBread.csv	WHT_A0A3B5Y2C2	2490500000	64728000000	34136000000	argininosuccinate synthase OS=Triticum aestivum OX=4565 PE=3 SV=1
PlainYeastBread.csv	CS_P35719	55222000000	85137000000	58042000000	Uncharacterized protein MRP8 OS=Saccharomyces cerevisiae (strain ATCC 204508 / S288c) OX=559292 GN=MRP8 PE=1 SV=1
PlainYeastBread.csv	WHT_A0A3B6C7T5	14653000000	0	12342000000	SHSP domain-containing protein OS=Triticum aestivum OX=4565 GN=CFC21_023885 PE=3 SV=1
PlainYeastBread.csv	WHT_A0A3B6JNG4	20933000000	6389000000	27296000000	Mitochondrial processing peptidase beta subunit OS=Triticum aestivum OX=4565 PE=3 SV=1
PlainYeastBread.csv	CS_P38707	10202000000	22305000000	5341900000	Asparagine--tRNA ligase cytoplasmic OS=Saccharomyces cerevisiae (strain ATCC 204508 / S288c) OX=559292 GN=DED81 PE=1 SV=1
PlainYeastBread.csv	BRL_M0WE81	8213100000	29273000000	6628300000	Uncharacterized protein OS=Hordeum vulgare subsp. vulgare OX=112509 PE=4 SV=1
PlainYeastBread.csv	CS_P30902	44541000000	41341000000	35463000000	ATP synthase subunit d mitochondrial OS=Saccharomyces cerevisiae (strain ATCC 204508 / S288c) OX=559292 GN=ATP7 PE=1 SV=2
PlainYeastBread.csv	BRL_A0A8I6YFW7	7841700000	15106000000	3688200000	Enoyl-[acyl-carrier-protein] reductase (NADH) OS=Hordeum vulgare subsp. vulgare OX=112509 PE=3 SV=1
PlainYeastBread.csv	WHT_A0A3B6RKF9	6213200000	13529000000	5205800000	MI domain-containing protein OS=Triticum aestivum OX=4565 PE=3 SV=1
PlainYeastBread.csv	CS_P04807	30759000000	32876000000	17526000000	Hexokinase-2 OS=Saccharomyces cerevisiae (strain ATCC 204508 / S288c) OX=559292 GN=HXK2 PE=1 SV=4
PlainYeastBread.csv	CS_P38115	34004000000	4072000000	25139000000	D-arabinose dehydrogenase [NAD(P)+] heavy chain OS=Saccharomyces cerevisiae (strain ATCC 204508 / S288c) OX=559292 GN=ARA1 PE=1 SV=1
PlainYeastBread.csv	WHT_W5F826	21296000000	2617000000	18102000000	Proteasome subunit beta OS=Triticum aestivum OX=4565 GN=CFC21_072418 PE=3 SV=1
PlainYeastBread.csv	BRL_A0A8I7B9G1	21296000000	2617000000	18102000000	Proteasome subunit beta OS=Hordeum vulgare subsp. vulgare OX=112509 PE=3 SV=1
PlainYeastBread.csv	WHT_A0A3B6QIP5	25343000000	37994000000	17885000000	UspA domain-containing protein OS=Triticum aestivum OX=4565 GN=CFC21_093856 PE=4 SV=1
PlainYeastBread.csv	WHT_W5BFB7	115070000000	243120000000	97123000000	Small ribosomal subunit protein uS17 N-terminal domain-containing protein OS=Triticum aestivum OX=4565 GN=CFC21_025034 PE=3 SV=1
PlainYeastBread.csv	BRL_F2CRL2	13103000000	418900000	9724100000	UDP-glucuronate decarboxylase OS=Hordeum vulgare subsp. vulgare OX=112509 PE=2 SV=1
PlainYeastBread.csv	WHT_A0A3B6DAM6	13103000000	418900000	9724100000	UDP-glucuronate decarboxylase OS=Triticum aestivum OX=4565 GN=CFC21_028137 PE=3 SV=1
PlainYeastBread.csv	CS_P32589	72056000000	63753000000	25664000000	Heat shock protein homolog SSE1 OS=Saccharomyces cerevisiae (strain ATCC 204508 / S288c) OX=559292 GN=SSE1 PE=1 SV=4
PlainYeastBread.csv	BRL_A0A8I6WY15	6228900000		0	Acidic protein OS=Hordeum vulgare subsp. vulgare OX=112509 PE=3 SV=1
PlainYeastBread.csv	WHT_A0A3B6BXY7		14071000000	0	TATA-binding protein interacting (TIP20) domain-containing protein OS=Triticum aestivum OX=4565 GN=CFC21_021001 PE=3 SV=1
PlainYeastBread.csv	CS_P35691	38465000000	106320000000	46424000000	Translationally-controlled tumor protein homolog OS=Saccharomyces cerevisiae (strain ATCC 204508 / S288c) OX=559292 GN=TMA19 PE=1 SV=1
PlainYeastBread.csv	CS_O14455	205760000000	24110000000	144290000000	Large ribosomal subunit protein eL36B OS=Saccharomyces cerevisiae (strain ATCC 204508 / S288c) OX=559292 GN=RPL36B PE=1 SV=3
PlainYeastBread.csv	CS_P06634	4243500000	18898000000	11211000000	ATP-dependent RNA helicase DED1 OS=Saccharomyces cerevisiae (strain ATCC 204508 / S288c) OX=559292 GN=DED1 PE=1 SV=2
PlainYeastBread.csv	WHT_D7NXU0	16174000000	29091000000	11918000000	Zinc finger protein OS=Triticum aestivum OX=4565 GN=ZFN1 PE=4 SV=1
PlainYeastBread.csv	WHT_A0A3B6GQI2	61243000000	132960000000	1673200000	KOW domain-containing protein OS=Triticum aestivum OX=4565 GN=CFC21_046528 PE=3 SV=1
PlainYeastBread.csv	BRL_A0A8I6WDG9	54102000000	69103000000	5364200000	Bifunctional inhibitor/plant lipid transfer protein/seed storage helical domain-containing protein OS=Hordeum vulgare subsp. vulgare OX=112509 PE=4 SV=1
PlainYeastBread.csv	CS_Q04869	25827000000	102660000000	79338000000	Uncharacterized protein YMR315W OS=Saccharomyces cerevisiae (strain ATCC 204508 / S288c) OX=559292 GN=YMR315W PE=1 SV=1
PlainYeastBread.csv	WHT_A0A060AJU4	148250000000	6629000000	60594000000	Defensin OS=Triticum aestivum OX=4565 GN=PDF22 PE=2 SV=1
PlainYeastBread.csv	WHT_A0A3B6LWE1	77742000000	222870000000	118550000000	40S ribosomal protein S26 OS=Triticum aestivum OX=4565 GN=CFC21_074379 PE=3 SV=1
PlainYeastBread.csv	CS_P46990	254320000000	347640000000	171290000000	Large ribosomal subunit protein uL22B OS=Saccharomyces cerevisiae (strain ATCC 204508 / S288c) OX=559292 GN=RPL17B PE=1 SV=2
PlainYeastBread.csv	WHT_A0A3B6JGH7	188490000000	175230000000	155620000000	Dehydrin OS=Triticum aestivum OX=4565 GN=CFC21_060618 PE=3 SV=1
PlainYeastBread.csv	CS_Q07478	7523100000	6192600000	2352700000	ATP-dependent RNA helicase SUB2 OS=Saccharomyces cerevisiae (strain ATCC 204508 / S288c) OX=559292 GN=SUB2 PE=1 SV=1
PlainYeastBread.csv	CS_P53839	43115000000	58191000000	30331000000	Glyoxylate reductase 1 OS=Saccharomyces cerevisiae (strain ATCC 204508 / S288c) OX=559292 GN=GOR1 PE=1 SV=1
PlainYeastBread.csv	WHT_A0A3B6JCA3	19613000000	0	0	Cysteine proteinase inhibitor OS=Triticum aestivum OX=4565 GN=CFC21_060218 PE=3 SV=1
PlainYeastBread.csv	WHT_A0A3B5ZMV0	10336000000	20282000000	10742000000	Chymotrypsin inhibitor-2 OS=Triticum aestivum OX=4565 GN=CFC21_009914 PE=3 SV=1
PlainYeastBread.csv	WHT_A0A3B6JF64	17101000000	26299000000	7926200000	Non-specific lipid-transfer protein OS=Triticum aestivum OX=4565 GN=CFC21_061153 PE=3 SV=1
PlainYeastBread.csv	WHT_A0A3B6SRR2	10832000000	21784000000	11263000000	V-type proton ATPase catalytic subunit A OS=Triticum aestivum OX=4565 PE=3 SV=1
PlainYeastBread.csv	CS_P0CX49	72427000000	99905000000	43796000000	Large ribosomal subunit protein eL18A OS=Saccharomyces cerevisiae (strain ATCC 204508 / S288c) OX=559292 GN=RPL18A PE=1 SV=1
PlainYeastBread.csv	WHT_A0A3B6RG01	2815000000	41471000000	22016000000	CS domain-containing protein OS=Triticum aestivum OX=4565 GN=CFC21_096908 PE=4 SV=1
PlainYeastBread.csv	BRL_A0A8I6XTR1	13236000000	6650900000	13879000000	Vacuolar proton pump subunit B OS=Hordeum vulgare subsp. vulgare OX=112509 PE=3 SV=1
PlainYeastBread.csv	WHT_W5H1G1	13236000000	6650900000	13879000000	Vacuolar proton pump subunit B OS=Triticum aestivum OX=4565 GN=CFC21_088051 PE=3 SV=1
PlainYeastBread.csv	WHT_A0A3B6FRR6	13236000000	6650900000	13879000000	Vacuolar proton pump subunit B OS=Triticum aestivum OX=4565 GN=CFC21_041750 PE=3 SV=1
PlainYeastBread.csv	CS_Q12335	17013000000	73164000000	5153400000	Protoplast secreted protein 2 OS=Saccharomyces cerevisiae (strain ATCC 204508 / S288c) OX=559292 GN=PST2 PE=1 SV=1
PlainYeastBread.csv	WHT_I0IT65	2002700000	9886900000	1394400000	Alpha-gliadin OS=Triticum aestivum OX=4565 GN=gli-2 PE=4 SV=1
PlainYeastBread.csv	WHT_A0A3B6AZG4	7802500000	26154000000	10942000000	oxoglutarate dehydrogenase (succinyl-transferring) OS=Triticum aestivum OX=4565 GN=CFC21_017203 PE=3 SV=1
PlainYeastBread.csv	WHT_A0A3B6IQX6	2615600000	44005000000	23655000000	SHSP domain-containing protein OS=Triticum aestivum OX=4565 GN=CFC21_058101 PE=3 SV=1
PlainYeastBread.csv	WHT_A0A3B5Y2W1	3406000000	153210000000	104520000000	Uncharacterized protein OS=Triticum aestivum OX=4565 PE=4 SV=1
PlainYeastBread.csv	WHT_A0A3B6HYA0	10873000000	23829000000	9460800000	NADH dehydrogenase [ubiquinone] iron-sulfur protein 1 mitochondrial OS=Triticum aestivum OX=4565 PE=3 SV=1
PlainYeastBread.csv	CS_P05756	91475000000	137580000000	95859000000	Small ribosomal subunit protein uS15 OS=Saccharomyces cerevisiae (strain ATCC 204508 / S288c) OX=559292 GN=RPS13 PE=1 SV=3
PlainYeastBread.csv	WHT_Q5I7L3	27433000000	9613000000	26181000000	Ribosomal protein OS=Triticum aestivum OX=4565 GN=CFC21_097817 PE=1 SV=1
PlainYeastBread.csv	BRL_F2E390	27433000000	9613000000	26181000000	Ribosomal protein OS=Hordeum vulgare subsp. vulgare OX=112509 PE=2 SV=1
PlainYeastBread.csv	WHT_A0A3B6TJ74	19719000000	10346000000	10037000000	Acid phosphatase OS=Triticum aestivum OX=4565 GN=CFC21_106900 PE=4 SV=1
PlainYeastBread.csv	WHT_W5HTZ1	31182000000	70453000000	27448000000	Uncharacterized protein OS=Triticum aestivum OX=4565 GN=CFC21_102597 PE=3 SV=1
PlainYeastBread.csv	CS_Q3E7Y3	53152000000	163290000000	45084000000	Small ribosomal subunit protein uS8B OS=Saccharomyces cerevisiae (strain ATCC 204508 / S288c) OX=559292 GN=RPS22B PE=1 SV=3
PlainYeastBread.csv	CS_P04037	77294000000	101530000000	70508000000	Cytochrome c oxidase subunit 4 mitochondrial OS=Saccharomyces cerevisiae (strain ATCC 204508 / S288c) OX=559292 GN=COX4 PE=1 SV=1
PlainYeastBread.csv	WHT_A0A3B6FPZ0	21088000000	22747000000	21763000000	Proteasome subunit alpha type OS=Triticum aestivum OX=4565 GN=CFC21_042134 PE=3 SV=1
PlainYeastBread.csv	BRL_A0A287HPN8	21088000000	22747000000	21763000000	Proteasome subunit alpha type OS=Hordeum vulgare subsp. vulgare OX=112509 PE=3 SV=1
PlainYeastBread.csv	WHT_A0A3B6QGX5	0	2615400000	4252300000	60S ribosomal protein L6 OS=Triticum aestivum OX=4565 GN=CFC21_092553 PE=3 SV=1
PlainYeastBread.csv	WHT_A0A3B6MZJ5	28004000000	33212000000	13394000000	Lysine--tRNA ligase OS=Triticum aestivum OX=4565 GN=CFC21_080072 PE=3 SV=1
PlainYeastBread.csv	WHT_A0A3B6LV87	28004000000	33212000000	13394000000	Lysine--tRNA ligase OS=Triticum aestivum OX=4565 GN=CFC21_074032 PE=3 SV=1
PlainYeastBread.csv	WHT_A0A3B6DCS5	95663000000	113540000000	79726000000	Large ribosomal subunit protein uL15/eL18 domain-containing protein OS=Triticum aestivum OX=4565 GN=CFC21_028780 PE=3 SV=1
PlainYeastBread.csv	WHT_I0IT63	5660700000	2293700000	0	Alpha/beta-gliadin OS=Triticum aestivum OX=4565 GN=Gli-2 PE=4 SV=1
PlainYeastBread.csv	CS_P10080	42097000000	41183000000	14654000000	Single-stranded nucleic acid-binding protein OS=Saccharomyces cerevisiae (strain ATCC 204508 / S288c) OX=559292 GN=SBP1 PE=1 SV=2
PlainYeastBread.csv	WHT_A0A3B6RP85	14112000000	2155000000	0	Catalase core domain-containing protein OS=Triticum aestivum OX=4565 GN=CFC21_100695 PE=4 SV=1
PlainYeastBread.csv	WHT_A0A3B6EDE3	0	8217200000	4338300000	Bowman-Birk serine protease inhibitors family domain-containing protein OS=Triticum aestivum OX=4565 GN=CFC21_033691 PE=3 SV=1
PlainYeastBread.csv	WHT_A0A3B5ZZP1	733700000	13464000000	7276300000	malate dehydrogenase OS=Triticum aestivum OX=4565 GN=CFC21_013261 PE=3 SV=1
PlainYeastBread.csv	WHT_A0A3B6TNQ3	733700000	13464000000	7276300000	malate dehydrogenase OS=Triticum aestivum OX=4565 PE=3 SV=1
PlainYeastBread.csv	BRL_M0Z6C2	733700000	13464000000	7276300000	malate dehydrogenase OS=Hordeum vulgare subsp. vulgare OX=112509 PE=3 SV=1
PlainYeastBread.csv	BRL_A0A8I6YEP1	733700000	13464000000	7276300000	malate dehydrogenase OS=Hordeum vulgare subsp. vulgare OX=112509 PE=3 SV=1
PlainYeastBread.csv	WHT_A0A3B6LWL0	23702000000	407700000	15615000000	NAD(P)-binding domain-containing protein OS=Triticum aestivum OX=4565 GN=CFC21_074515 PE=4 SV=1
PlainYeastBread.csv	WHT_A0A3B6GQ54	34724000000	49924000000	19575000000	Heme-binding protein 2 OS=Triticum aestivum OX=4565 GN=CFC21_046612 PE=3 SV=1
PlainYeastBread.csv	WHT_W5C2S2	26973000000	47858000000	17309000000	Genome assembly chromosome: II OS=Triticum aestivum OX=4565 GN=CAMPLR22A2D_LOCUS2032 PE=4 SV=1
PlainYeastBread.csv	WHT_A0A3B5Y5J8	3749000000	51383000000	2937000000	Guanine nucleotide-binding protein subunit beta-like protein A OS=Triticum aestivum OX=4565 PE=3 SV=1
PlainYeastBread.csv	CS_P09624	15927000000	62691000000	13568000000	Dihydrolipoyl dehydrogenase mitochondrial OS=Saccharomyces cerevisiae (strain ATCC 204508 / S288c) OX=559292 GN=LPD1 PE=1 SV=1
PlainYeastBread.csv	WHT_A0A3B6HXP8	76251000000	139510000000	45653000000	Zeamatin-like protein OS=Triticum aestivum OX=4565 GN=CFC21_053723 PE=4 SV=1
PlainYeastBread.csv	CS_Q00764	39272000000	41363000000	31053000000	Alpha alpha-trehalose-phosphate synthase [UDP-forming] 56 kDa subunit OS=Saccharomyces cerevisiae (strain ATCC 204508 / S288c) OX=559292 GN=TPS1 PE=1 SV=2
PlainYeastBread.csv	WHT_A0A3B6IV90	1679300000	62587000000	30484000000	CN hydrolase domain-containing protein OS=Triticum aestivum OX=4565 GN=CFC21_058875 PE=4 SV=1
PlainYeastBread.csv	CS_P36105	128980000000	122180000000	86704000000	Large ribosomal subunit protein eL14A OS=Saccharomyces cerevisiae (strain ATCC 204508 / S288c) OX=559292 GN=RPL14A PE=1 SV=1
PlainYeastBread.csv	WHT_Q5I7L2	157220000000	114720000000	147580000000	Ribosomal protein L11 OS=Triticum aestivum OX=4565 GN=CFC21_034625 PE=1 SV=1
PlainYeastBread.csv	WHT_W5FV77	895650000	7133500000	6920900000	40S ribosomal protein S23 OS=Triticum aestivum OX=4565 GN=CFC21_036826 PE=3 SV=1
PlainYeastBread.csv	CS_P04802	19481000000	181770000000	63046000000	Aspartate--tRNA ligase cytoplasmic OS=Saccharomyces cerevisiae (strain ATCC 204508 / S288c) OX=559292 GN=DPS1 PE=1 SV=3
PlainYeastBread.csv	WHT_A0A3B6EAD8	2967600000	13941000000	0	Uncharacterized protein OS=Triticum aestivum OX=4565 GN=CFC21_033252 PE=3 SV=1
PlainYeastBread.csv	BRL_F2EC88	43767000000	30004000000	31686000000	Predicted protein OS=Hordeum vulgare subsp. vulgare OX=112509 PE=2 SV=1
PlainYeastBread.csv	CS_P33297	6911100000	639900000	2838700000	26S proteasome regulatory subunit 6A OS=Saccharomyces cerevisiae (strain ATCC 204508 / S288c) OX=559292 GN=RPT5 PE=1 SV=3
PlainYeastBread.csv	WHT_A0A3B6MZQ3	25085000000	4829000000	24882000000	Uncharacterized protein OS=Triticum aestivum OX=4565 GN=CFC21_080209 PE=3 SV=1
PlainYeastBread.csv	BRL_F2D807	19993000000	28895000000	16498000000	D-3-phosphoglycerate dehydrogenase OS=Hordeum vulgare subsp. vulgare OX=112509 PE=2 SV=1
PlainYeastBread.csv	WHT_A0A3B6B623	19993000000	28895000000	16498000000	D-3-phosphoglycerate dehydrogenase OS=Triticum aestivum OX=4565 PE=3 SV=1
PlainYeastBread.csv	WHT_A0A3B6AVX5		34504000000	10231000000	Succinate--CoA ligase [ADP-forming] subunit alpha mitochondrial OS=Triticum aestivum OX=4565 GN=CFC21_016226 PE=3 SV=1
PlainYeastBread.csv	BRL_A0A8I6XYT6	3852200000	4510400000	0	Aspartic proteinase oryzasin-1 OS=Hordeum vulgare subsp. vulgare OX=112509 PE=3 SV=1
PlainYeastBread.csv	CS_P26321	92782000000	89989000000	6817000000	Large ribosomal subunit protein uL18 OS=Saccharomyces cerevisiae (strain ATCC 204508 / S288c) OX=559292 GN=RPL5 PE=1 SV=4
PlainYeastBread.csv	WHT_A0A3B6B7S9	156750000000	289610000000	203260000000	Plant antimicrobial peptide domain-containing protein OS=Triticum aestivum OX=4565 GN=CFC21_019727 PE=4 SV=1
PlainYeastBread.csv	WHT_A0A3B6KRY8	46196000000	43284000000	2863000000	H15 domain-containing protein OS=Triticum aestivum OX=4565 GN=CFC21_068246 PE=3 SV=1
PlainYeastBread.csv	BRL_A0A8I7BEB2	15963000000	36658000000	9722600000	Protein phosphatase 2A structural subunit OS=Hordeum vulgare subsp. vulgare OX=112509 PE=4 SV=1
PlainYeastBread.csv	WHT_F6LAX4	15963000000	36658000000	9722600000	Protein phosphatase 2A structural subunit OS=Triticum aestivum OX=4565 GN=CFC21_065446 PE=4 SV=1
PlainYeastBread.csv	SOY_K7K753	49059000000	15569000000	9757300000	DC1 domain-containing protein OS=Glycine max OX=3847 GN=GLYMA_02G085600 PE=4 SV=1
PlainYeastBread.csv	WHT_A0A3B6B1Y1	38324000000	7067000000	37787000000	Glutamate dehydrogenase OS=Triticum aestivum OX=4565 GN=CFC21_018252 PE=3 SV=1
PlainYeastBread.csv	BRL_F2DMU4	38324000000	7067000000	37787000000	Glutamate dehydrogenase OS=Hordeum vulgare subsp. vulgare OX=112509 PE=2 SV=1
PlainYeastBread.csv	WHT_A0A3B6DHI0	38324000000	7067000000	37787000000	Glutamate dehydrogenase OS=Triticum aestivum OX=4565 GN=CFC21_031017 PE=3 SV=1
PlainYeastBread.csv	WHT_Q5I7K5	98834000000	26629000000	70072000000	Ribosomal protein P1 OS=Triticum aestivum OX=4565 GN=CFC21_098223 PE=1 SV=1
PlainYeastBread.csv	WHT_A0A3B6UB41	554000000	60356000000	45674000000	Eukaryotic translation initiation factor 3 subunit J OS=Triticum aestivum OX=4565 GN=CFC21_035526 PE=3 SV=1
PlainYeastBread.csv	WHT_A0A3B6A3G3	3743800000	1285000000	2591900000	Hyaluronan/mRNA-binding protein domain-containing protein OS=Triticum aestivum OX=4565 GN=CFC21_014154 PE=4 SV=1
PlainYeastBread.csv	CS_P36008	26699000000	40576000000	2396000000	Elongation factor 1-gamma 2 OS=Saccharomyces cerevisiae (strain ATCC 204508 / S288c) OX=559292 GN=TEF4 PE=1 SV=1
PlainYeastBread.csv	CS_P25605	3206000000	46546000000	9357600000	Acetolactate synthase small subunit mitochondrial OS=Saccharomyces cerevisiae (strain ATCC 204508 / S288c) OX=559292 GN=ILV6 PE=1 SV=2
PlainYeastBread.csv	BRL_A0A8I6YNZ7	80825000000	118520000000	75451000000	S-(hydroxymethyl)glutathione dehydrogenase OS=Hordeum vulgare subsp. vulgare OX=112509 PE=3 SV=1
PlainYeastBread.csv	WHT_A0A3B6PS43	80825000000	118520000000	75451000000	S-(hydroxymethyl)glutathione dehydrogenase OS=Triticum aestivum OX=4565 GN=CFC21_090133 PE=3 SV=1
PlainYeastBread.csv	BRL_A0A8I7B605	23606000000	70391000000	33975000000	tRNA-binding domain-containing protein OS=Hordeum vulgare subsp. vulgare OX=112509 PE=4 SV=1
PlainYeastBread.csv	WHT_A0A3B6EKM1	23606000000	70391000000	33975000000	tRNA-binding domain-containing protein OS=Triticum aestivum OX=4565 GN=CFC21_036738 PE=4 SV=1
PlainYeastBread.csv	WHT_A0A3B5ZQE8	30807000000	61481000000	40661000000	Large ribosomal subunit protein uL15/eL18 domain-containing protein OS=Triticum aestivum OX=4565 PE=3 SV=1
PlainYeastBread.csv	WHT_A0A3B6C600	9332300000	14358000000	209800000	Importin N-terminal domain-containing protein OS=Triticum aestivum OX=4565 GN=CFC21_022777 PE=4 SV=1
PlainYeastBread.csv	CS_P32381	9018200000	0	0	Actin-related protein 2 OS=Saccharomyces cerevisiae (strain ATCC 204508 / S288c) OX=559292 GN=ARP2 PE=1 SV=1
PlainYeastBread.csv	CS_P53228	5688000000	128370000000	49828000000	Transaldolase NQM1 OS=Saccharomyces cerevisiae (strain ATCC 204508 / S288c) OX=559292 GN=NQM1 PE=1 SV=1
PlainYeastBread.csv	BRL_A0A8I6XFJ2	64925000000	86244000000	28451000000	fumarate hydratase OS=Hordeum vulgare subsp. vulgare OX=112509 PE=3 SV=1
PlainYeastBread.csv	WHT_A0A0C4BJJ8	64925000000	86244000000	28451000000	fumarate hydratase OS=Triticum aestivum OX=4565 GN=CFC21_052167 PE=3 SV=1
PlainYeastBread.csv	CS_P32473	22629000000	42483000000	21671000000	Pyruvate dehydrogenase E1 component subunit beta mitochondrial OS=Saccharomyces cerevisiae (strain ATCC 204508 / S288c) OX=559292 GN=PDB1 PE=1 SV=2
PlainYeastBread.csv	CS_P54113	6303300000	14297000000	658770000000	Bifunctional purine biosynthesis protein ADE16 OS=Saccharomyces cerevisiae (strain ATCC 204508 / S288c) OX=559292 GN=ADE16 PE=1 SV=1
PlainYeastBread.csv	WHT_A0A3B5XXG2		3382500000	1705000000	H(+)-exporting diphosphatase OS=Triticum aestivum OX=4565 PE=3 SV=1
PlainYeastBread.csv	BRL_M0XI18	3048700000		16100000	Histone H2A OS=Hordeum vulgare subsp. vulgare OX=112509 PE=3 SV=1
PlainYeastBread.csv	WHT_A0A1D5YKH2	3048700000		16100000	Histone H2A OS=Triticum aestivum OX=4565 GN=CFC21_067614 PE=3 SV=1
PlainYeastBread.csv	CS_P0C0X0	66788000000	24825000000	21223000000	Small ribosomal subunit protein eS28B OS=Saccharomyces cerevisiae (strain ATCC 204508 / S288c) OX=559292 GN=RPS28B PE=1 SV=1
PlainYeastBread.csv	WHT_A0A3B6SSI9	83183000000	138130000000	57929000000	Protein kinase domain-containing protein OS=Triticum aestivum OX=4565 GN=CFC21_105441 PE=4 SV=1
PlainYeastBread.csv	WHT_W5FSM8	4886100000		3523400000	Uncharacterized protein OS=Triticum aestivum OX=4565 GN=CFC21_071208 PE=3 SV=1
PlainYeastBread.csv	CS_O14467	15233000000	39683000000	34494000000	Multiprotein-bridging factor 1 OS=Saccharomyces cerevisiae (strain ATCC 204508 / S288c) OX=559292 GN=MBF1 PE=1 SV=2
PlainYeastBread.csv	WHT_A0A3B6GUF3	14591000000	20375000000	8273200000	Ribokinase OS=Triticum aestivum OX=4565 GN=CFC21_047578 PE=3 SV=1
PlainYeastBread.csv	CS_P53312	19175000000	29541000000	7730700000	Succinate--CoA ligase [ADP-forming] subunit beta mitochondrial OS=Saccharomyces cerevisiae (strain ATCC 204508 / S288c) OX=559292 GN=LSC2 PE=1 SV=1
PlainYeastBread.csv	WHT_A0A3B6H0D7		2055500000	0	UspA domain-containing protein OS=Triticum aestivum OX=4565 GN=CFC21_048337 PE=4 SV=1
PlainYeastBread.csv	WHT_A0A3B6C7C1	993080000	4816500000	154850000	DUF4149 domain-containing protein OS=Triticum aestivum OX=4565 GN=CFC21_023807 PE=4 SV=1
PlainYeastBread.csv	WHT_A0A3B6SMV6		978200000	4722300000	Uncharacterized protein OS=Triticum aestivum OX=4565 PE=4 SV=1
PlainYeastBread.csv	WHT_W5H631	47246000000	26869000000	30544000000	60S ribosomal protein L27 OS=Triticum aestivum OX=4565 GN=CFC21_100449 PE=3 SV=1
PlainYeastBread.csv	WHT_A0A3B6HTK9	3797600000	20391000000	11142000000	Coatomer subunit gamma OS=Triticum aestivum OX=4565 GN=CFC21_051585 PE=3 SV=1
PlainYeastBread.csv	WHT_A0A3B6JGM3	7903900000	21529000000	3430700000	PdxS/SNZ N-terminal domain-containing protein OS=Triticum aestivum OX=4565 GN=CFC21_061309 PE=3 SV=1
PlainYeastBread.csv	BRL_F2DUQ7	7903900000	21529000000	3430700000	Predicted protein OS=Hordeum vulgare subsp. vulgare OX=112509 PE=2 SV=1
PlainYeastBread.csv	BRL_A0A8I6YNG2	27946000000	59906000000	24524000000	PABS domain-containing protein OS=Hordeum vulgare subsp. vulgare OX=112509 PE=3 SV=1
PlainYeastBread.csv	WHT_A0A3B6C8B0	28516000000	25639000000	10996000000	Prohibitin OS=Triticum aestivum OX=4565 PE=3 SV=1
PlainYeastBread.csv	WHT_A0A3B6A2W3	9450700000	49475000000	29762000000	C2H2-type domain-containing protein OS=Triticum aestivum OX=4565 GN=CFC21_014285 PE=3 SV=1
PlainYeastBread.csv	WHT_A0A096ULG3	62652000000	112840000000	86735000000	Large ribosomal subunit protein eL14 domain-containing protein OS=Triticum aestivum OX=4565 GN=CFC21_018185 PE=3 SV=1
PlainYeastBread.csv	CS_P14065	27077000000	17455000000	13767000000	Glycerol 2-dehydrogenase (NADP(+)) OS=Saccharomyces cerevisiae (strain ATCC 204508 / S288c) OX=559292 GN=GCY1 PE=1 SV=1
PlainYeastBread.csv	WHT_A0A3B6KDG2	1179000000	16835000000	6030700000	Homoserine dehydrogenase OS=Triticum aestivum OX=4565 GN=CFC21_065197 PE=3 SV=1
PlainYeastBread.csv	CS_P02992	21057000000	47081000000	12654000000	Elongation factor Tu mitochondrial OS=Saccharomyces cerevisiae (strain ATCC 204508 / S288c) OX=559292 GN=TUF1 PE=1 SV=1
PlainYeastBread.csv	CS_P38934	8610500000	20408000000	5436300000	Nuclear segregation protein BFR1 OS=Saccharomyces cerevisiae (strain ATCC 204508 / S288c) OX=559292 GN=BFR1 PE=1 SV=1
PlainYeastBread.csv	BRL_F2CTD7	37607000000	45602000000	24795000000	Peptidyl-prolyl cis-trans isomerase OS=Hordeum vulgare subsp. vulgare OX=112509 PE=1 SV=1
PlainYeastBread.csv	BRL_A0A8I6YUB6	5448200000	37834000000	2664500000	T-complex protein 1 subunit alpha OS=Hordeum vulgare subsp. vulgare OX=112509 PE=3 SV=1
PlainYeastBread.csv	WHT_A0A3B6SBA3	5448200000	37834000000	2664500000	T-complex protein 1 subunit alpha OS=Triticum aestivum OX=4565 PE=3 SV=1
PlainYeastBread.csv	BRL_A0A8I6YB73	38419000000	62299000000	31253000000	Endoplasmic reticulum oxidoreductin-1 OS=Hordeum vulgare subsp. vulgare OX=112509 PE=3 SV=1
PlainYeastBread.csv	WHT_A0A3B6I042	38419000000	62299000000	31253000000	Endoplasmic reticulum oxidoreductin-1 OS=Triticum aestivum OX=4565 GN=CFC21_053281 PE=3 SV=1
PlainYeastBread.csv	WHT_A0A3B6JFX9		0		UDP-glucose 6-dehydrogenase OS=Triticum aestivum OX=4565 GN=CFC21_061097 PE=3 SV=1
PlainYeastBread.csv	WHT_A0A3B6PSK7	11585000000	26922000000	5102600000	protein-serine/threonine phosphatase OS=Triticum aestivum OX=4565 GN=CFC21_089848 PE=3 SV=1
PlainYeastBread.csv	BRL_A0A8I6YN24	13425000000	27396000000	10858000000	AAA+ ATPase domain-containing protein OS=Hordeum vulgare subsp. vulgare OX=112509 PE=3 SV=1
PlainYeastBread.csv	WHT_A0A3B6R960	189660000000	239650000000	137010000000	Profilin OS=Triticum aestivum OX=4565 GN=CFC21_096045 PE=3 SV=1
PlainYeastBread.csv	WHT_A0A3B6SG73	19774000000	1563000000	12622000000	Carbohydrate kinase PfkB domain-containing protein OS=Triticum aestivum OX=4565 GN=CFC21_103311 PE=4 SV=1
PlainYeastBread.csv	BRL_A0A8I6WER7	19774000000	1563000000	12622000000	Carbohydrate kinase PfkB domain-containing protein OS=Hordeum vulgare subsp. vulgare OX=112509 PE=4 SV=1
PlainYeastBread.csv	WHT_A0A3B6TIS2	14027000000	34183000000	23071000000	peptidylprolyl isomerase OS=Triticum aestivum OX=4565 GN=CFC21_109002 PE=4 SV=1
PlainYeastBread.csv	CS_P32449	1084000000	6164200000	13458000000	Phospho-2-dehydro-3-deoxyheptonate aldolase tyrosine-inhibited OS=Saccharomyces cerevisiae (strain ATCC 204508 / S288c) OX=559292 GN=ARO4 PE=1 SV=2
PlainYeastBread.csv	BRL_A0A287DTW3	419660000000	47450000000	387050000000	Bowman-Birk serine protease inhibitors family domain-containing protein OS=Hordeum vulgare subsp. vulgare OX=112509 PE=4 SV=1
PlainYeastBread.csv	WHT_W5ACP2	419660000000	47450000000	387050000000	Bowman-Birk serine protease inhibitors family domain-containing protein OS=Triticum aestivum OX=4565 GN=CFC21_007491 PE=4 SV=1
PlainYeastBread.csv	WHT_A0A341P3U8	419660000000	47450000000	387050000000	Bowman-Birk serine protease inhibitors family domain-containing protein OS=Triticum aestivum OX=4565 GN=CFC21_007485 PE=4 SV=1
PlainYeastBread.csv	WHT_W5ASA4	3712000000	56547000000	34398000000	Genome assembly chromosome: II OS=Triticum aestivum OX=4565 GN=CAMPLR22A2D_LOCUS2419 PE=3 SV=1
PlainYeastBread.csv	WHT_A0A3B6CE87	391400000	1517700000	5495500000	Serine hydroxymethyltransferase OS=Triticum aestivum OX=4565 GN=CFC21_025806 PE=3 SV=1
PlainYeastBread.csv	CS_P32340	28281000000	23482000000	0	Rotenone-insensitive NADH-ubiquinone oxidoreductase mitochondrial OS=Saccharomyces cerevisiae (strain ATCC 204508 / S288c) OX=559292 GN=NDI1 PE=1 SV=1
PlainYeastBread.csv	BRL_A0A8I6YA06	9877500000	328000000	20243000000	6-phosphogluconate dehydrogenase decarboxylating OS=Hordeum vulgare subsp. vulgare OX=112509 PE=3 SV=1
PlainYeastBread.csv	WHT_A0A3B6I6K2	9877500000	328000000	20243000000	6-phosphogluconate dehydrogenase decarboxylating OS=Triticum aestivum OX=4565 GN=CFC21_055414 PE=3 SV=1
PlainYeastBread.csv	WHT_A0A3B6NRD3		6498500000	4757300000	Non-haem dioxygenase N-terminal domain-containing protein OS=Triticum aestivum OX=4565 PE=4 SV=1
PlainYeastBread.csv	CS_P25294	4059800000	15853000000	5257900000	Protein SIS1 OS=Saccharomyces cerevisiae (strain ATCC 204508 / S288c) OX=559292 GN=SIS1 PE=1 SV=1
PlainYeastBread.csv	CS_P47143	2188000000	79265000000	14133000000	Adenosine kinase OS=Saccharomyces cerevisiae (strain ATCC 204508 / S288c) OX=559292 GN=ADO1 PE=1 SV=1
PlainYeastBread.csv	BRL_A0A287ULF4		11822000000	4654900000	Non-haem dioxygenase N-terminal domain-containing protein OS=Hordeum vulgare subsp. vulgare OX=112509 PE=4 SV=1
PlainYeastBread.csv	WHT_A0A3B5XYX2	18243000000	18719000000	9977500000	2-oxoadipate dioxygenase/decarboxylase OS=Triticum aestivum OX=4565 PE=3 SV=1
PlainYeastBread.csv	WHT_A0A3B6C182		12591000000	3768700000	Ancestral coatomer element 1 Sec16/Sec31 domain-containing protein OS=Triticum aestivum OX=4565 PE=3 SV=1
PlainYeastBread.csv	WHT_A0A3B6HQA9	0	29114000000	16028000000	SHSP domain-containing protein OS=Triticum aestivum OX=4565 GN=CFC21_051736 PE=3 SV=1
PlainYeastBread.csv	WHT_A0A3B6NXW9	2108800000	10663000000	5790300000	T-complex protein 1 subunit zeta OS=Triticum aestivum OX=4565 GN=CFC21_085411 PE=3 SV=1
PlainYeastBread.csv	BRL_A0A8I6YZB3	2108800000	10663000000	5790300000	T-complex protein 1 subunit zeta OS=Hordeum vulgare subsp. vulgare OX=112509 PE=3 SV=1
PlainYeastBread.csv	CS_P12695	52945000000	61566000000	30146000000	Dihydrolipoyllysine-residue acetyltransferase component of pyruvate dehydrogenase complex mitochondrial OS=Saccharomyces cerevisiae (strain ATCC 204508 / S288c) OX=559292 GN=LAT1 PE=1 SV=1
PlainYeastBread.csv	WHT_W5BSX7	160390000000	286430000000	9186000000	Genome assembly chromosome: II OS=Triticum aestivum OX=4565 GN=CAMPLR22A2D_LOCUS3027 PE=3 SV=1
PlainYeastBread.csv	WHT_A0A3B6PN46	1964500000	9172900000	1521600000	Enhancer of mRNA-decapping protein 4 WD40 repeat region domain-containing protein OS=Triticum aestivum OX=4565 PE=3 SV=1
PlainYeastBread.csv	WHT_A0A3B6NRK4	1964500000	4601100000	1521600000	Enhancer of mRNA-decapping protein 4 WD40 repeat region domain-containing protein OS=Triticum aestivum OX=4565 PE=3 SV=1
PlainYeastBread.csv	WHT_A0A3B6QKD8	1964500000	7890900000	1521600000	Enhancer of mRNA-decapping protein 4 WD40 repeat region domain-containing protein OS=Triticum aestivum OX=4565 GN=CFC21_093464 PE=3 SV=1
PlainYeastBread.csv	CS_P0CX56	166860000000	144540000000	123030000000	Small ribosomal subunit protein uS13B OS=Saccharomyces cerevisiae (strain ATCC 204508 / S288c) OX=559292 GN=RPS18B PE=1 SV=1
PlainYeastBread.csv	CS_P05743	213620000000	343550000000	168210000000	Large ribosomal subunit protein uL24A OS=Saccharomyces cerevisiae (strain ATCC 204508 / S288c) OX=559292 GN=RPL26A PE=1 SV=3
PlainYeastBread.csv	WHT_A0A3B5Y2Y6		5685700000	20497000000	Heat shock 70 kDa protein mitochondrial OS=Triticum aestivum OX=4565 PE=3 SV=1
PlainYeastBread.csv	WHT_A0A3B6KDR3	5438300000	10627000000	2384200000	HECT-type E3 ubiquitin transferase OS=Triticum aestivum OX=4565 PE=3 SV=1
PlainYeastBread.csv	WHT_A0A3B6TW80	49216000000	8272000000	53469000000	Knottin scorpion toxin-like domain-containing protein OS=Triticum aestivum OX=4565 GN=CFC21_110587 PE=4 SV=1
PlainYeastBread.csv	CS_P26785	68539000000	95673000000	54486000000	Large ribosomal subunit protein uL13B OS=Saccharomyces cerevisiae (strain ATCC 204508 / S288c) OX=559292 GN=RPL16B PE=1 SV=3
PlainYeastBread.csv	CS_P54839	14061000000	1251000000	7487900000	Hydroxymethylglutaryl-CoA synthase OS=Saccharomyces cerevisiae (strain ATCC 204508 / S288c) OX=559292 GN=ERG13 PE=1 SV=1
PlainYeastBread.csv	WHT_A0A3B5ZM30	8738000000	111540000000	66934000000	Omega gliadin OS=Triticum aestivum OX=4565 PE=4 SV=1
PlainYeastBread.csv	CS_Q12118	13004000000	19509000000	7797200000	Small glutamine-rich tetratricopeptide repeat-containing protein 2 OS=Saccharomyces cerevisiae (strain ATCC 204508 / S288c) OX=559292 GN=SGT2 PE=1 SV=1
PlainYeastBread.csv	CS_P04801	0	17754000000	11127000000	Threonine--tRNA ligase cytoplasmic OS=Saccharomyces cerevisiae (strain ATCC 204508 / S288c) OX=559292 GN=THS1 PE=1 SV=2
PlainYeastBread.csv	WHT_A0A3B6LXV2	8823800000	6733900000	6959500000	Bifunctional inhibitor/plant lipid transfer protein/seed storage helical domain-containing protein OS=Triticum aestivum OX=4565 GN=CFC21_074920 PE=3 SV=1
PlainYeastBread.csv	WHT_A0A3B6RKR7	0	21829000000	4891300000	Dolichyl-diphosphooligosaccharide--protein glycosyltransferase 48 kDa subunit OS=Triticum aestivum OX=4565 GN=CFC21_099240 PE=3 SV=1
PlainYeastBread.csv	WHT_A0A3B6TGM9	8415700000	19943000000	15454000000	Pectate lyase superfamily protein domain-containing protein OS=Triticum aestivum OX=4565 GN=CFC21_106476 PE=3 SV=1
PlainYeastBread.csv	WHT_A0A3B6KR72	843900000	0	15672000000	H15 domain-containing protein OS=Triticum aestivum OX=4565 GN=CFC21_068240 PE=3 SV=1
PlainYeastBread.csv	WHT_A0A3B5YWZ3	64438000000	116620000000	49972000000	40S ribosomal protein S17 OS=Triticum aestivum OX=4565 GN=CFC21_006450 PE=3 SV=1
PlainYeastBread.csv	BRL_A0A8I6WIX1	229390000	0	17383000000	Heat shock cognate 70 kDa protein OS=Hordeum vulgare subsp. vulgare OX=112509 PE=3 SV=1
PlainYeastBread.csv	WHT_A0A0C4BIR6	139410000000	286350000000	155230000000	Uncharacterized protein OS=Triticum aestivum OX=4565 GN=CFC21_006009 PE=3 SV=1
PlainYeastBread.csv	WHT_A0A077RQG8	47225000000	57526000000	28279000000	SHSP domain-containing protein OS=Triticum aestivum OX=4565 GN=CFC21_040237 PE=3 SV=1
PlainYeastBread.csv	BRL_A0A8I6Y2R3	165300000	15659000000	4882500000	Glucose-6-phosphate isomerase OS=Hordeum vulgare subsp. vulgare OX=112509 PE=3 SV=1
PlainYeastBread.csv	WHT_A0A3B6LNA8	165300000	15659000000	4882500000	Glucose-6-phosphate isomerase OS=Triticum aestivum OX=4565 GN=CFC21_072000 PE=1 SV=1
PlainYeastBread.csv	WHT_A0A3B6CD87	22368000000	31604000000	2017000000	RRM domain-containing protein OS=Triticum aestivum OX=4565 PE=4 SV=1
PlainYeastBread.csv	BRL_F2D1G5	22368000000	31604000000	2017000000	Predicted protein OS=Hordeum vulgare subsp. vulgare OX=112509 PE=2 SV=1
PlainYeastBread.csv	WHT_A0A3B6LFF9	18627000000	19898000000	21271000000	SMP domain-containing protein OS=Triticum aestivum OX=4565 GN=CFC21_069623 PE=3 SV=1
PlainYeastBread.csv	WHT_A0A3B6SF83	11541000000	56701000000	30462000000	T-complex protein 1 subunit delta OS=Triticum aestivum OX=4565 GN=CFC21_101630 PE=3 SV=1
PlainYeastBread.csv	WHT_A0A3B6MYA6	29579000000	54102000000	25476000000	Eukaryotic translation initiation factor 3 subunit B OS=Triticum aestivum OX=4565 PE=3 SV=1
PlainYeastBread.csv	CS_P36013	3662700000	14026000000	4990500000	NAD-dependent malic enzyme mitochondrial OS=Saccharomyces cerevisiae (strain ATCC 204508 / S288c) OX=559292 GN=MAE1 PE=1 SV=1
PlainYeastBread.csv	WHT_A0A3B6SHS2	431300000	10364000000	530200000	Enhancer of mRNA-decapping protein 4 WD40 repeat region domain-containing protein OS=Triticum aestivum OX=4565 GN=CFC21_102266 PE=3 SV=1
PlainYeastBread.csv	WHT_A0A3B6TCZ0	431300000	10364000000	530200000	Enhancer of mRNA-decapping protein 4 WD40 repeat region domain-containing protein OS=Triticum aestivum OX=4565 PE=3 SV=1
PlainYeastBread.csv	BRL_A0A8I6YLC9	431300000	10364000000	530200000	Enhancer of mRNA-decapping protein 4 WD40 repeat region domain-containing protein OS=Hordeum vulgare subsp. vulgare OX=112509 PE=3 SV=1
PlainYeastBread.csv	CS_P34167	8632400000	17483000000	6662200000	Eukaryotic translation initiation factor 4B OS=Saccharomyces cerevisiae (strain ATCC 204508 / S288c) OX=559292 GN=TIF3 PE=1 SV=1
PlainYeastBread.csv	BRL_F2D6C1	5614900000	20066000000	12652000000	Predicted protein OS=Hordeum vulgare subsp. vulgare OX=112509 PE=2 SV=1
PlainYeastBread.csv	WHT_A0A3B6ITH3	5614900000	20066000000	12652000000	Uncharacterized protein OS=Triticum aestivum OX=4565 GN=CFC21_058839 PE=3 SV=1
PlainYeastBread.csv	WHT_A0A3B6MXN3	389480000000	481110000000	28120000000	Bifunctional inhibitor/plant lipid transfer protein/seed storage helical domain-containing protein OS=Triticum aestivum OX=4565 GN=CFC21_079847 PE=4 SV=1
PlainYeastBread.csv	WHT_A0A140KPV0	43712000000	5023000000	27846000000	GA3ox-B3 protein OS=Triticum aestivum OX=4565 GN=GA3ox-B3 PE=3 SV=1
PlainYeastBread.csv	CS_P47117	70340000	0	0	Actin-related protein 3 OS=Saccharomyces cerevisiae (strain ATCC 204508 / S288c) OX=559292 GN=ARP3 PE=1 SV=1
PlainYeastBread.csv	CS_P18899	44499000000	100450000000	67681000000	Stress protein DDR48 OS=Saccharomyces cerevisiae (strain ATCC 204508 / S288c) OX=559292 GN=DDR48 PE=1 SV=4
PlainYeastBread.csv	WHT_A0A3B6B3J1	52828000000	68397000000	53733000000	FAS1 domain-containing protein OS=Triticum aestivum OX=4565 GN=CFC21_018328 PE=3 SV=1
PlainYeastBread.csv	CS_P50263	154070000000	221660000000	302840000000	Protein SIP18 OS=Saccharomyces cerevisiae (strain ATCC 204508 / S288c) OX=559292 GN=SIP18 PE=1 SV=1
PlainYeastBread.csv	WHT_A0A077RU59	6596800000	9919500000	3213600000	Trehalose 6-phosphate phosphatase OS=Triticum aestivum OX=4565 GN=CFC21_042181 PE=3 SV=1
PlainYeastBread.csv	BRL_F2DGV1	6596800000	9919500000	3213600000	Trehalose 6-phosphate phosphatase OS=Hordeum vulgare subsp. vulgare OX=112509 PE=2 SV=1
PlainYeastBread.csv	CS_Q12159	25218000000	52151000000	2022000000	RNA annealing protein YRA1 OS=Saccharomyces cerevisiae (strain ATCC 204508 / S288c) OX=559292 GN=YRA1 PE=1 SV=2
PlainYeastBread.csv	WHT_A0A3B6ECS7	52137000000	9219000000	35813000000	PH domain-containing protein OS=Triticum aestivum OX=4565 GN=CFC21_034013 PE=4 SV=1
PlainYeastBread.csv	WHT_A0A3B6FKP0	52137000000	9219000000	35813000000	PH domain-containing protein OS=Triticum aestivum OX=4565 GN=CFC21_039831 PE=4 SV=1
PlainYeastBread.csv	WHT_A0A077RST9	1512700000		28672000000	Glucan endo-1 3-beta-D-glucosidase OS=Triticum aestivum OX=4565 GN=CFC21_044244 PE=3 SV=1
PlainYeastBread.csv	WHT_W5F8V5	786500000	43148000000	15314000000	Eukaryotic translation initiation factor 3 subunit E OS=Triticum aestivum OX=4565 GN=CFC21_072153 PE=3 SV=1
PlainYeastBread.csv	WHT_A0A3B6SHA8	9538100000	35617000000	15448000000	Caffeoyl-CoA O-methyltransferase OS=Triticum aestivum OX=4565 GN=CFC21_102371 PE=3 SV=1
PlainYeastBread.csv	CS_P61830	567410000		7058200000	Histone H3 OS=Saccharomyces cerevisiae (strain ATCC 204508 / S288c) OX=559292 GN=HHT2 PE=1 SV=2
PlainYeastBread.csv	WHT_A0A3B6NRL1	2259800000	2622800000	1889800000	PCI domain-containing protein OS=Triticum aestivum OX=4565 GN=CFC21_083557 PE=4 SV=1
PlainYeastBread.csv	BRL_A0A8I6W5Q4	29559000000	19166000000	23294000000	Prefoldin subunit 5 OS=Hordeum vulgare subsp. vulgare OX=112509 PE=3 SV=1
PlainYeastBread.csv	WHT_A0A3B5ZU67	29559000000	19166000000	23294000000	Prefoldin subunit 5 OS=Triticum aestivum OX=4565 GN=CFC21_011326 PE=3 SV=1
PlainYeastBread.csv	CS_P0C2H9	93564000000	122660000000	69443000000	Large ribosomal subunit protein eL31B OS=Saccharomyces cerevisiae (strain ATCC 204508 / S288c) OX=559292 GN=RPL31B PE=1 SV=1
PlainYeastBread.csv	CS_Q12305	45086000000	42184000000	36306000000	Thiosulfate:glutathione sulfurtransferase OS=Saccharomyces cerevisiae (strain ATCC 204508 / S288c) OX=559292 GN=RDL1 PE=1 SV=1
PlainYeastBread.csv	WHT_A0A3B6CED7	17651000000			Uncharacterized protein OS=Triticum aestivum OX=4565 PE=3 SV=1
PlainYeastBread.csv	WHT_A0A3B6PQ18	12748000000	13949000000	12017000000	peptidylprolyl isomerase OS=Triticum aestivum OX=4565 GN=CFC21_089301 PE=4 SV=1
PlainYeastBread.csv	CS_P38715	9754500000	23668000000	20285000000	NADPH-dependent aldose reductase GRE3 OS=Saccharomyces cerevisiae (strain ATCC 204508 / S288c) OX=559292 GN=GRE3 PE=1 SV=1
PlainYeastBread.csv	CS_P41338	25241000000	31335000000	11751000000	Acetyl-CoA acetyltransferase OS=Saccharomyces cerevisiae (strain ATCC 204508 / S288c) OX=559292 GN=ERG10 PE=1 SV=3
PlainYeastBread.csv	CS_P31688	5243400000	17875000000	4443400000	Trehalose-phosphatase OS=Saccharomyces cerevisiae (strain ATCC 204508 / S288c) OX=559292 GN=TPS2 PE=1 SV=3
PlainYeastBread.csv	WHT_A0A3B6B204	7633000000	96731000000	61459000000	Large ribosomal subunit protein uL23 N-terminal domain-containing protein OS=Triticum aestivum OX=4565 GN=CFC21_010645 PE=3 SV=1
PlainYeastBread.csv	WHT_A0A3B6FPH1	966290000	9580700000	961820000	ATP citrate synthase OS=Triticum aestivum OX=4565 GN=CFC21_041145 PE=4 SV=1
PlainYeastBread.csv	CS_P11412	10098000000	1129000000	595100000	Glucose-6-phosphate 1-dehydrogenase OS=Saccharomyces cerevisiae (strain ATCC 204508 / S288c) OX=559292 GN=ZWF1 PE=1 SV=4
PlainYeastBread.csv	CS_P38013	30725000000	88013000000	36726000000	Peroxiredoxin AHP1 OS=Saccharomyces cerevisiae (strain ATCC 204508 / S288c) OX=559292 GN=AHP1 PE=1 SV=4
PlainYeastBread.csv	WHT_W5AP46	65191000000	101440000000	4824000000	Genome assembly chromosome: II OS=Triticum aestivum OX=4565 GN=CAMPLR22A2D_LOCUS2926 PE=1 SV=1
PlainYeastBread.csv	BRL_F2E2Z7	10753000000	5459400000	18418000000	Predicted protein OS=Hordeum vulgare subsp. vulgare OX=112509 PE=2 SV=1
PlainYeastBread.csv	BRL_A0A8I7B9Z9	4823400000	6563200000	5171400000	Glutathione S-transferase OS=Hordeum vulgare subsp. vulgare OX=112509 PE=3 SV=1
PlainYeastBread.csv	WHT_A0A3B5ZRV5	5371300000	7909300000	3562200000	histidine--tRNA ligase OS=Triticum aestivum OX=4565 GN=CFC21_010687 PE=3 SV=1
PlainYeastBread.csv	WHT_A0A3B6LWF0	1816900000000	1542400000000	13791000000	Dihydrolipoamide acetyltransferase component of pyruvate dehydrogenase complex OS=Triticum aestivum OX=4565 GN=CFC21_074461 PE=3 SV=1
PlainYeastBread.csv	BRL_A0A8I7BEZ0		9144900000	7937800000	Abscisic acid receptor PYL2 OS=Hordeum vulgare subsp. vulgare OX=112509 PE=4 SV=1
PlainYeastBread.csv	CS_Q03048	49186000000	3870800000	16121000000	Cofilin OS=Saccharomyces cerevisiae (strain ATCC 204508 / S288c) OX=559292 GN=COF1 PE=1 SV=1
PlainYeastBread.csv	WHT_A0A3B6DPL3	14579000000	35135000000	13515000000	Peroxidase OS=Triticum aestivum OX=4565 GN=CFC21_033002 PE=3 SV=1
PlainYeastBread.csv	WHT_A0A3B6SI06	13258000000	92357000000	50483000000	Oleosin OS=Triticum aestivum OX=4565 GN=CFC21_102336 PE=3 SV=1
PlainYeastBread.csv	WHT_A0A3B6JDJ0	24215000000	25143000000	1436000000	RRM domain-containing protein OS=Triticum aestivum OX=4565 GN=CFC21_060148 PE=4 SV=1
PlainYeastBread.csv	CS_P07991	7254300000	393500000	40700000	Ornithine aminotransferase OS=Saccharomyces cerevisiae (strain ATCC 204508 / S288c) OX=559292 GN=CAR2 PE=1 SV=2
PlainYeastBread.csv	BRL_F2DMF8	12962000000	57728000000	8456600000	Adenylosuccinate synthetase chloroplastic OS=Hordeum vulgare subsp. vulgare OX=112509 GN=PURA PE=2 SV=1
PlainYeastBread.csv	CS_P00815	313900000	19023000000	1067600000	Histidine biosynthesis trifunctional protein OS=Saccharomyces cerevisiae (strain ATCC 204508 / S288c) OX=559292 GN=HIS4 PE=1 SV=3
PlainYeastBread.csv	WHT_A0A3B6CEE9		6943400000	1911400000	UDP-arabinopyranose mutase OS=Triticum aestivum OX=4565 GN=CFC21_025848 PE=3 SV=1
PlainYeastBread.csv	CS_P11986	9458100000	3702300000	2419700000	Inositol-3-phosphate synthase OS=Saccharomyces cerevisiae (strain ATCC 204508 / S288c) OX=559292 GN=INO1 PE=1 SV=3
PlainYeastBread.csv	BRL_A0A8I6YKI3	3458100000	38364000000	8942300000	Aconitase A/isopropylmalate dehydratase small subunit swivel domain-containing protein OS=Hordeum vulgare subsp. vulgare OX=112509 PE=4 SV=1
PlainYeastBread.csv	WHT_A0A3B6NRS7	3458100000	38364000000	8942300000	Aconitase A/isopropylmalate dehydratase small subunit swivel domain-containing protein OS=Triticum aestivum OX=4565 GN=CFC21_083856 PE=4 SV=1
PlainYeastBread.csv	CS_P48589	59691000000	84063000000	58531000000	Small ribosomal subunit protein eS12 OS=Saccharomyces cerevisiae (strain ATCC 204508 / S288c) OX=559292 GN=RPS12 PE=1 SV=1
PlainYeastBread.csv	CS_P05744	4611000000	52439000000	45657000000	Large ribosomal subunit protein eL33A OS=Saccharomyces cerevisiae (strain ATCC 204508 / S288c) OX=559292 GN=RPL33A PE=1 SV=3
PlainYeastBread.csv	WHT_A0A1D6DET1	16557000000	46964000000	10464000000	Genome assembly chromosome: II OS=Triticum aestivum OX=4565 GN=CAMPLR22A2D_LOCUS2138 PE=3 SV=1
PlainYeastBread.csv	BRL_A0A8I6WMV8	16557000000	46964000000	10464000000	Uncharacterized protein OS=Hordeum vulgare subsp. vulgare OX=112509 PE=3 SV=1
PlainYeastBread.csv	CS_P07143	38171000000	78458000000	39629000000	Cytochrome c1 heme protein mitochondrial OS=Saccharomyces cerevisiae (strain ATCC 204508 / S288c) OX=559292 GN=CYT1 PE=1 SV=1
PlainYeastBread.csv	WHT_A0A3B6LSN3	2192500000	16962000000	11144000000	MBD domain-containing protein OS=Triticum aestivum OX=4565 GN=CFC21_073355 PE=4 SV=1
PlainYeastBread.csv	BRL_A0A8I6Z916	2789600000	4556600000	4187300000	ADP/ATP translocase OS=Hordeum vulgare subsp. vulgare OX=112509 PE=3 SV=1
PlainYeastBread.csv	WHT_A0A3B6SEN2	2789600000	4556600000	4187300000	ADP/ATP translocase OS=Triticum aestivum OX=4565 GN=CFC21_102152 PE=3 SV=1
PlainYeastBread.csv	WHT_A0A3B6TP97	2789600000	4556600000	4187300000	ADP/ATP translocase OS=Triticum aestivum OX=4565 GN=CFC21_108531 PE=3 SV=1
PlainYeastBread.csv	CS_P48164	62665000000	77292000000	41518000000	Small ribosomal subunit protein eS7B OS=Saccharomyces cerevisiae (strain ATCC 204508 / S288c) OX=559292 GN=RPS7B PE=1 SV=1
PlainYeastBread.csv	CS_P50107	384000000	74801000000	15384000000	Glyoxalase I OS=Saccharomyces cerevisiae (strain ATCC 204508 / S288c) OX=559292 GN=GLO1 PE=1 SV=1
PlainYeastBread.csv	CS_P21801	31632000000	56087000000	36217000000	Succinate dehydrogenase [ubiquinone] iron-sulfur subunit mitochondrial OS=Saccharomyces cerevisiae (strain ATCC 204508 / S288c) OX=559292 GN=SDH2 PE=1 SV=1
PlainYeastBread.csv	WHT_A0A3B6RJB7		14754000000	7890100000	Activator of Hsp90 ATPase AHSA1-like N-terminal domain-containing protein OS=Triticum aestivum OX=4565 GN=CFC21_097876 PE=3 SV=1
PlainYeastBread.csv	BRL_F2CSW4	31435000000	37836000000	23552000000	Proteasome subunit alpha type OS=Hordeum vulgare subsp. vulgare OX=112509 PE=2 SV=1
PlainYeastBread.csv	WHT_A0A3B6JNC2	31435000000	37836000000	23552000000	Proteasome subunit alpha type OS=Triticum aestivum OX=4565 GN=CFC21_062993 PE=3 SV=1
PlainYeastBread.csv	BRL_A0A8I6XYU0	3794600000	5736400000	149900000	Protein ROOT HAIR DEFECTIVE 3 homolog OS=Hordeum vulgare subsp. vulgare OX=112509 PE=3 SV=1
PlainYeastBread.csv	WHT_A0A3B6GW85	3794600000	5736400000	149900000	Protein ROOT HAIR DEFECTIVE 3 homolog OS=Triticum aestivum OX=4565 GN=CFC21_047262 PE=3 SV=1
PlainYeastBread.csv	CS_Q03558	94024000000	94611000000	65008000000	NADPH dehydrogenase 2 OS=Saccharomyces cerevisiae (strain ATCC 204508 / S288c) OX=559292 GN=OYE2 PE=1 SV=3
PlainYeastBread.csv	CS_P04076	1146000000	26865000000	10185000000	Argininosuccinate lyase OS=Saccharomyces cerevisiae (strain ATCC 204508 / S288c) OX=559292 GN=ARG4 PE=1 SV=2
PlainYeastBread.csv	CS_P04449	169990000000	242290000000	117070000000	Large ribosomal subunit protein eL24A OS=Saccharomyces cerevisiae (strain ATCC 204508 / S288c) OX=559292 GN=RPL24A PE=1 SV=1
PlainYeastBread.csv	WHT_A0A3B5XUE9	34615000000	81274000000	7407000000	Knottin scorpion toxin-like domain-containing protein OS=Triticum aestivum OX=4565 PE=3 SV=1
PlainYeastBread.csv	CS_P00044	20710000000	267430000000	153770000000	Cytochrome c isoform 1 OS=Saccharomyces cerevisiae (strain ATCC 204508 / S288c) OX=559292 GN=CYC1 PE=1 SV=2
PlainYeastBread.csv	WHT_P40621	31823000000	123790000000	8449000000	HMG1/2-like protein OS=Triticum aestivum OX=4565 PE=2 SV=1
PlainYeastBread.csv	CS_P0C0T4	30852000000	37989000000	24021000000	Small ribosomal subunit protein eS25B OS=Saccharomyces cerevisiae (strain ATCC 204508 / S288c) OX=559292 GN=RPS25B PE=1 SV=1
PlainYeastBread.csv	BRL_F2E3M1	16943000000	59301000000	42932000000	Predicted protein OS=Hordeum vulgare subsp. vulgare OX=112509 PE=2 SV=1
PlainYeastBread.csv	WHT_E0WC53	16943000000	59301000000	42932000000	Genome assembly chromosome: II OS=Triticum aestivum OX=4565 GN=wali7 PE=2 SV=1
PlainYeastBread.csv	BRL_A0A8I6XJD4	15013000000	49759000000	12422000000	CCT-theta OS=Hordeum vulgare subsp. vulgare OX=112509 PE=3 SV=1
PlainYeastBread.csv	WHT_A0A3B6HSG3	15013000000	49759000000	12422000000	CCT-theta OS=Triticum aestivum OX=4565 GN=CFC21_052455 PE=3 SV=1
PlainYeastBread.csv	SOY_I1M290	49671000000		44053000000	KOW domain-containing protein OS=Glycine max OX=3847 GN=100818263 PE=3 SV=1
PlainYeastBread.csv	WHT_A0A3B5Y2C5	374910000000	355740000000	332120000000	Bowman-Birk serine protease inhibitors family domain-containing protein OS=Triticum aestivum OX=4565 PE=4 SV=1
PlainYeastBread.csv	CS_P23542	21344000000	44805000000	16676000000	Aspartate aminotransferase cytoplasmic OS=Saccharomyces cerevisiae (strain ATCC 204508 / S288c) OX=559292 GN=AAT2 PE=1 SV=3
PlainYeastBread.csv	CS_P54838	20593000000	19206000000	8079500000	Dihydroxyacetone kinase 1 OS=Saccharomyces cerevisiae (strain ATCC 204508 / S288c) OX=559292 GN=DAK1 PE=1 SV=1
PlainYeastBread.csv	WHT_A0A3B6TLX7	15131000000	28269000000	9199600000	Alpha/beta hydrolase fold-3 domain-containing protein OS=Triticum aestivum OX=4565 GN=CFC21_108142 PE=4 SV=1
PlainYeastBread.csv	WHT_A0A3B6RBU0	9699500000	37763000000	15829000000	FAD/NAD(P)-binding domain-containing protein OS=Triticum aestivum OX=4565 GN=CFC21_096733 PE=4 SV=1
PlainYeastBread.csv	CS_P32891	15172000000	30143000000	35756000000	D-lactate dehydrogenase [cytochrome] 1 mitochondrial OS=Saccharomyces cerevisiae (strain ATCC 204508 / S288c) OX=559292 GN=DLD1 PE=1 SV=2
PlainYeastBread.csv	WHT_A0A3B6C2X6	783770000	0	6218700000	40S ribosomal protein S3 OS=Triticum aestivum OX=4565 PE=3 SV=1
PlainYeastBread.csv	WHT_A0A3B6JHG6	6959900000	19606000000	9647500000	Protein transport protein Sec24-like CEF OS=Triticum aestivum OX=4565 GN=CFC21_061003 PE=3 SV=1
PlainYeastBread.csv	WHT_A0A3B6C7S5	1606000000	36252000000	3773600000	NADH:flavin oxidoreductase/NADH oxidase N-terminal domain-containing protein OS=Triticum aestivum OX=4565 GN=CFC21_023868 PE=3 SV=1
PlainYeastBread.csv	BRL_A0A8I6W8C2	1563800000	30881000000	8937900000	Eukaryotic translation initiation factor 3 subunit D OS=Hordeum vulgare subsp. vulgare OX=112509 PE=3 SV=1
PlainYeastBread.csv	CS_P42222	1440000000	330150000000	168680000000	Enolase-related protein 3 OS=Saccharomyces cerevisiae (strain ATCC 204508 / S288c) OX=559292 GN=ERR3 PE=3 SV=2
PlainYeastBread.csv	WHT_A0A3B6B3Z1	39507000000	61923000000	31861000000	26S proteasome non-ATPase regulatory subunit 1 homolog OS=Triticum aestivum OX=4565 GN=CFC21_018664 PE=3 SV=1
PlainYeastBread.csv	CS_P40054	4222100000	20862000000	15199000000	D-3-phosphoglycerate dehydrogenase 1 OS=Saccharomyces cerevisiae (strain ATCC 204508 / S288c) OX=559292 GN=SER3 PE=1 SV=1
PlainYeastBread.csv	WHT_A0A3B5Z2A1	6751700000	1305000000	11956000000	Hyaluronan/mRNA-binding protein domain-containing protein OS=Triticum aestivum OX=4565 GN=CFC21_008402 PE=4 SV=1
PlainYeastBread.csv	WHT_A0A3B6IX92	120550000000	17290000000	79447000000	Acireductone dioxygenase OS=Triticum aestivum OX=4565 PE=3 SV=1
PlainYeastBread.csv	BRL_F2E396	120550000000	17290000000	77201000000	Acireductone dioxygenase OS=Hordeum vulgare subsp. vulgare OX=112509 PE=2 SV=1
PlainYeastBread.csv	BRL_F2DWS1	23382000000	28812000000	11603000000	Proliferating cell nuclear antigen OS=Hordeum vulgare subsp. vulgare OX=112509 PE=2 SV=1
PlainYeastBread.csv	WHT_G0Z6F1	11625000000	16661000000	13103000000	26s proteasome non-ATPase regulatory subunit OS=Triticum aestivum OX=4565 GN=CFC21_041054 PE=2 SV=1
PlainYeastBread.csv	WHT_A0A3B6LYU2	13568000000	15809000000	23701000000	Pectinesterase inhibitor domain-containing protein OS=Triticum aestivum OX=4565 GN=CFC21_075178 PE=4 SV=1
PlainYeastBread.csv	CS_Q12329	26418000000	30579000000	16381000000	Heat shock protein 42 OS=Saccharomyces cerevisiae (strain ATCC 204508 / S288c) OX=559292 GN=HSP42 PE=1 SV=1
PlainYeastBread.csv	CS_Q04947	88232000000	120440000000	78147000000	Reticulon-like protein 1 OS=Saccharomyces cerevisiae (strain ATCC 204508 / S288c) OX=559292 GN=RTN1 PE=1 SV=1
PlainYeastBread.csv	BRL_A0A8I6Y4J8	6693400000	16291000000	7232400000	Glutamine synthetase OS=Hordeum vulgare subsp. vulgare OX=112509 PE=3 SV=1
PlainYeastBread.csv	WHT_A0A3B6ED63	2455200000	4241500000	3946400000	Water stress and hypersensitive response domain-containing protein OS=Triticum aestivum OX=4565 GN=CFC21_034764 PE=3 SV=1
PlainYeastBread.csv	WHT_W5HK94	19977000000	6551200000	4230300000	Bifunctional inhibitor/plant lipid transfer protein/seed storage helical domain-containing protein OS=Triticum aestivum OX=4565 GN=CFC21_104751 PE=4 SV=1
PlainYeastBread.csv	BRL_Q8VWW3	483950000000	5655700000	4134700000	glutathione transferase OS=Hordeum vulgare subsp. vulgare OX=112509 GN=GST6 PE=2 SV=1
PlainYeastBread.csv	WHT_A0A3B6PMK1			0	K Homology domain-containing protein OS=Triticum aestivum OX=4565 GN=CFC21_088036 PE=4 SV=1
PlainYeastBread.csv	BRL_F2CRI1	1728900000	29413000000	6293100000	Dihydrolipoyl dehydrogenase OS=Hordeum vulgare subsp. vulgare OX=112509 PE=2 SV=1
PlainYeastBread.csv	WHT_A0A3B6TB39	11214000000	32789000000	6437200000	Sucrose:sucrose 1-fructosyltransferase OS=Triticum aestivum OX=4565 GN=CFC21_106404 PE=3 SV=1
PlainYeastBread.csv	WHT_A0A3B6REZ9	18434000000	29562000000	12073000000	Pyruvate dehydrogenase E1 component subunit beta OS=Triticum aestivum OX=4565 GN=CFC21_097657 PE=4 SV=1
PlainYeastBread.csv	BRL_F2CPR3	18434000000	29562000000	12073000000	Pyruvate dehydrogenase E1 component subunit beta OS=Hordeum vulgare subsp. vulgare OX=112509 PE=2 SV=1
PlainYeastBread.csv	WHT_E2F3W4	139990000000	299690000000	115740000000	Small ribosomal subunit protein uS8c OS=Triticum aestivum OX=4565 GN=CFC21_007684 PE=2 SV=1
PlainYeastBread.csv	SOY_C6F117	139990000000	299690000000	115740000000	Putative ribosomal protein S15 OS=Glycine max OX=3847 GN=100814599 PE=2 SV=1
PlainYeastBread.csv	SOY_K7MAP3	139990000000	299690000000	115740000000	30S ribosomal protein S8 chloroplastic OS=Glycine max OX=3847 GN=GLYMA_15G102600 PE=3 SV=1
PlainYeastBread.csv	CS_P36139	19678000000	1997000000	1641000000	Protein PET10 OS=Saccharomyces cerevisiae (strain ATCC 204508 / S288c) OX=559292 GN=PET10 PE=1 SV=3
PlainYeastBread.csv	BRL_F2DCH1	9747500000	39598000000	8159700000	Predicted protein OS=Hordeum vulgare subsp. vulgare OX=112509 PE=2 SV=1
PlainYeastBread.csv	CS_P49167	71844000000	54963000000	48043000000	Large ribosomal subunit protein eL38 OS=Saccharomyces cerevisiae (strain ATCC 204508 / S288c) OX=559292 GN=RPL38 PE=1 SV=1
PlainYeastBread.csv	WHT_A0A3B6B0J6	714610000	7989800000	11641000000	UBX domain-containing protein OS=Triticum aestivum OX=4565 GN=CFC21_017721 PE=4 SV=1
PlainYeastBread.csv	CS_P39692	13588000000	20323000000	9264800000	Sulfite reductase [NADPH] flavoprotein component OS=Saccharomyces cerevisiae (strain ATCC 204508 / S288c) OX=559292 GN=MET10 PE=1 SV=2
PlainYeastBread.csv	WHT_A0A3B6SHJ3	186170000000	21850000000	119110000000	60S acidic ribosomal protein P3 OS=Triticum aestivum OX=4565 GN=CFC21_104320 PE=3 SV=1
PlainYeastBread.csv	WHT_A0A3B6CFG7			688760000	Plant antimicrobial peptide domain-containing protein OS=Triticum aestivum OX=4565 GN=CFC21_026162 PE=4 SV=1
PlainYeastBread.csv	WHT_A0A3B6QBJ3	0	141720000000	6021100000	Acetyltransferase component of pyruvate dehydrogenase complex OS=Triticum aestivum OX=4565 PE=3 SV=1
PlainYeastBread.csv	BRL_F2DA22	22843000000	44685000000	13271000000	Predicted protein OS=Hordeum vulgare subsp. vulgare OX=112509 PE=2 SV=1
PlainYeastBread.csv	WHT_A0A3B6KQN0	22843000000	44685000000	13271000000	Uncharacterized protein OS=Triticum aestivum OX=4565 GN=CFC21_068063 PE=3 SV=1
PlainYeastBread.csv	CS_P40825	624600000	16711000000	2531900000	Alanine--tRNA ligase mitochondrial OS=Saccharomyces cerevisiae (strain ATCC 204508 / S288c) OX=559292 GN=ALA1 PE=1 SV=3
PlainYeastBread.csv	CS_P16387	24967000000	36038000000	14377000000	Pyruvate dehydrogenase E1 component subunit alpha mitochondrial OS=Saccharomyces cerevisiae (strain ATCC 204508 / S288c) OX=559292 GN=PDA1 PE=1 SV=2
PlainYeastBread.csv	CS_P0CX51	128980000000	115040000000	72535000000	Small ribosomal subunit protein uS9A OS=Saccharomyces cerevisiae (strain ATCC 204508 / S288c) OX=559292 GN=RPS16A PE=1 SV=1
PlainYeastBread.csv	WHT_A0A3B6AYE9	8180700000	14479000000	2669800000	Uncharacterized protein OS=Triticum aestivum OX=4565 GN=CFC21_017136 PE=4 SV=1
PlainYeastBread.csv	BRL_A0A8I6WL52	8180700000	14479000000	2669800000	Uncharacterized protein OS=Hordeum vulgare subsp. vulgare OX=112509 PE=4 SV=1
PlainYeastBread.csv	WHT_A0A3B6KT79	0	3267800000		Aconitate hydratase OS=Triticum aestivum OX=4565 GN=CFC21_068869 PE=3 SV=1
PlainYeastBread.csv	BRL_A0A8I6XKV8	0	3267800000		Aconitate hydratase OS=Hordeum vulgare subsp. vulgare OX=112509 PE=3 SV=1
PlainYeastBread.csv	WHT_A0A3B6D5E7	29679000000	15496000000	22015000000	GH18 domain-containing protein OS=Triticum aestivum OX=4565 GN=CFC21_027553 PE=4 SV=1
PlainYeastBread.csv	WHT_A0A3B6AWP5	18983000000	31625000000	1533000000	UspA domain-containing protein OS=Triticum aestivum OX=4565 GN=CFC21_016442 PE=4 SV=1
PlainYeastBread.csv	WHT_W5CDW4	357920000000	248350000000	103220000000	TRASH domain-containing protein OS=Triticum aestivum OX=4565 GN=CFC21_042648 PE=3 SV=1
PlainYeastBread.csv	WHT_W5CTA6	45639000000	21353000000	1909000000	Knottin scorpion toxin-like domain-containing protein OS=Triticum aestivum OX=4565 GN=CFC21_043675 PE=3 SV=1
PlainYeastBread.csv	WHT_A0A3B6RJ96	12124000000	5016800000	7091500000	RRM domain-containing protein OS=Triticum aestivum OX=4565 GN=CFC21_097893 PE=4 SV=1
PlainYeastBread.csv	WHT_A0A3B6ISZ4	11438000000	12562000000	1009000000	VWFA domain-containing protein OS=Triticum aestivum OX=4565 GN=CFC21_058254 PE=3 SV=1
PlainYeastBread.csv	WHT_A0A3B5Z0M5	25533000000	189190000000	55273000000	Bowman-Birk serine protease inhibitors family domain-containing protein OS=Triticum aestivum OX=4565 GN=CFC21_007489 PE=4 SV=1
PlainYeastBread.csv	CS_P09457	1218000000	0	12708000000	ATP synthase subunit 5 mitochondrial OS=Saccharomyces cerevisiae (strain ATCC 204508 / S288c) OX=559292 GN=ATP5 PE=1 SV=1
PlainYeastBread.csv	WHT_A0A3B6GVH3	2895300000	563030000		Glutaredoxin-dependent peroxiredoxin OS=Triticum aestivum OX=4565 GN=CFC21_047866 PE=3 SV=1
PlainYeastBread.csv	WHT_A0A1D5UZ29	1427800000	29808000000	7705900000	Genome assembly chromosome: II OS=Triticum aestivum OX=4565 GN=CAMPLR22A2D_LOCUS123 PE=3 SV=1
PlainYeastBread.csv	WHT_A0A3B6RDL4	4989900000	5002800000	3992100000	Damage-control phosphatase ARMT1-like metal-binding domain-containing protein OS=Triticum aestivum OX=4565 GN=CFC21_097289 PE=4 SV=1
PlainYeastBread.csv	BRL_A0A8I6YLH5	4989900000	5002800000	3992100000	Damage-control phosphatase ARMT1-like metal-binding domain-containing protein OS=Hordeum vulgare subsp. vulgare OX=112509 PE=4 SV=1
PlainYeastBread.csv	WHT_A0A3B6NTY7	0	10975000000	4699600000	Pyrophosphate--fructose 6-phosphate 1-phosphotransferase subunit alpha OS=Triticum aestivum OX=4565 GN=PFP-ALPHA PE=3 SV=1
PlainYeastBread.csv	WHT_A0A3B6PQZ6	0	10975000000	4699600000	Pyrophosphate--fructose 6-phosphate 1-phosphotransferase subunit alpha OS=Triticum aestivum OX=4565 GN=PFP-ALPHA PE=3 SV=1
PlainYeastBread.csv	BRL_F2DCT3	0	10975000000	4699600000	Pyrophosphate--fructose 6-phosphate 1-phosphotransferase subunit alpha OS=Hordeum vulgare subsp. vulgare OX=112509 GN=PFP-ALPHA PE=2 SV=1
PlainYeastBread.csv	WHT_A0A3B6NSG2	11198000000	24912000000	8920100000	Glutathione peroxidase OS=Triticum aestivum OX=4565 PE=3 SV=1
PlainYeastBread.csv	WHT_A0A3B6GPT7	0	13938000000	2650300000	valine--tRNA ligase OS=Triticum aestivum OX=4565 PE=3 SV=1
PlainYeastBread.csv	WHT_A0A3B6RJZ6	18946000000	2683300000	9420200000	MSP domain-containing protein OS=Triticum aestivum OX=4565 PE=3 SV=1
PlainYeastBread.csv	BRL_F2DF14	574900000	1876000000	7276800000	Signal recognition particle subunit SRP72 OS=Hordeum vulgare subsp. vulgare OX=112509 PE=2 SV=1
PlainYeastBread.csv	WHT_A0A3B6H2V7	574900000	1876000000	7276800000	Signal recognition particle subunit SRP72 OS=Triticum aestivum OX=4565 PE=3 SV=1
PlainYeastBread.csv	CS_Q05911	1588000000	33264000000	4636200000	Adenylosuccinate lyase OS=Saccharomyces cerevisiae (strain ATCC 204508 / S288c) OX=559292 GN=ADE13 PE=1 SV=1
PlainYeastBread.csv	CS_P53912	1268000000	16561000000	8299800000	Uncharacterized protein YNL134C OS=Saccharomyces cerevisiae (strain ATCC 204508 / S288c) OX=559292 GN=YNL134C PE=1 SV=1
PlainYeastBread.csv	BRL_F2DBD5	15002000000	12551000000	10397000000	NAD(P)H dehydrogenase (quinone) OS=Hordeum vulgare subsp. vulgare OX=112509 PE=2 SV=1
PlainYeastBread.csv	WHT_A0A3B6SPW3	1567300000	5279600000	724210000	Translocon-associated protein subunit alpha OS=Triticum aestivum OX=4565 GN=CFC21_104030 PE=3 SV=1
PlainYeastBread.csv	BRL_F2CQ15	1567300000	5279600000	724210000	Translocon-associated protein subunit alpha OS=Hordeum vulgare subsp. vulgare OX=112509 PE=2 SV=1
PlainYeastBread.csv	WHT_A0A3B6AXS6	2124400000	15175000000	0	Ribosomal protein L13a OS=Triticum aestivum OX=4565 PE=3 SV=1
PlainYeastBread.csv	WHT_A0A341UET3	70351000000	135320000000	88736000000	40S ribosomal protein S27 OS=Triticum aestivum OX=4565 GN=CFC21_053114 PE=3 SV=1
PlainYeastBread.csv	WHT_A0A3B6JPS0	3576100000	7467900000	1855300000	Phytoene dehydrogenase OS=Triticum aestivum OX=4565 GN=CFC21_063026 PE=3 SV=1
PlainYeastBread.csv	WHT_A0A077RUM9	12854000000	5061500000	8721800000	Phytocyanin domain-containing protein OS=Triticum aestivum OX=4565 GN=CFC21_042003 PE=3 SV=1
PlainYeastBread.csv	WHT_A0A3B6SG63	10932000000	29797000000	5314600000	STI1/HOP DP domain-containing protein OS=Triticum aestivum OX=4565 GN=CFC21_102667 PE=4 SV=1
PlainYeastBread.csv	WHT_A0A3B6H6X9	191000000	24145000000	15985000000	NAD-dependent epimerase/dehydratase domain-containing protein OS=Triticum aestivum OX=4565 GN=CFC21_050610 PE=4 SV=1
PlainYeastBread.csv	BRL_F2CXY7	191000000	24145000000	15985000000	Predicted protein OS=Hordeum vulgare subsp. vulgare OX=112509 PE=2 SV=1
PlainYeastBread.csv	CS_P17967	11936000000	3191300000	8740700000	Protein disulfide-isomerase OS=Saccharomyces cerevisiae (strain ATCC 204508 / S288c) OX=559292 GN=PDI1 PE=1 SV=2
PlainYeastBread.csv	SOY_I1MC31	0		0	Histidine kinase/HSP90-like ATPase domain-containing protein OS=Glycine max OX=3847 GN=100779976 PE=3 SV=1
PlainYeastBread.csv	WHT_A0A3B6NSX6	14721000000	18409000000	13743000000	Uncharacterized protein OS=Triticum aestivum OX=4565 GN=CFC21_083911 PE=3 SV=1
PlainYeastBread.csv	CS_P0CX30	26034000000	3957100000	21811000000	Small ribosomal subunit protein uS12B OS=Saccharomyces cerevisiae (strain ATCC 204508 / S288c) OX=559292 GN=RPS23B PE=1 SV=1
PlainYeastBread.csv	BRL_F2CWL4	2589200000	7623500000	1820800000	Trehalose 6-phosphate phosphatase OS=Hordeum vulgare subsp. vulgare OX=112509 PE=2 SV=1
PlainYeastBread.csv	BRL_F2D4W1	43958000000	5809000000	24713000000	Peptidyl-prolyl cis-trans isomerase OS=Hordeum vulgare subsp. vulgare OX=112509 PE=2 SV=1
PlainYeastBread.csv	BRL_A0A8I6WSK3	44632000000	111320000000	33963000000	Glutaredoxin-dependent peroxiredoxin OS=Hordeum vulgare subsp. vulgare OX=112509 PE=3 SV=1
PlainYeastBread.csv	WHT_A0A3B6PR34		856840000	70160000	Lipocalin/cytosolic fatty-acid binding domain-containing protein OS=Triticum aestivum OX=4565 GN=CFC21_089400 PE=3 SV=1
PlainYeastBread.csv	WHT_A0A3B6J040	0	0		Uncharacterized protein OS=Triticum aestivum OX=4565 GN=CFC21_059904 PE=4 SV=1
PlainYeastBread.csv	BRL_F2CTX3	11774000000	28344000000	15019000000	Predicted protein OS=Hordeum vulgare subsp. vulgare OX=112509 PE=2 SV=1
PlainYeastBread.csv	WHT_A0A3B5ZWI4		0	82982000000	Uncharacterized protein OS=Triticum aestivum OX=4565 GN=CFC21_011979 PE=3 SV=1
PlainYeastBread.csv	CS_P53090	6753800000	24083000000	14678000000	Aromatic/aminoadipate aminotransferase 1 OS=Saccharomyces cerevisiae (strain ATCC 204508 / S288c) OX=559292 GN=ARO8 PE=1 SV=1
PlainYeastBread.csv	CS_Q05016	69217000000	3293500000	2530300000	NADP-dependent 3-hydroxy acid dehydrogenase OS=Saccharomyces cerevisiae (strain ATCC 204508 / S288c) OX=559292 GN=YMR226C PE=1 SV=1
PlainYeastBread.csv	CS_P27796	210700000	9535700000	1972200000	3-ketoacyl-CoA thiolase peroxisomal OS=Saccharomyces cerevisiae (strain ATCC 204508 / S288c) OX=559292 GN=POT1 PE=1 SV=1
PlainYeastBread.csv	WHT_A0A3B6TEW5	10598000000	25577000000	0	Pullulanase OS=Triticum aestivum OX=4565 GN=CFC21_107719 PE=4 SV=1
PlainYeastBread.csv	CS_P38711	253790000000	259910000000	173010000000	Small ribosomal subunit protein eS27B OS=Saccharomyces cerevisiae (strain ATCC 204508 / S288c) OX=559292 GN=RPS27B PE=1 SV=1
PlainYeastBread.csv	BRL_A0A8I7BCD5	118300000	3799100000	1968200000	NADH dehydrogenase [ubiquinone] 1 alpha subcomplex subunit 5 mitochondrial OS=Hordeum vulgare subsp. vulgare OX=112509 PE=3 SV=1
PlainYeastBread.csv	WHT_A0A3B6GS44	9839600000	8101500000	0	Uncharacterized protein OS=Triticum aestivum OX=4565 GN=CFC21_046359 PE=4 SV=1
PlainYeastBread.csv	BRL_F2DA67	1288000000	19429000000	9960700000	peptidylprolyl isomerase OS=Hordeum vulgare subsp. vulgare OX=112509 PE=2 SV=1
PlainYeastBread.csv	WHT_W5FTF6	5218800000	3728000000	15941000000	UBC core domain-containing protein OS=Triticum aestivum OX=4565 GN=CFC21_077263 PE=4 SV=1
PlainYeastBread.csv	BRL_A0A8I6XRH2	5218800000	3728000000	15941000000	UBC core domain-containing protein OS=Hordeum vulgare subsp. vulgare OX=112509 PE=4 SV=1
PlainYeastBread.csv	BRL_F2DC74	12834000000	14002000000	3211400000	Predicted protein OS=Hordeum vulgare subsp. vulgare OX=112509 PE=2 SV=1
PlainYeastBread.csv	WHT_W5HZE9	12834000000	14002000000	3211400000	AAA+ ATPase domain-containing protein OS=Triticum aestivum OX=4565 GN=CFC21_098793 PE=3 SV=1
PlainYeastBread.csv	BRL_F2DYJ0	0	28891000000	20355000000	Proteasome subunit alpha type OS=Hordeum vulgare subsp. vulgare OX=112509 PE=2 SV=1
PlainYeastBread.csv	WHT_A0A3B6TTK4	17892000000	24343000000	11596000000	Abscisic acid receptor 9 OS=Triticum aestivum OX=4565 GN=CFC21_109742 PE=2 SV=1
PlainYeastBread.csv	WHT_A0A3B6TQD5	7810400000	13104000000	2263200000	glutamate-1-semialdehyde 2 1-aminomutase OS=Triticum aestivum OX=4565 GN=CFC21_109044 PE=3 SV=1
PlainYeastBread.csv	BRL_A0A8I7BEA4	7810400000	10601000000	2263200000	glutamate-1-semialdehyde 2 1-aminomutase OS=Hordeum vulgare subsp. vulgare OX=112509 PE=3 SV=1
PlainYeastBread.csv	CS_P29509	1802900000	8766800000	197600000	Thioredoxin reductase 1 OS=Saccharomyces cerevisiae (strain ATCC 204508 / S288c) OX=559292 GN=TRR1 PE=1 SV=3
PlainYeastBread.csv	WHT_A0A3B6C4X7	5177600000	11554000000	1514100000	Phospho-2-dehydro-3-deoxyheptonate aldolase OS=Triticum aestivum OX=4565 GN=CFC21_022414 PE=3 SV=1
PlainYeastBread.csv	CS_P00424	30017000000	70551000000	30641000000	Cytochrome c oxidase subunit 5A mitochondrial OS=Saccharomyces cerevisiae (strain ATCC 204508 / S288c) OX=559292 GN=COX5A PE=1 SV=1
PlainYeastBread.csv	BRL_M0XEJ4	6823100000	12989000000	3458300000	Uncharacterized protein OS=Hordeum vulgare subsp. vulgare OX=112509 PE=4 SV=1
PlainYeastBread.csv	WHT_A0A3B5YY59	6823100000	12989000000	3458300000	Importin N-terminal domain-containing protein OS=Triticum aestivum OX=4565 GN=CFC21_007057 PE=4 SV=1
PlainYeastBread.csv	BRL_F2CZT5	2152300000	9623300000	2729300000	Predicted protein OS=Hordeum vulgare subsp. vulgare OX=112509 PE=2 SV=1
PlainYeastBread.csv	WHT_A0A3B6PL34	2152300000	9623300000	2729300000	Uncharacterized protein OS=Triticum aestivum OX=4565 GN=CFC21_087642 PE=4 SV=1
PlainYeastBread.csv	WHT_A0A3B6NNA4	2152300000	9623300000	2729300000	Glyoxylate/succinic semialdehyde reductase 1 OS=Triticum aestivum OX=4565 PE=4 SV=1
PlainYeastBread.csv	WHT_A0A3B5YWS1	9267900000	7303700000	199100000	Nascent polypeptide-associated complex subunit beta OS=Triticum aestivum OX=4565 GN=CFC21_006460 PE=3 SV=1
PlainYeastBread.csv	WHT_A0A3B5XYH4	9267900000	7303700000	199100000	Nascent polypeptide-associated complex subunit beta OS=Triticum aestivum OX=4565 PE=3 SV=1
PlainYeastBread.csv	BRL_A0A8I6WHE1	9267900000	7303700000	199100000	Nascent polypeptide-associated complex subunit beta OS=Hordeum vulgare subsp. vulgare OX=112509 PE=3 SV=1
PlainYeastBread.csv	WHT_A0A3B6GQ71	9262400000	7517700000	5922200000	Cysteine proteinase inhibitor OS=Triticum aestivum OX=4565 GN=CFC21_047014 PE=3 SV=1
PlainYeastBread.csv	WHT_A0A3B6RFY8	18187000000	27104000000	15847000000	60S ribosomal protein L34 OS=Triticum aestivum OX=4565 GN=CFC21_098055 PE=3 SV=1
PlainYeastBread.csv	CS_P53163	9984100000	8619800000	10565000000	Large ribosomal subunit protein bL12m OS=Saccharomyces cerevisiae (strain ATCC 204508 / S288c) OX=559292 GN=MNP1 PE=1 SV=1
PlainYeastBread.csv	WHT_A0A3B6IY47	4114000000	35942000000	2527000000	Enoyl reductase (ER) domain-containing protein OS=Triticum aestivum OX=4565 GN=CFC21_059012 PE=3 SV=1
PlainYeastBread.csv	WHT_A0A3B5ZS09	1977400000	0	528210000	RRM domain-containing protein OS=Triticum aestivum OX=4565 GN=CFC21_006383 PE=4 SV=1
PlainYeastBread.csv	WHT_A0A3B5Z2H6	46704000000	22051000000	10632000000	Phytocyanin domain-containing protein OS=Triticum aestivum OX=4565 PE=3 SV=1
PlainYeastBread.csv	CS_P21954	21389000000	27303000000	0	Isocitrate dehydrogenase [NADP] mitochondrial OS=Saccharomyces cerevisiae (strain ATCC 204508 / S288c) OX=559292 GN=IDP1 PE=1 SV=1
PlainYeastBread.csv	WHT_A0A3B6MKW7	2018600000	1611600000	205120000	Importin N-terminal domain-containing protein OS=Triticum aestivum OX=4565 GN=CFC21_076325 PE=4 SV=1
PlainYeastBread.csv	WHT_Q35980	10805000000	837900000	207300000	30 kDa subunit of complex I NADH dehydrogenase OS=Triticum aestivum OX=4565 GN=nad9 PE=3 SV=1
PlainYeastBread.csv	BRL_M0Z344	10805000000	837900000	207300000	NADH dehydrogenase subunit 9 OS=Hordeum vulgare subsp. vulgare OX=112509 GN=nad9_2 PE=3 SV=1
PlainYeastBread.csv	CS_P40159	37155000000	17561000000	17349000000	Uncharacterized protein YNL208W OS=Saccharomyces cerevisiae (strain ATCC 204508 / S288c) OX=559292 GN=YNL208W PE=1 SV=2
PlainYeastBread.csv	BRL_A0A8I6XUF2		205390000		Pyruvate dehydrogenase E1 component subunit beta OS=Hordeum vulgare subsp. vulgare OX=112509 PE=4 SV=1
PlainYeastBread.csv	WHT_A0A3B6KJM3		205390000		Pyruvate dehydrogenase E1 component subunit beta OS=Triticum aestivum OX=4565 GN=CFC21_066655 PE=4 SV=1
PlainYeastBread.csv	WHT_A0A3B6LY08	42581000000	68787000000	32797000000	Water stress and hypersensitive response domain-containing protein OS=Triticum aestivum OX=4565 PE=3 SV=1
PlainYeastBread.csv	WHT_A0A3B6R922	75600000	14874000000	5160400000	Nucleosome assembly protein OS=Triticum aestivum OX=4565 GN=CFC21_095993 PE=3 SV=1
PlainYeastBread.csv	WHT_A0A3B6N140	9750200000	20648000000	12889000000	Alpha-mannosidase OS=Triticum aestivum OX=4565 GN=CFC21_078299 PE=3 SV=1
PlainYeastBread.csv	BRL_F2DYD4	0	9403400000	8395600000	Predicted protein OS=Hordeum vulgare subsp. vulgare OX=112509 PE=2 SV=1
PlainYeastBread.csv	WHT_A0A3B6GRT1	0	9403400000	8395600000	GTP-binding protein SAR1A OS=Triticum aestivum OX=4565 GN=CFC21_046895 PE=3 SV=1
PlainYeastBread.csv	BRL_A0A8I7BEF2	10876000000	26331000000	830200000	dihydroxy-acid dehydratase OS=Hordeum vulgare subsp. vulgare OX=112509 PE=3 SV=1
PlainYeastBread.csv	WHT_A0A3B6TJJ8	10876000000	26331000000	830200000	dihydroxy-acid dehydratase OS=Triticum aestivum OX=4565 GN=CFC21_109219 PE=3 SV=1
PlainYeastBread.csv	WHT_A0A3B6C6P1	13183000000	9561400000	2087800000	Uncharacterized protein OS=Triticum aestivum OX=4565 GN=CFC21_023613 PE=3 SV=1
PlainYeastBread.csv	WHT_A0A3B6HYW3	8048500000	3008200000		Nascent polypeptide-associated complex subunit beta OS=Triticum aestivum OX=4565 PE=3 SV=1
PlainYeastBread.csv	BRL_F2CPS5	8048500000	3008200000		Nascent polypeptide-associated complex subunit beta OS=Hordeum vulgare subsp. vulgare OX=112509 PE=2 SV=1
PlainYeastBread.csv	CS_P40495	20314000000	45307000000	19552000000	Homoisocitrate dehydrogenase mitochondrial OS=Saccharomyces cerevisiae (strain ATCC 204508 / S288c) OX=559292 GN=LYS12 PE=1 SV=1
PlainYeastBread.csv	WHT_A0A3B6NVU6	3822400000	10656000000	4015900000	Aspartate aminotransferase OS=Triticum aestivum OX=4565 GN=CFC21_085027 PE=3 SV=1
PlainYeastBread.csv	WHT_A0A3B6QJQ3	3822400000	10656000000	4015900000	Aspartate aminotransferase OS=Triticum aestivum OX=4565 GN=CFC21_099260 PE=3 SV=1
PlainYeastBread.csv	BRL_A0A8I6Z4E9	3822400000	10656000000	4015900000	Aspartate aminotransferase OS=Hordeum vulgare subsp. vulgare OX=112509 PE=3 SV=1
PlainYeastBread.csv	WHT_A0A3B6H468	30747000000	1435000000	13856000000	Knottin scorpion toxin-like domain-containing protein OS=Triticum aestivum OX=4565 GN=CFC21_049564 PE=3 SV=1
PlainYeastBread.csv	WHT_A0A3B6QHG3	4588600000	5877100000	2783900000	Elongation factor Tu OS=Triticum aestivum OX=4565 GN=CFC21_092695 PE=3 SV=1
PlainYeastBread.csv	BRL_A0A8I6XUG0	4588600000	5877100000	2783900000	Elongation factor Tu OS=Hordeum vulgare subsp. vulgare OX=112509 PE=3 SV=1
PlainYeastBread.csv	CS_P40215	19408000000	19518000000	9203900000	External NADH-ubiquinone oxidoreductase 1 mitochondrial OS=Saccharomyces cerevisiae (strain ATCC 204508 / S288c) OX=559292 GN=NDE1 PE=1 SV=1
PlainYeastBread.csv	CS_P07213	5496700000	14733000000	273100000	Mitochondrial import receptor subunit TOM70 OS=Saccharomyces cerevisiae (strain ATCC 204508 / S288c) OX=559292 GN=TOM70 PE=1 SV=2
PlainYeastBread.csv	WHT_A0A3B5Y316	674710000000	104480000000	11140000000	Non-specific lipid-transfer protein OS=Triticum aestivum OX=4565 PE=3 SV=1
PlainYeastBread.csv	CS_P14020	6593300000	32096000000	19192000000	Dolichol-phosphate mannosyltransferase OS=Saccharomyces cerevisiae (strain ATCC 204508 / S288c) OX=559292 GN=DPM1 PE=1 SV=3
PlainYeastBread.csv	WHT_A0A3B6TIR3	208900000	6926800000	3439400000	60S ribosomal protein L32 OS=Triticum aestivum OX=4565 GN=CFC21_109000 PE=3 SV=1
PlainYeastBread.csv	WHT_A0A3B6SFT5	208900000	6926800000	3439400000	60S ribosomal protein L32 OS=Triticum aestivum OX=4565 PE=3 SV=1
PlainYeastBread.csv	WHT_A0A3B6TQ56	208900000	6926800000	3439400000	60S ribosomal protein L32 OS=Triticum aestivum OX=4565 GN=CFC21_108970 PE=3 SV=1
PlainYeastBread.csv	WHT_A0A3B6RER4	208900000	6926800000	3439400000	60S ribosomal protein L32 OS=Triticum aestivum OX=4565 PE=3 SV=1
PlainYeastBread.csv	CS_Q00955	9515400000	23312000000	9072400000	Acetyl-CoA carboxylase OS=Saccharomyces cerevisiae (strain ATCC 204508 / S288c) OX=559292 GN=ACC1 PE=1 SV=2
PlainYeastBread.csv	BRL_F2DVK7	11653000000	21589000000	8744100000	Predicted protein OS=Hordeum vulgare subsp. vulgare OX=112509 PE=2 SV=1
PlainYeastBread.csv	WHT_A0A3B5Y5G6	11653000000	21589000000	8744100000	Nucleosome assembly protein OS=Triticum aestivum OX=4565 PE=3 SV=1
PlainYeastBread.csv	WHT_A0A3B6CEG2	10053000000	18325000000	20136000000	UspA domain-containing protein OS=Triticum aestivum OX=4565 GN=CFC21_025883 PE=4 SV=1
PlainYeastBread.csv	BRL_A0A8I6YLX1	5020700000	12791000000	4817600000	Citrate synthase OS=Hordeum vulgare subsp. vulgare OX=112509 PE=3 SV=1
PlainYeastBread.csv	WHT_A0A3B6KQ76	5020700000	12791000000	4817600000	Citrate synthase OS=Triticum aestivum OX=4565 GN=CFC21_067930 PE=3 SV=1
PlainYeastBread.csv	WHT_A0A3B6EFA6	7182600000	5362700000	3885200000	Transcription initiation factor TFIID subunit 15b OS=Triticum aestivum OX=4565 GN=CFC21_034254 PE=4 SV=1
PlainYeastBread.csv	CS_P40525	99481000000	110370000000	74065000000	Large ribosomal subunit protein eL34B OS=Saccharomyces cerevisiae (strain ATCC 204508 / S288c) OX=559292 GN=RPL34B PE=1 SV=1
PlainYeastBread.csv	BRL_F2E6Z7	4992700000	13269000000	3948400000	AMP deaminase OS=Hordeum vulgare subsp. vulgare OX=112509 PE=2 SV=1
PlainYeastBread.csv	WHT_A0A3B5ZVC8	4992700000	13269000000	3948400000	AMP deaminase OS=Triticum aestivum OX=4565 GN=CFC21_011987 PE=3 SV=1
PlainYeastBread.csv	CS_P17536	3436500000	22593000000	12989000000	Tropomyosin-1 OS=Saccharomyces cerevisiae (strain ATCC 204508 / S288c) OX=559292 GN=TPM1 PE=1 SV=1
PlainYeastBread.csv	SOY_I1MKC8	209730000000	22575000000	5819800000	Starch synthase chloroplastic/amyloplastic OS=Glycine max OX=3847 GN=100817424 PE=3 SV=1
PlainYeastBread.csv	CS_P51401	66759000000	75621000000	58571000000	Large ribosomal subunit protein uL6B OS=Saccharomyces cerevisiae (strain ATCC 204508 / S288c) OX=559292 GN=RPL9B PE=1 SV=1
PlainYeastBread.csv	CS_P07283	13456000000	32436000000	18388000000	Phosphomannomutase OS=Saccharomyces cerevisiae (strain ATCC 204508 / S288c) OX=559292 GN=SEC53 PE=1 SV=1
PlainYeastBread.csv	CS_P36010	63123000000	65781000000	53582000000	Nucleoside diphosphate kinase OS=Saccharomyces cerevisiae (strain ATCC 204508 / S288c) OX=559292 GN=YNK1 PE=1 SV=1
PlainYeastBread.csv	WHT_A0A3B6PQ92	0	2783200000	1823200000	Mitochondrial import inner membrane translocase subunit OS=Triticum aestivum OX=4565 GN=CFC21_088759 PE=3 SV=1
PlainYeastBread.csv	BRL_M0YI48	0	2783200000	1823200000	Mitochondrial import inner membrane translocase subunit OS=Hordeum vulgare subsp. vulgare OX=112509 PE=3 SV=1
PlainYeastBread.csv	CS_P08417	36703000000	45022000000	26229000000	Fumarate hydratase mitochondrial OS=Saccharomyces cerevisiae (strain ATCC 204508 / S288c) OX=559292 GN=FUM1 PE=1 SV=2
PlainYeastBread.csv	CS_P52910	0	3227800000	0	Acetyl-coenzyme A synthetase 2 OS=Saccharomyces cerevisiae (strain ATCC 204508 / S288c) OX=559292 GN=ACS2 PE=1 SV=1
PlainYeastBread.csv	CS_O13516	97571000000	77422000000	88669000000	Small ribosomal subunit protein uS4A OS=Saccharomyces cerevisiae (strain ATCC 204508 / S288c) OX=559292 GN=RPS9A PE=1 SV=3
PlainYeastBread.csv	BRL_F2DY97		5473800000	10221000000	Predicted protein OS=Hordeum vulgare subsp. vulgare OX=112509 PE=2 SV=1
PlainYeastBread.csv	WHT_A0A3B6ENM3	12483000000	53549000000	23623000000	Small ubiquitin-related modifier OS=Triticum aestivum OX=4565 GN=CFC21_034004 PE=3 SV=1
PlainYeastBread.csv	BRL_F2CW55	12483000000	53549000000	23623000000	Small ubiquitin-related modifier OS=Hordeum vulgare subsp. vulgare OX=112509 PE=2 SV=1
PlainYeastBread.csv	BRL_F2DM63	3274700000	9317500000	3299400000	Predicted protein OS=Hordeum vulgare subsp. vulgare OX=112509 PE=2 SV=1
PlainYeastBread.csv	WHT_A0A3B6EFP0	3274700000	9263300000	3299400000	3'-5' exonuclease domain-containing protein OS=Triticum aestivum OX=4565 GN=CFC21_035334 PE=4 SV=1
PlainYeastBread.csv	WHT_A0A3B5ZQ97	8475500000	2928000000	6784700000	methenyltetrahydrofolate cyclohydrolase OS=Triticum aestivum OX=4565 GN=CFC21_010686 PE=3 SV=1
PlainYeastBread.csv	WHT_A0A3B6T7D3	5532900000	614190000	810130000	Sucrose:fructan 6-fructosyltransferase OS=Triticum aestivum OX=4565 GN=CFC21_106408 PE=3 SV=1
PlainYeastBread.csv	BRL_J7GP58	5532900000	614190000	810130000	Sucrose:fructan 6-fructosyltransferase OS=Hordeum vulgare subsp. vulgare OX=112509 PE=3 SV=1
PlainYeastBread.csv	CS_P43567	3555100000	3240500000	2286400000	Alanine--glyoxylate aminotransferase 1 OS=Saccharomyces cerevisiae (strain ATCC 204508 / S288c) OX=559292 GN=AGX1 PE=1 SV=1
PlainYeastBread.csv	BRL_M0X1N3	4963800000	16696000000	0	Phospholipase D OS=Hordeum vulgare subsp. vulgare OX=112509 PE=3 SV=1
PlainYeastBread.csv	WHT_A0A3B6EEL3	4963800000	16696000000	0	Phospholipase D OS=Triticum aestivum OX=4565 PE=3 SV=1
PlainYeastBread.csv	CS_P40582	2049500000	2866000000	408400000	Glutathione S-transferase 1 OS=Saccharomyces cerevisiae (strain ATCC 204508 / S288c) OX=559292 GN=GTT1 PE=1 SV=1
PlainYeastBread.csv	BRL_F2E3U8	42299000000	29749000000	52229000000	Ribosomal protein OS=Hordeum vulgare subsp. vulgare OX=112509 PE=2 SV=1
PlainYeastBread.csv	WHT_A0A3B6HZM8	42299000000	29749000000	52229000000	Ribosomal protein OS=Triticum aestivum OX=4565 GN=CFC21_053830 PE=3 SV=1
PlainYeastBread.csv	WHT_A0A3B6KIH6	104000000	2005000000	7599100000	Aspartyl aminopeptidase OS=Triticum aestivum OX=4565 GN=CFC21_065843 PE=3 SV=1
PlainYeastBread.csv	CS_P07274	29456000000	30322000000	18053000000	Profilin OS=Saccharomyces cerevisiae (strain ATCC 204508 / S288c) OX=559292 GN=PFY1 PE=1 SV=2
PlainYeastBread.csv	BRL_A0A8I6XLY1	15626000000	27723000000	8511900000	DUF569 domain-containing protein OS=Hordeum vulgare subsp. vulgare OX=112509 PE=4 SV=1
PlainYeastBread.csv	WHT_A0A3B6LVH7	15626000000	27723000000	8511900000	DUF569 domain-containing protein OS=Triticum aestivum OX=4565 GN=CFC21_074111 PE=4 SV=1
PlainYeastBread.csv	CS_P22803	23337000000	57737000000	38229000000	Thioredoxin-2 OS=Saccharomyces cerevisiae (strain ATCC 204508 / S288c) OX=559292 GN=TRX2 PE=1 SV=3
PlainYeastBread.csv	WHT_A0A3B6A134	2013700000	1286600000	9605800000	26S proteasome non-ATPase regulatory subunit 5 OS=Triticum aestivum OX=4565 GN=CFC21_013699 PE=4 SV=1
PlainYeastBread.csv	WHT_A0A3B5ZRK2		0	1134300000	lactoylglutathione lyase OS=Triticum aestivum OX=4565 PE=3 SV=1
PlainYeastBread.csv	BRL_F2DRC5	5961200000	34686000000	0	CCT-beta OS=Hordeum vulgare subsp. vulgare OX=112509 PE=2 SV=1
PlainYeastBread.csv	WHT_A0A3B6LRL0	5961200000	34686000000	0	CCT-beta OS=Triticum aestivum OX=4565 GN=CFC21_073021 PE=3 SV=1
PlainYeastBread.csv	CS_P25349	11583000000	70324000000	29619000000	Flavoprotein-like protein YCP4 OS=Saccharomyces cerevisiae (strain ATCC 204508 / S288c) OX=559292 GN=YCP4 PE=1 SV=1
PlainYeastBread.csv	WHT_A0A3B6QFT2	712700000	7915100000	7669600000	DNA damage-inducible protein 1 OS=Triticum aestivum OX=4565 GN=CFC21_092243 PE=3 SV=1
PlainYeastBread.csv	CS_P39522	6489400000	8137200000	2659300000	Dihydroxy-acid dehydratase mitochondrial OS=Saccharomyces cerevisiae (strain ATCC 204508 / S288c) OX=559292 GN=ILV3 PE=1 SV=2
PlainYeastBread.csv	WHT_P30570	4685700000	54486000000	47875000000	EC protein III OS=Triticum aestivum OX=4565 PE=2 SV=2
PlainYeastBread.csv	WHT_A0A3B6JL41	5547100000	7913600000	6470500000	Phosphoserine aminotransferase OS=Triticum aestivum OX=4565 GN=CFC21_062779 PE=3 SV=1
PlainYeastBread.csv	CS_P00410	1348000000	25861000000	0	Cytochrome c oxidase subunit 2 OS=Saccharomyces cerevisiae (strain ATCC 204508 / S288c) OX=559292 GN=COX2 PE=1 SV=1
PlainYeastBread.csv	BRL_F2CUP5		0	1581300000	Predicted protein OS=Hordeum vulgare subsp. vulgare OX=112509 PE=2 SV=1
PlainYeastBread.csv	BRL_F2DRT8	14844000000	26798000000	11339000000	Predicted protein OS=Hordeum vulgare subsp. vulgare OX=112509 PE=2 SV=1
PlainYeastBread.csv	WHT_A0A3B6C8P3	14844000000	26798000000	11339000000	Eukaryotic translation initiation factor 4B1 OS=Triticum aestivum OX=4565 GN=CFC21_112551 PE=4 SV=1
PlainYeastBread.csv	WHT_A0A3B5Y3S2	6333600000	16628000000	11814000000	acylaminoacyl-peptidase OS=Triticum aestivum OX=4565 PE=3 SV=1
PlainYeastBread.csv	BRL_F2DVI5	3796600000	8392300000	1551300000	aspartate--tRNA ligase OS=Hordeum vulgare subsp. vulgare OX=112509 PE=2 SV=1
PlainYeastBread.csv	WHT_A0A3B6LK94	3796600000	8392300000	1551300000	aspartate--tRNA ligase OS=Triticum aestivum OX=4565 GN=CFC21_071113 PE=3 SV=1
PlainYeastBread.csv	BRL_A0A8I6XS65	2207500000	1816300000		Malate dehydrogenase OS=Hordeum vulgare subsp. vulgare OX=112509 PE=3 SV=1
PlainYeastBread.csv	WHT_A0A3B6TDM1	1213000000	29838000000	5910800000	Ubiquitin-like modifier-activating enzyme 5 OS=Triticum aestivum OX=4565 GN=CFC21_107399 PE=3 SV=1
PlainYeastBread.csv	CS_Q04792	9521100000	14862000000	2624800000	Glutamate decarboxylase OS=Saccharomyces cerevisiae (strain ATCC 204508 / S288c) OX=559292 GN=GAD1 PE=1 SV=1
PlainYeastBread.csv	CS_P38137	0	5319700000	3751300000	Oxalate--CoA ligase OS=Saccharomyces cerevisiae (strain ATCC 204508 / S288c) OX=559292 GN=PCS60 PE=1 SV=1
PlainYeastBread.csv	CS_P38088	11383000000	13019000000	11449000000	Glycine--tRNA ligase 1 mitochondrial OS=Saccharomyces cerevisiae (strain ATCC 204508 / S288c) OX=559292 GN=GRS1 PE=1 SV=3
PlainYeastBread.csv	WHT_A0A3B6SI63	112620000000	99346000000	84742000000	Enoyl reductase (ER) domain-containing protein OS=Triticum aestivum OX=4565 GN=CFC21_103348 PE=4 SV=1
PlainYeastBread.csv	WHT_A0A3B6NPF2	0	9277700000	5187400000	Coatomer subunit beta' OS=Triticum aestivum OX=4565 GN=CFC21_083208 PE=3 SV=1
PlainYeastBread.csv	CS_P48836	18475000000	31799000000	10367000000	V-type proton ATPase subunit G OS=Saccharomyces cerevisiae (strain ATCC 204508 / S288c) OX=559292 GN=VMA10 PE=1 SV=1
PlainYeastBread.csv	CS_P40531	10913000000	15133000000	6828900000	Protein GVP36 OS=Saccharomyces cerevisiae (strain ATCC 204508 / S288c) OX=559292 GN=GVP36 PE=1 SV=1
PlainYeastBread.csv	WHT_A0A3B6EBR2		0	0	pyruvate decarboxylase OS=Triticum aestivum OX=4565 GN=CFC21_034299 PE=3 SV=1
PlainYeastBread.csv	WHT_A0A3B6GS66		0	0	pyruvate decarboxylase OS=Triticum aestivum OX=4565 GN=CFC21_046192 PE=3 SV=1
PlainYeastBread.csv	CS_P31412	6187300000	8415600000	3443700000	V-type proton ATPase subunit C OS=Saccharomyces cerevisiae (strain ATCC 204508 / S288c) OX=559292 GN=VMA5 PE=1 SV=4
PlainYeastBread.csv	SOY_A0A0R0KXC5	4548400000	14457000000	21226000000	ADP-ribosylation factor OS=Glycine max OX=3847 GN=GLYMA_02G009600 PE=3 SV=1
PlainYeastBread.csv	BRL_A0A8I6YDS8	4548400000	14457000000	21226000000	ADP-ribosylation factor OS=Hordeum vulgare subsp. vulgare OX=112509 PE=3 SV=1
PlainYeastBread.csv	SOY_I1J584	4548400000	14457000000	21226000000	ADP-ribosylation factor OS=Glycine max OX=3847 GN=100807631 PE=3 SV=1
PlainYeastBread.csv	WHT_A0A3B6LW43	4548400000	14457000000	21226000000	ADP-ribosylation factor OS=Triticum aestivum OX=4565 GN=CFC21_074351 PE=3 SV=1
PlainYeastBread.csv	WHT_A0A3B6H0W3	4548400000	14457000000	21226000000	ADP-ribosylation factor OS=Triticum aestivum OX=4565 GN=CFC21_048482 PE=3 SV=1
PlainYeastBread.csv	WHT_A0A3B5ZZB3	4548400000	14457000000	21226000000	ADP-ribosylation factor OS=Triticum aestivum OX=4565 GN=CFC21_012799 PE=3 SV=1
PlainYeastBread.csv	CS_Q02642	4373800000	6064300000	3773800000	Nascent polypeptide-associated complex subunit beta-1 OS=Saccharomyces cerevisiae (strain ATCC 204508 / S288c) OX=559292 GN=EGD1 PE=1 SV=2
PlainYeastBread.csv	CS_P07278	42486000000	42104000000	17942000000	cAMP-dependent protein kinase regulatory subunit OS=Saccharomyces cerevisiae (strain ATCC 204508 / S288c) OX=559292 GN=BCY1 PE=1 SV=4
PlainYeastBread.csv	CS_P07806	8225400000	21583000000	0	Valine--tRNA ligase mitochondrial OS=Saccharomyces cerevisiae (strain ATCC 204508 / S288c) OX=559292 GN=VAS1 PE=1 SV=2
PlainYeastBread.csv	WHT_A0A3B6QL85	840830000	4844400000	10203000000	Uncharacterized protein OS=Triticum aestivum OX=4565 GN=CFC21_093717 PE=4 SV=1
PlainYeastBread.csv	WHT_A0A1D5SRX8	84148000000	92759000000	98124000000	60S ribosomal protein L18a OS=Triticum aestivum OX=4565 GN=CFC21_013801 PE=3 SV=1
PlainYeastBread.csv	BRL_F2CVB4	10263000000	17894000000	15629000000	Predicted protein OS=Hordeum vulgare subsp. vulgare OX=112509 PE=2 SV=1
PlainYeastBread.csv	WHT_A0A3B6TQX7	10263000000	17894000000	15629000000	Sulfite oxidase OS=Triticum aestivum OX=4565 GN=CFC21_109033 PE=4 SV=1
PlainYeastBread.csv	CS_Q12672	77676000000	133040000000	8968000000	Large ribosomal subunit protein eL21B OS=Saccharomyces cerevisiae (strain ATCC 204508 / S288c) OX=559292 GN=RPL21B PE=1 SV=1
PlainYeastBread.csv	WHT_A0A3B6B176	1072000000	2628000000	8708700000	MI domain-containing protein OS=Triticum aestivum OX=4565 GN=CFC21_017906 PE=3 SV=1
PlainYeastBread.csv	CS_P32911	32931000000	3531200000	22097000000	Eukaryotic translation initiation factor eIF-1 OS=Saccharomyces cerevisiae (strain ATCC 204508 / S288c) OX=559292 GN=SUI1 PE=1 SV=1
PlainYeastBread.csv	WHT_A0A3B6IZB4	20833000000	51916000000	26103000000	60S ribosomal protein L21 OS=Triticum aestivum OX=4565 GN=CFC21_059387 PE=3 SV=1
PlainYeastBread.csv	CS_P13188	6577200000	15186000000	0	Glutamine--tRNA ligase OS=Saccharomyces cerevisiae (strain ATCC 204508 / S288c) OX=559292 GN=GLN4 PE=1 SV=2
PlainYeastBread.csv	CS_P40510		4196700000	4450500000	D-3-phosphoglycerate dehydrogenase 2 OS=Saccharomyces cerevisiae (strain ATCC 204508 / S288c) OX=559292 GN=SER33 PE=1 SV=1
PlainYeastBread.csv	WHT_A0A3B6KKI2	68309000000	225190000000	95459000000	Uncharacterized protein OS=Triticum aestivum OX=4565 GN=CFC21_066417 PE=4 SV=1
PlainYeastBread.csv	WHT_A0A3B6LMM2	68309000000	225190000000	95459000000	Uncharacterized protein OS=Triticum aestivum OX=4565 GN=CFC21_072222 PE=4 SV=1
PlainYeastBread.csv	WHT_A0A3B6MU19	68309000000	225190000000	95459000000	Uncharacterized protein OS=Triticum aestivum OX=4565 GN=CFC21_078234 PE=4 SV=1
PlainYeastBread.csv	CS_P29952	9342100000	10226000000	252100000	Mannose-6-phosphate isomerase OS=Saccharomyces cerevisiae (strain ATCC 204508 / S288c) OX=559292 GN=PMI40 PE=1 SV=4
PlainYeastBread.csv	BRL_F2DLP7	1009500000	25018000000	13706000000	dihydrolipoyllysine-residue succinyltransferase OS=Hordeum vulgare subsp. vulgare OX=112509 PE=2 SV=1
PlainYeastBread.csv	WHT_A0A3B6JEF0	1009500000	25018000000	13706000000	dihydrolipoyllysine-residue succinyltransferase OS=Triticum aestivum OX=4565 GN=CFC21_060692 PE=3 SV=1
PlainYeastBread.csv	WHT_A0A3B6HTI1	2509300000	13095000000	8520900000	Uncharacterized protein OS=Triticum aestivum OX=4565 GN=CFC21_051558 PE=4 SV=1
PlainYeastBread.csv	BRL_A0A8I6WR46		11868000000	4634300000	GH18 domain-containing protein OS=Hordeum vulgare subsp. vulgare OX=112509 PE=4 SV=1
PlainYeastBread.csv	WHT_A7BJ77		11868000000	4634300000	Xylanase inhibitor OS=Triticum aestivum OX=4565 GN=Xip-R1 PE=2 SV=1
PlainYeastBread.csv	WHT_A0A3B6TPP4	23311000000	28255000000	20716000000	AB hydrolase-1 domain-containing protein OS=Triticum aestivum OX=4565 GN=CFC21_108649 PE=4 SV=1
PlainYeastBread.csv	CS_P38804	7800200000	4492800000	2351200000	Restriction of telomere capping protein 3 OS=Saccharomyces cerevisiae (strain ATCC 204508 / S288c) OX=559292 GN=RTC3 PE=1 SV=1
PlainYeastBread.csv	WHT_A0A3B5Y0F4	0	12896000000	1836600000	Tocopherol cyclase OS=Triticum aestivum OX=4565 PE=4 SV=1
PlainYeastBread.csv	WHT_A0A3B5Z289	14195000000	2075000000	2400400000	Phosphotransferase OS=Triticum aestivum OX=4565 GN=CFC21_008290 PE=3 SV=1
PlainYeastBread.csv	CRAP_CASK	114580000000	3594000000	161380000000	CRAP_CASK_BOVIN
PlainYeastBread.csv	CS_P09938	19295000000	0	12906000000	Ribonucleoside-diphosphate reductase small chain 1 OS=Saccharomyces cerevisiae (strain ATCC 204508 / S288c) OX=559292 GN=RNR2 PE=1 SV=2
PlainYeastBread.csv	CS_Q04344	24594000000	6282700000	8287800000	Adenosine 5'-monophosphoramidase HNT1 OS=Saccharomyces cerevisiae (strain ATCC 204508 / S288c) OX=559292 GN=HNT1 PE=1 SV=2
PlainYeastBread.csv	CS_P29547	6723600000	32919000000	9433400000	Elongation factor 1-gamma 1 OS=Saccharomyces cerevisiae (strain ATCC 204508 / S288c) OX=559292 GN=CAM1 PE=1 SV=2
PlainYeastBread.csv	WHT_A0A3B6MU27	345200000	16684000000	4304900000	Protein transport protein SEC23 OS=Triticum aestivum OX=4565 GN=CFC21_077936 PE=3 SV=1
PlainYeastBread.csv	BRL_M0UG52	345200000	16684000000	4304900000	Protein transport protein SEC23 OS=Hordeum vulgare subsp. vulgare OX=112509 PE=3 SV=1
PlainYeastBread.csv	WHT_A0A3B6KA80	1476500000	0	822710000	Knottin scorpion toxin-like domain-containing protein OS=Triticum aestivum OX=4565 GN=CFC21_064204 PE=4 SV=1
PlainYeastBread.csv	WHT_A0A3B6GPC9	3452200000	205690000000	4035700000	Uncharacterized protein OS=Triticum aestivum OX=4565 GN=CFC21_046238 PE=4 SV=1
PlainYeastBread.csv	WHT_A0A3B6KPZ6	0	3613000000	0	GOLD domain-containing protein OS=Triticum aestivum OX=4565 PE=3 SV=1
PlainYeastBread.csv	WHT_A0A3B6C5F0	7435800000	22835000000	5049600000	CBS domain-containing protein OS=Triticum aestivum OX=4565 GN=CFC21_022574 PE=4 SV=1
PlainYeastBread.csv	BRL_A0A8I6XE69	7435800000	22835000000	5049600000	CBS domain-containing protein OS=Hordeum vulgare subsp. vulgare OX=112509 PE=4 SV=1
PlainYeastBread.csv	WHT_A0A3B6PQJ9	1840700000	1151400000	1720100000	Methyltransferase type 11 domain-containing protein OS=Triticum aestivum OX=4565 PE=3 SV=1
PlainYeastBread.csv	CS_P26784		11283000000	5330100000	Large ribosomal subunit protein uL13A OS=Saccharomyces cerevisiae (strain ATCC 204508 / S288c) OX=559292 GN=RPL16A PE=1 SV=3
PlainYeastBread.csv	SOY_P0DO15	7359100000	21812000000	893900000	Beta-conglycinin alpha subunit 2 OS=Glycine max OX=3847 GN=CG-2 PE=1 SV=1
PlainYeastBread.csv	WHT_A0A3B6IW76	8442800000	14036000000	4227100000	Uncharacterized protein OS=Triticum aestivum OX=4565 GN=CFC21_059190 PE=3 SV=1
PlainYeastBread.csv	WHT_A0A3B6GU50	8442800000	14036000000	4227100000	Uncharacterized protein OS=Triticum aestivum OX=4565 GN=CFC21_046721 PE=3 SV=1
PlainYeastBread.csv	WHT_A0A3B6I1I5	0	0	1286200000	Calreticulin OS=Triticum aestivum OX=4565 GN=CFC21_054409 PE=3 SV=1
PlainYeastBread.csv	BRL_F2DS44	9748600000	8432400000	6967500000	Predicted protein OS=Hordeum vulgare subsp. vulgare OX=112509 PE=2 SV=1
PlainYeastBread.csv	WHT_A0A3B6H276	9748600000	8432400000	6967500000	PX domain-containing protein OS=Triticum aestivum OX=4565 PE=4 SV=1
PlainYeastBread.csv	WHT_A0A3B6EQT5	9748600000	8432400000	6967500000	PX domain-containing protein OS=Triticum aestivum OX=4565 PE=4 SV=1
PlainYeastBread.csv	CS_P05318	6782500000	4655900000	7114200000	Large ribosomal subunit protein P1A OS=Saccharomyces cerevisiae (strain ATCC 204508 / S288c) OX=559292 GN=RPP1A PE=1 SV=4
PlainYeastBread.csv	CS_Q06494	12363000000	20746000000	9082800000	Putative pyridoxal reductase OS=Saccharomyces cerevisiae (strain ATCC 204508 / S288c) OX=559292 GN=YPR127W PE=1 SV=1
PlainYeastBread.csv	WHT_A0A3B5Y8V4	15377000000	18521000000	10324000000	RNA helicase OS=Triticum aestivum OX=4565 PE=4 SV=1
PlainYeastBread.csv	WHT_A0A3B6EHA2	15377000000	18521000000	10324000000	RNA helicase OS=Triticum aestivum OX=4565 GN=CFC21_035250 PE=4 SV=1
PlainYeastBread.csv	BRL_A0A8I6XYL6	15377000000	18521000000	10324000000	DEAD-box ATP-dependent RNA helicase 56 OS=Hordeum vulgare subsp. vulgare OX=112509 PE=4 SV=1
PlainYeastBread.csv	SOY_A0A0R0JKX7	15377000000	18521000000	10324000000	DEAD-box ATP-dependent RNA helicase 56 OS=Glycine max OX=3847 GN=100796232 PE=4 SV=1
PlainYeastBread.csv	WHT_A0A3B6HSK0	765700000	20023000000	5050500000	S1 motif domain-containing protein OS=Triticum aestivum OX=4565 GN=CFC21_051933 PE=3 SV=1
PlainYeastBread.csv	BRL_A0A8I7BBS8	0	0		K Homology domain-containing protein OS=Hordeum vulgare subsp. vulgare OX=112509 PE=4 SV=1
PlainYeastBread.csv	WHT_A0A3B6AUV6	82664000	7969700000	6425500000	Uncharacterized protein OS=Triticum aestivum OX=4565 PE=3 SV=1
PlainYeastBread.csv	BRL_A0A287GCI3	488400000	4806100000	3600000	Uncharacterized protein OS=Hordeum vulgare subsp. vulgare OX=112509 PE=3 SV=1
PlainYeastBread.csv	WHT_A0A3B5ZYY5	488400000	4806100000	3600000	Poly [ADP-ribose] polymerase OS=Triticum aestivum OX=4565 GN=CFC21_013059 PE=3 SV=1
PlainYeastBread.csv	WHT_A0A3B6IW77	0	9059600000	7804800000	Purple acid phosphatase OS=Triticum aestivum OX=4565 GN=CFC21_058443 PE=3 SV=1
PlainYeastBread.csv	WHT_A0A3B6HSU8	0	9059600000	7804800000	Purple acid phosphatase OS=Triticum aestivum OX=4565 PE=3 SV=1
PlainYeastBread.csv	SOY_I1JPW5	0	0	0	phosphopyruvate hydratase OS=Glycine max OX=3847 GN=100811084 PE=3 SV=1
PlainYeastBread.csv	WHT_U5HTF2	1308000000	19744000000		Eukaryotic translation initiation factor 3 subunit G OS=Triticum aestivum OX=4565 GN=eIF3g PE=2 SV=1
PlainYeastBread.csv	BRL_F2DXD4	1308000000	19744000000		Eukaryotic translation initiation factor 3 subunit G OS=Hordeum vulgare subsp. vulgare OX=112509 PE=2 SV=1
PlainYeastBread.csv	BRL_F2E0S1	2932800000	10836000000	1649100000	Guanosine nucleotide diphosphate dissociation inhibitor OS=Hordeum vulgare subsp. vulgare OX=112509 PE=2 SV=1
PlainYeastBread.csv	WHT_A0A3B5ZW21	2932800000	10836000000	1649100000	Guanosine nucleotide diphosphate dissociation inhibitor OS=Triticum aestivum OX=4565 GN=CFC21_012359 PE=3 SV=1
PlainYeastBread.csv	WHT_A0A3B5ZTV5		11366000000	0	BRO1 domain-containing protein OS=Triticum aestivum OX=4565 GN=CFC21_011239 PE=4 SV=1
PlainYeastBread.csv	WHT_A0A3B6G297	4759200000	634900000	4114600000	NAD-dependent epimerase/dehydratase domain-containing protein OS=Triticum aestivum OX=4565 GN=CFC21_044721 PE=4 SV=1
PlainYeastBread.csv	WHT_W5FVL1	12473000000	26448000000	9944100000	60S ribosomal protein L32 OS=Triticum aestivum OX=4565 GN=CFC21_066531 PE=3 SV=1
PlainYeastBread.csv	WHT_A0A3B6LPE1	12473000000	26448000000	8446600000	60S ribosomal protein L32 OS=Triticum aestivum OX=4565 GN=CFC21_072354 PE=3 SV=1
PlainYeastBread.csv	BRL_A0A8I6WML0	0	2064300000	154640000000	Fructose-bisphosphate aldolase OS=Hordeum vulgare subsp. vulgare OX=112509 PE=3 SV=1
PlainYeastBread.csv	WHT_A0A3B6E9X3	0	2064300000	154640000000	Fructose-bisphosphate aldolase OS=Triticum aestivum OX=4565 GN=CFC21_033444 PE=3 SV=1
PlainYeastBread.csv	BRL_M0Y818		8529600000	1127600000	Citrate synthase OS=Hordeum vulgare subsp. vulgare OX=112509 PE=3 SV=1
PlainYeastBread.csv	WHT_A0A3B6NNP8		8529600000	1127600000	Citrate synthase OS=Triticum aestivum OX=4565 GN=CFC21_083075 PE=3 SV=1
PlainYeastBread.csv	WHT_A0A3B6REW7	3311100000	13292000000	1925500000	Dolichyl-diphosphooligosaccharide--protein glycosyltransferase subunit 3 OS=Triticum aestivum OX=4565 GN=CFC21_096594 PE=4 SV=1
PlainYeastBread.csv	BRL_F2D894	9410300000	21637000000	13509000000	Proteasome subunit alpha type OS=Hordeum vulgare subsp. vulgare OX=112509 PE=2 SV=1
PlainYeastBread.csv	WHT_A0A3B6PG72	9410300000	21637000000	13509000000	Proteasome subunit alpha type OS=Triticum aestivum OX=4565 GN=CFC21_087119 PE=3 SV=1
PlainYeastBread.csv	WHT_A0A3B6NQF0	2956000000	51953000000	17845000000	Aminopeptidase OS=Triticum aestivum OX=4565 GN=CFC21_083246 PE=3 SV=1
PlainYeastBread.csv	WHT_A0A1D5W7I4	11938000000	58058000000	46277000000	Ribosomal protein OS=Triticum aestivum OX=4565 GN=CFC21_037018 PE=3 SV=1
PlainYeastBread.csv	BRL_A0A8I6WUQ1	11938000000	58058000000	46277000000	Ribosomal protein OS=Hordeum vulgare subsp. vulgare OX=112509 PE=3 SV=1
PlainYeastBread.csv	WHT_A0A3B6LID5	5225800000	27732000000	5029300000	shikimate dehydrogenase (NADP(+)) OS=Triticum aestivum OX=4565 PE=3 SV=1
PlainYeastBread.csv	CS_Q01217	2583800000	7220900000	27500000	Protein ARG5 6 mitochondrial OS=Saccharomyces cerevisiae (strain ATCC 204508 / S288c) OX=559292 GN=ARG5 6 PE=1 SV=1
PlainYeastBread.csv	CS_P32419	3312300000	4509600000		Malate dehydrogenase peroxisomal OS=Saccharomyces cerevisiae (strain ATCC 204508 / S288c) OX=559292 GN=MDH3 PE=1 SV=3
PlainYeastBread.csv	BRL_F2DX84	3148700000	10801000000	2675100000	Predicted protein OS=Hordeum vulgare subsp. vulgare OX=112509 PE=2 SV=1
PlainYeastBread.csv	WHT_A0A3B6C285	3148700000	10801000000	2675100000	S1 motif domain-containing protein OS=Triticum aestivum OX=4565 GN=CFC21_021558 PE=3 SV=1
PlainYeastBread.csv	CS_P40075	3774500000	8373100000	0	Vesicle-associated membrane protein-associated protein SCS2 OS=Saccharomyces cerevisiae (strain ATCC 204508 / S288c) OX=559292 GN=SCS2 PE=1 SV=3
PlainYeastBread.csv	WHT_A0A3B6DNK6	2730300000	6273500000	543430000	Importin N-terminal domain-containing protein OS=Triticum aestivum OX=4565 GN=CFC21_032901 PE=4 SV=1
PlainYeastBread.csv	CS_P54115	1631200000	3341500000	3609900000	Magnesium-activated aldehyde dehydrogenase cytosolic OS=Saccharomyces cerevisiae (strain ATCC 204508 / S288c) OX=559292 GN=ALD6 PE=1 SV=4
PlainYeastBread.csv	WHT_A0A3B6SU33	1847500000	8845800000	995530000	isoleucine--tRNA ligase OS=Triticum aestivum OX=4565 PE=3 SV=1
PlainYeastBread.csv	BRL_F2DIP0	1847500000	8845800000	995530000	isoleucine--tRNA ligase OS=Hordeum vulgare subsp. vulgare OX=112509 PE=2 SV=1
PlainYeastBread.csv	WHT_A0A3B6KS96	1847500000	8845800000	995530000	isoleucine--tRNA ligase OS=Triticum aestivum OX=4565 GN=CFC21_068468 PE=3 SV=1
PlainYeastBread.csv	BRL_F2D8B8	5674700000	1831000000	12404000000	Proteasome subunit alpha type OS=Hordeum vulgare subsp. vulgare OX=112509 PE=2 SV=1
PlainYeastBread.csv	WHT_A0A1D6CXF2	5674700000	1831000000	12404000000	Proteasome subunit alpha type OS=Triticum aestivum OX=4565 GN=CFC21_097746 PE=3 SV=1
PlainYeastBread.csv	CS_P38061	22479000000	6807400000	17224000000	Large ribosomal subunit protein eL32 OS=Saccharomyces cerevisiae (strain ATCC 204508 / S288c) OX=559292 GN=RPL32 PE=1 SV=1
PlainYeastBread.csv	BRL_F2CU44	46505000000	51041000000	47974000000	Predicted protein OS=Hordeum vulgare subsp. vulgare OX=112509 PE=2 SV=1
PlainYeastBread.csv	CS_P02400	8241700000	8922200000	27477000000	Large ribosomal subunit protein P2B OS=Saccharomyces cerevisiae (strain ATCC 204508 / S288c) OX=559292 GN=RPP2B PE=1 SV=2
PlainYeastBread.csv	CS_Q02326	89497000000	138120000000	61266000000	Large ribosomal subunit protein eL6A OS=Saccharomyces cerevisiae (strain ATCC 204508 / S288c) OX=559292 GN=RPL6A PE=1 SV=2
PlainYeastBread.csv	WHT_A0A3B6HW41	34926000000	40017000000	34354000000	Dehydrin OS=Triticum aestivum OX=4565 GN=CFC21_053282 PE=3 SV=1
PlainYeastBread.csv	BRL_A0A8I6WGF3	277100000	38999000000	1671600000	Tr-type G domain-containing protein OS=Hordeum vulgare subsp. vulgare OX=112509 PE=3 SV=1
PlainYeastBread.csv	WHT_A4ZCD1	277100000	38999000000	1671600000	GTP-binding protein OS=Triticum aestivum OX=4565 GN=GBP-1 PE=2 SV=1
PlainYeastBread.csv	CS_P16120	3355600000	5953600000	3509100000	Threonine synthase OS=Saccharomyces cerevisiae (strain ATCC 204508 / S288c) OX=559292 GN=THR4 PE=1 SV=1
PlainYeastBread.csv	BRL_F2DAJ1	2666500000	31209000000	1527800000	Predicted protein OS=Hordeum vulgare subsp. vulgare OX=112509 PE=2 SV=1
PlainYeastBread.csv	WHT_A0A3B6RSL4	2666500000	31209000000	1527800000	Protein MEMO1 OS=Triticum aestivum OX=4565 GN=CFC21_040284 PE=3 SV=1
PlainYeastBread.csv	WHT_A0A3B6QI06	0	3063800000	5783800000	Fibronectin type III-like domain-containing protein OS=Triticum aestivum OX=4565 GN=CFC21_093634 PE=4 SV=1
PlainYeastBread.csv	CS_P00431	11288000000	19903000000	16417000000	Cytochrome c peroxidase mitochondrial OS=Saccharomyces cerevisiae (strain ATCC 204508 / S288c) OX=559292 GN=CCP1 PE=1 SV=2
PlainYeastBread.csv	WHT_A0A3B6TKJ0	17995000000	19642000000	21354000000	TMPIT-like protein OS=Triticum aestivum OX=4565 GN=CFC21_109429 PE=3 SV=1
PlainYeastBread.csv	CS_P52489	94978000000	0	57562000000	Pyruvate kinase 2 OS=Saccharomyces cerevisiae (strain ATCC 204508 / S288c) OX=559292 GN=PYK2 PE=1 SV=1
PlainYeastBread.csv	WHT_A0A3B6GTL4	24929000000	20379000000	5954200000	DJ-1/PfpI domain-containing protein OS=Triticum aestivum OX=4565 GN=CFC21_046565 PE=4 SV=1
PlainYeastBread.csv	CS_P53334	3798400000	9983500000		Probable family 17 glucosidase SCW4 OS=Saccharomyces cerevisiae (strain ATCC 204508 / S288c) OX=559292 GN=SCW4 PE=1 SV=1
PlainYeastBread.csv	CS_Q05506	2521700000	642910000000	4252200000	Arginine--tRNA ligase cytoplasmic OS=Saccharomyces cerevisiae (strain ATCC 204508 / S288c) OX=559292 GN=YDR341C PE=1 SV=1
PlainYeastBread.csv	CS_P39714	22608000000	2057000000	20655000000	(R R)-butanediol dehydrogenase OS=Saccharomyces cerevisiae (strain ATCC 204508 / S288c) OX=559292 GN=BDH1 PE=1 SV=2
PlainYeastBread.csv	WHT_A0A3B6JGE5	10875000000	10103000000	9277400000	Uncharacterized protein OS=Triticum aestivum OX=4565 GN=CFC21_061022 PE=3 SV=1
PlainYeastBread.csv	BRL_A0A8I6WBR4	12217000000	29502000000	16206000000	Acyl-coenzyme A oxidase OS=Hordeum vulgare subsp. vulgare OX=112509 PE=3 SV=1
PlainYeastBread.csv	WHT_A0A3B5XWM4	12217000000	29502000000	16206000000	Acyl-coenzyme A oxidase 4 peroxisomal OS=Triticum aestivum OX=4565 PE=3 SV=1
PlainYeastBread.csv	CS_P07245	7398100000	2331000000	6118400000	C-1-tetrahydrofolate synthase cytoplasmic OS=Saccharomyces cerevisiae (strain ATCC 204508 / S288c) OX=559292 GN=ADE3 PE=1 SV=1
PlainYeastBread.csv	CS_P04912	177110000000	191120000000	114150000000	Histone H2A.2 OS=Saccharomyces cerevisiae (strain ATCC 204508 / S288c) OX=559292 GN=HTA2 PE=1 SV=2
PlainYeastBread.csv	WHT_W5E8X2	73593000000	115720000000	45711000000	40S ribosomal protein S28 OS=Triticum aestivum OX=4565 GN=CFC21_038625 PE=3 SV=1
PlainYeastBread.csv	SOY_I1JQD4	73593000000	115720000000	45711000000	40S ribosomal protein S28 OS=Glycine max OX=3847 GN=GLYMA_03G205800 PE=3 SV=1
PlainYeastBread.csv	WHT_A0A3B6SIV9	6272800000	35865000000	13852000000	Cytochrome c domain-containing protein OS=Triticum aestivum OX=4565 PE=4 SV=1
PlainYeastBread.csv	WHT_A0A3B5Y4W8	0	3863500000		6-phosphogluconate dehydrogenase decarboxylating OS=Triticum aestivum OX=4565 PE=3 SV=1
PlainYeastBread.csv	WHT_A0A3B6MMW4		12508000000	1446300000	Golgin candidate 6 OS=Triticum aestivum OX=4565 GN=CFC21_076481 PE=4 SV=1
PlainYeastBread.csv	WHT_A0A3B6NYF7		3303100000	0	RNA helicase OS=Triticum aestivum OX=4565 GN=CFC21_085606 PE=3 SV=1
PlainYeastBread.csv	WHT_W5C753	11428000000	0	1741800000	Aldose 1-epimerase OS=Triticum aestivum OX=4565 GN=CAMPLR22A2D_LOCUS1695 PE=3 SV=1
PlainYeastBread.csv	WHT_A0A3B6TVJ5	4436400000	16111000000	43465000000	Delta-aminolevulinic acid dehydratase OS=Triticum aestivum OX=4565 GN=CFC21_091778 PE=3 SV=1
PlainYeastBread.csv	WHT_A0A3B6GUF6	6011300000	5569700000	1671400000	VIP1 protein OS=Triticum aestivum OX=4565 GN=CFC21_047716 PE=4 SV=1
PlainYeastBread.csv	BRL_F2DXB7	119400000	0	0	Elongation factor Tu OS=Hordeum vulgare subsp. vulgare OX=112509 PE=2 SV=1
PlainYeastBread.csv	WHT_A0A3B6HYU2	119400000	0	0	Elongation factor Tu OS=Triticum aestivum OX=4565 GN=CFC21_054072 PE=3 SV=1
PlainYeastBread.csv	CS_P22515		19096000000	6057600000	Ubiquitin-activating enzyme E1 1 OS=Saccharomyces cerevisiae (strain ATCC 204508 / S288c) OX=559292 GN=UBA1 PE=1 SV=2
PlainYeastBread.csv	BRL_F2DFM2	3407100000	4139300000	4451100000	Predicted protein OS=Hordeum vulgare subsp. vulgare OX=112509 PE=2 SV=1
PlainYeastBread.csv	WHT_A0A3B6RFX8	3407100000	4139300000	4451100000	Band 7 domain-containing protein OS=Triticum aestivum OX=4565 GN=CFC21_098042 PE=3 SV=1
PlainYeastBread.csv	CS_P38427	913600000	14501000000	10952000000	Trehalose synthase complex regulatory subunit TSL1 OS=Saccharomyces cerevisiae (strain ATCC 204508 / S288c) OX=559292 GN=TSL1 PE=1 SV=1
PlainYeastBread.csv	CS_P22203	11583000000	8032400000	12572000000	V-type proton ATPase subunit E OS=Saccharomyces cerevisiae (strain ATCC 204508 / S288c) OX=559292 GN=VMA4 PE=1 SV=4
PlainYeastBread.csv	WHT_A0A3B6QE47	5627700000			Isopropylmalate dehydrogenase-like domain-containing protein OS=Triticum aestivum OX=4565 GN=CFC21_092585 PE=3 SV=1
PlainYeastBread.csv	BRL_A0A287U3J5	5627700000			Isopropylmalate dehydrogenase-like domain-containing protein OS=Hordeum vulgare subsp. vulgare OX=112509 PE=3 SV=1
PlainYeastBread.csv	WHT_A0A3B6NR24	5627700000			Isopropylmalate dehydrogenase-like domain-containing protein OS=Triticum aestivum OX=4565 GN=CFC21_083418 PE=3 SV=1
PlainYeastBread.csv	CS_P15202	6149100000	13097000000	0	Peroxisomal catalase A OS=Saccharomyces cerevisiae (strain ATCC 204508 / S288c) OX=559292 GN=CTA1 PE=1 SV=1
PlainYeastBread.csv	WHT_A0A3B6RMS3	0	12193000000	5087700000	AAA+ ATPase domain-containing protein OS=Triticum aestivum OX=4565 PE=3 SV=1
PlainYeastBread.csv	BRL_A0A8I6YPW9	19488000000	22802000000	9814500000	K Homology domain-containing protein OS=Hordeum vulgare subsp. vulgare OX=112509 PE=4 SV=1
PlainYeastBread.csv	WHT_A0A3B6SEK1	19488000000	22802000000	9814500000	K Homology domain-containing protein OS=Triticum aestivum OX=4565 PE=4 SV=1
PlainYeastBread.csv	CS_P47169	1414200000	10804000000	3872300000	Sulfite reductase [NADPH] subunit beta OS=Saccharomyces cerevisiae (strain ATCC 204508 / S288c) OX=559292 GN=MET5 PE=1 SV=1
PlainYeastBread.csv	WHT_A0A3B5Z543		5594500000	4016900000	J domain-containing protein OS=Triticum aestivum OX=4565 GN=CFC21_008971 PE=4 SV=1
PlainYeastBread.csv	WHT_A0A3B6HWM1	8683100000	14791000000		Alanine--tRNA ligase OS=Triticum aestivum OX=4565 PE=3 SV=1
PlainYeastBread.csv	BRL_A0A8I6YBH8	8683100000	14791000000		Alanine--tRNA ligase OS=Hordeum vulgare subsp. vulgare OX=112509 PE=3 SV=1
PlainYeastBread.csv	BRL_A0A8I6XNS1	8683100000	14791000000		Alanine--tRNA ligase OS=Hordeum vulgare subsp. vulgare OX=112509 PE=3 SV=1
PlainYeastBread.csv	BRL_A0A8I6XC73	8683100000	14791000000		Alanine--tRNA ligase OS=Hordeum vulgare subsp. vulgare OX=112509 PE=3 SV=1
PlainYeastBread.csv	WHT_A0A3B6UB30	8683100000	14791000000		Alanine--tRNA ligase OS=Triticum aestivum OX=4565 PE=3 SV=1
PlainYeastBread.csv	WHT_A0A3B6JG83	8683100000	14791000000		Alanine--tRNA ligase OS=Triticum aestivum OX=4565 GN=CFC21_060534 PE=3 SV=1
PlainYeastBread.csv	WHT_A0A3B6GYB5		1930500000	0	C3H1-type domain-containing protein OS=Triticum aestivum OX=4565 GN=CFC21_048661 PE=4 SV=1
PlainYeastBread.csv	WHT_A0A3B6EKM2		1930500000	0	C3H1-type domain-containing protein OS=Triticum aestivum OX=4565 GN=CFC21_036830 PE=4 SV=1
PlainYeastBread.csv	BRL_A0A8I6XN54	0	0	0	PCI domain-containing protein OS=Hordeum vulgare subsp. vulgare OX=112509 PE=4 SV=1
PlainYeastBread.csv	WHT_A0A3B6HRC9	0	0	0	PCI domain-containing protein OS=Triticum aestivum OX=4565 GN=CFC21_051220 PE=4 SV=1
PlainYeastBread.csv	WHT_A0A3B6DBD5	37144000000	5109000000	33959000000	Thioredoxin OS=Triticum aestivum OX=4565 GN=CFC21_029526 PE=4 SV=1
PlainYeastBread.csv	WHT_Q8GVD3	37144000000	5109000000	33959000000	Thioredoxin OS=Triticum aestivum OX=4565 GN=CFC21_016776 PE=2 SV=1
PlainYeastBread.csv	WHT_A0A3B6N111	8712300000	0	0	H15 domain-containing protein OS=Triticum aestivum OX=4565 GN=CFC21_080096 PE=3 SV=1
PlainYeastBread.csv	BRL_A0A8I6WRY7		10714000000	1642700000	Gamma carbonic anhydrase OS=Hordeum vulgare subsp. vulgare OX=112509 PE=3 SV=1
PlainYeastBread.csv	WHT_A0A3B6PQ67	0	35639000000	0	Leucine-rich repeat-containing N-terminal plant-type domain-containing protein OS=Triticum aestivum OX=4565 GN=CFC21_088742 PE=4 SV=1
PlainYeastBread.csv	CS_P53691	31259000000	25517000000		Peptidyl-prolyl cis-trans isomerase CPR6 OS=Saccharomyces cerevisiae (strain ATCC 204508 / S288c) OX=559292 GN=CPR6 PE=1 SV=1
PlainYeastBread.csv	WHT_A0A3B6B0S3	12753000000	10758000000	0	Pterin-binding domain-containing protein OS=Triticum aestivum OX=4565 GN=CFC21_017564 PE=4 SV=1
PlainYeastBread.csv	WHT_A0A3B6C813	12753000000	10758000000	0	Pterin-binding domain-containing protein OS=Triticum aestivum OX=4565 GN=CFC21_023964 PE=4 SV=1
PlainYeastBread.csv	BRL_A0A8I6WVA9	12753000000	10758000000	0	Uncharacterized protein OS=Hordeum vulgare subsp. vulgare OX=112509 PE=4 SV=1
PlainYeastBread.csv	CS_P32481	19469000000	27331000000	6824900000	Eukaryotic translation initiation factor 2 subunit gamma OS=Saccharomyces cerevisiae (strain ATCC 204508 / S288c) OX=559292 GN=GCD11 PE=1 SV=1
PlainYeastBread.csv	WHT_A0A3B6JP64	12134000000	37252000000	18803000000	Dolichyl-diphosphooligosaccharide--protein glycosyltransferase subunit 1 OS=Triticum aestivum OX=4565 PE=3 SV=1
PlainYeastBread.csv	WHT_A0A3B6KT49	12134000000	37252000000	18803000000	Dolichyl-diphosphooligosaccharide--protein glycosyltransferase subunit 1 OS=Triticum aestivum OX=4565 GN=CFC21_068757 PE=3 SV=1
PlainYeastBread.csv	CS_P01098		2327400000	4699400000	F(1)-ATPase inhibitor STF1 mitochondrial OS=Saccharomyces cerevisiae (strain ATCC 204508 / S288c) OX=559292 GN=STF1 PE=1 SV=2
PlainYeastBread.csv	WHT_A0A3B6PPW7	3677500000	19615000000	6988500000	Aldehyde dehydrogenase domain-containing protein OS=Triticum aestivum OX=4565 GN=CFC21_089091 PE=3 SV=1
PlainYeastBread.csv	CS_P32796	8815400000	18757000000	9034700000	Carnitine O-acetyltransferase mitochondrial OS=Saccharomyces cerevisiae (strain ATCC 204508 / S288c) OX=559292 GN=CAT2 PE=1 SV=2
PlainYeastBread.csv	WHT_A0A077RVD7	1732700000	28086000000	22317000000	Uncharacterized protein OS=Triticum aestivum OX=4565 GN=CFC21_040828 PE=4 SV=1
PlainYeastBread.csv	WHT_A0A3B6RIB9	0		1496600000	DJ-1/PfpI domain-containing protein OS=Triticum aestivum OX=4565 GN=CFC21_098562 PE=4 SV=1
PlainYeastBread.csv	BRL_A0A8I6YWR4	0		1496600000	DJ-1/PfpI domain-containing protein OS=Hordeum vulgare subsp. vulgare OX=112509 PE=4 SV=1
PlainYeastBread.csv	WHT_A0A3B6QF50	8754100000	18838000000	9143400000	Fumarylacetoacetase OS=Triticum aestivum OX=4565 GN=CFC21_092266 PE=3 SV=1
PlainYeastBread.csv	BRL_A0A8I6Y0X7	8754100000	18838000000	9143400000	Fumarylacetoacetase OS=Hordeum vulgare subsp. vulgare OX=112509 PE=3 SV=1
PlainYeastBread.csv	WHT_A0A3B6NWS9	2738900000	3861600000	0	Enoyl reductase (ER) domain-containing protein OS=Triticum aestivum OX=4565 PE=4 SV=1
PlainYeastBread.csv	WHT_A0A3B6NVB8	2549400000	5124300000	3109900000	inorganic diphosphatase OS=Triticum aestivum OX=4565 GN=CFC21_084689 PE=3 SV=1
PlainYeastBread.csv	BRL_F2CVI3	2549400000	5124300000	3109900000	inorganic diphosphatase OS=Hordeum vulgare subsp. vulgare OX=112509 PE=2 SV=1
PlainYeastBread.csv	WHT_A0A3B6LGC6	631820000		0	Knottin scorpion toxin-like domain-containing protein OS=Triticum aestivum OX=4565 GN=CFC21_069977 PE=4 SV=1
PlainYeastBread.csv	WHT_A5HE90	11948000000	19583000000	6819100000	Hypersensitive response protein OS=Triticum aestivum OX=4565 GN=hir1 PE=2 SV=1
PlainYeastBread.csv	BRL_Q8H1V3	11948000000	19583000000	6819100000	Hypersensitive-induced reaction protein 1 OS=Hordeum vulgare subsp. vulgare OX=112509 GN=hir1 PE=2 SV=1
PlainYeastBread.csv	CS_P02557	6404600000	10907000000	6990500000	Tubulin beta chain OS=Saccharomyces cerevisiae (strain ATCC 204508 / S288c) OX=559292 GN=TUB2 PE=1 SV=2
PlainYeastBread.csv	WHT_A0A3B5ZME4	10961000000	17159000000	15889000000	Knottin scorpion toxin-like domain-containing protein OS=Triticum aestivum OX=4565 GN=CFC21_009750 PE=3 SV=1
PlainYeastBread.csv	WHT_A0A3B6JD70	592100000	0	4194800000	Lipoxygenase OS=Triticum aestivum OX=4565 GN=CFC21_060314 PE=3 SV=1
PlainYeastBread.csv	SOY_I1J8H7	0		1726200000	Peroxidase OS=Glycine max OX=3847 GN=547873 PE=3 SV=1
PlainYeastBread.csv	CS_P20606	2221200000	3942100000	3749400000	Small COPII coat GTPase SAR1 OS=Saccharomyces cerevisiae (strain ATCC 204508 / S288c) OX=559292 GN=SAR1 PE=1 SV=1
PlainYeastBread.csv	WHT_A0A3B5YSI9	5543800000	20854000000	7567300000	acetylornithine transaminase OS=Triticum aestivum OX=4565 GN=CFC21_005558 PE=3 SV=1
PlainYeastBread.csv	BRL_F2DPV2	5543800000	20854000000	7567300000	acetylornithine transaminase OS=Hordeum vulgare subsp. vulgare OX=112509 PE=2 SV=1
PlainYeastBread.csv	CS_P53184	13954000000		7062900000	Nicotinamidase OS=Saccharomyces cerevisiae (strain ATCC 204508 / S288c) OX=559292 GN=PNC1 PE=1 SV=1
PlainYeastBread.csv	CS_O74700	7711300000	14015000000	22413000000	Mitochondrial import inner membrane translocase subunit TIM9 OS=Saccharomyces cerevisiae (strain ATCC 204508 / S288c) OX=559292 GN=TIM9 PE=1 SV=1
PlainYeastBread.csv	BRL_F2CVC1	11151000000	0		isopentenyl-diphosphate Delta-isomerase OS=Hordeum vulgare subsp. vulgare OX=112509 PE=2 SV=1
PlainYeastBread.csv	WHT_A0A3B6C6M3	11151000000	0		isopentenyl-diphosphate Delta-isomerase OS=Triticum aestivum OX=4565 GN=CFC21_022971 PE=3 SV=1
PlainYeastBread.csv	WHT_A0A1D5SB94	778700000		5658100000	Ras-related protein Rab7 OS=Triticum aestivum OX=4565 GN=CFC21_008235 PE=4 SV=1
PlainYeastBread.csv	BRL_F2D5W7	778700000		5658100000	Predicted protein OS=Hordeum vulgare subsp. vulgare OX=112509 PE=2 SV=1
PlainYeastBread.csv	BRL_A0A8I6WS23	2653600000	0		chitinase OS=Hordeum vulgare subsp. vulgare OX=112509 PE=4 SV=1
PlainYeastBread.csv	WHT_A0A3B6RC59	69271000000	29301000000	41941000000	Knottin scorpion toxin-like domain-containing protein OS=Triticum aestivum OX=4565 GN=CFC21_096843 PE=3 SV=1
PlainYeastBread.csv	CS_P14120	3408000000	18452000000	17926000000	Large ribosomal subunit protein eL30 OS=Saccharomyces cerevisiae (strain ATCC 204508 / S288c) OX=559292 GN=RPL30 PE=1 SV=3
PlainYeastBread.csv	WHT_A0A3B5Z662	47074000000	82915000000	35971000000	Oleosin OS=Triticum aestivum OX=4565 GN=CFC21_009201 PE=3 SV=1
PlainYeastBread.csv	BRL_A0A8I6WV82	47074000000	82915000000	35971000000	Oleosin OS=Hordeum vulgare subsp. vulgare OX=112509 PE=3 SV=1
PlainYeastBread.csv	CS_P11632	2433100000	19566000000	1995400000	Non-histone chromosomal protein 6A OS=Saccharomyces cerevisiae (strain ATCC 204508 / S288c) OX=559292 GN=NHP6A PE=1 SV=1
PlainYeastBread.csv	BRL_A0A287MFX0	4177400000	15049000000	4071500000	2-hydroxyacyl-CoA lyase OS=Hordeum vulgare subsp. vulgare OX=112509 PE=3 SV=1
PlainYeastBread.csv	WHT_A0A077RU01	4177400000	15049000000	4071500000	2-hydroxyacyl-CoA lyase OS=Triticum aestivum OX=4565 GN=CFC21_043779 PE=3 SV=1
PlainYeastBread.csv	WHT_A0A3B6AYN4	2477100000	5952500000	5676800000	Uncharacterized protein OS=Triticum aestivum OX=4565 GN=CFC21_017210 PE=3 SV=1
PlainYeastBread.csv	BRL_A0A8I7B647	2477100000	5952500000	5676800000	Uncharacterized protein OS=Hordeum vulgare subsp. vulgare OX=112509 PE=3 SV=1
PlainYeastBread.csv	WHT_A0A3B5YST9	2765200000	5788600000	0	E3 UFM1-protein ligase 1 homolog OS=Triticum aestivum OX=4565 GN=CFC21_005219 PE=3 SV=1
PlainYeastBread.csv	BRL_A0A8I6WP44	2765200000	5788600000	0	E3 UFM1-protein ligase 1 homolog OS=Hordeum vulgare subsp. vulgare OX=112509 PE=3 SV=1
PlainYeastBread.csv	WHT_A0A3B5ZPT9	2765200000	5788600000	0	E3 UFM1-protein ligase 1 homolog OS=Triticum aestivum OX=4565 GN=CFC21_010139 PE=3 SV=1
PlainYeastBread.csv	BRL_A0A8I6ZAL1	11809000000	10947000000	7357500000	Co-chaperone protein p23 OS=Hordeum vulgare subsp. vulgare OX=112509 PE=3 SV=1
PlainYeastBread.csv	WHT_A0A3B6TRX8	11809000000	10947000000	7357500000	Co-chaperone protein p23 OS=Triticum aestivum OX=4565 GN=CFC21_109267 PE=3 SV=1
PlainYeastBread.csv	WHT_A0A3B6H256	0	16993000000	4033400000	CRAL-TRIO domain-containing protein OS=Triticum aestivum OX=4565 GN=CFC21_048972 PE=3 SV=1
PlainYeastBread.csv	CS_P28707	27443000000	37263000000	13269000000	Co-chaperone protein SBA1 OS=Saccharomyces cerevisiae (strain ATCC 204508 / S288c) OX=559292 GN=SBA1 PE=1 SV=3
PlainYeastBread.csv	WHT_A0A3B6A021	39942000000	67248000000	28643000000	Uncharacterized protein OS=Triticum aestivum OX=4565 GN=CFC21_013355 PE=3 SV=1
PlainYeastBread.csv	WHT_A0A3B6IRU6	30303000000	5836100000	0	Proteasome subunit alpha type OS=Triticum aestivum OX=4565 PE=3 SV=1
PlainYeastBread.csv	WHT_A0A3B6ITC2	3007600000	5415300000	3469700000	Macro domain-containing protein OS=Triticum aestivum OX=4565 GN=CFC21_057666 PE=4 SV=1
PlainYeastBread.csv	WHT_A0A3B6A3E9	9617200000	1601000000	0	Carboxypeptidase OS=Triticum aestivum OX=4565 GN=CFC21_014022 PE=3 SV=1
PlainYeastBread.csv	CS_P0CX44	81111000000	152460000000	8502000000	Large ribosomal subunit protein uL1B OS=Saccharomyces cerevisiae (strain ATCC 204508 / S288c) OX=559292 GN=RPL1B PE=1 SV=1
PlainYeastBread.csv	WHT_A0A3B6B2X3	464370000000	551520000000	294880000000	Oleosin OS=Triticum aestivum OX=4565 GN=CFC21_018532 PE=3 SV=1
PlainYeastBread.csv	WHT_A0A3B6QBW2	25118000000	14277000000	10354000000	Uncharacterized protein OS=Triticum aestivum OX=4565 GN=CFC21_091260 PE=4 SV=1
PlainYeastBread.csv	WHT_A0A2X0SIM8		20223000000	0	Cytochrome b-c1 complex subunit Rieske mitochondrial OS=Triticum aestivum OX=4565 GN=CAMPLR22A2D_LOCUS2870 PE=3 SV=1
PlainYeastBread.csv	WHT_W4ZNQ8	54964000000	44882000000	20209000000	Cytochrome c domain-containing protein OS=Triticum aestivum OX=4565 PE=3 SV=1
PlainYeastBread.csv	BRL_A0A287FFP0		2148700000		Methionine aminopeptidase OS=Hordeum vulgare subsp. vulgare OX=112509 PE=3 SV=1
PlainYeastBread.csv	WHT_A0A3B5Y031		2148700000		Methionine aminopeptidase OS=Triticum aestivum OX=4565 PE=3 SV=1
PlainYeastBread.csv	BRL_A0A8I6XLR3	4389800000	10273000000	4340400000	Protein CASP OS=Hordeum vulgare subsp. vulgare OX=112509 PE=3 SV=1
PlainYeastBread.csv	WHT_A0A3B6HYC5	4389800000	10273000000	4340400000	Protein CASP OS=Triticum aestivum OX=4565 PE=3 SV=1
PlainYeastBread.csv	CS_P13711		3975200000	200900000	Acyl-coenzyme A oxidase OS=Saccharomyces cerevisiae (strain ATCC 204508 / S288c) OX=559292 GN=POX1 PE=3 SV=2
PlainYeastBread.csv	WHT_A0A024CKY0	0	411510000	735640000	LEA protein OS=Triticum aestivum OX=4565 GN=LEA5 PE=2 SV=1
PlainYeastBread.csv	WHT_Q7XAP5	0	411510000	735640000	ABA inducible protein OS=Triticum aestivum OX=4565 GN=Wrab18 PE=2 SV=1
PlainYeastBread.csv	BRL_A0A8I6WRC9	8377800000	8675100000	6106800000	Coatomer subunit beta OS=Hordeum vulgare subsp. vulgare OX=112509 PE=4 SV=1
PlainYeastBread.csv	WHT_A0A3B6GML1		12576000000	9974900000	SHSP domain-containing protein OS=Triticum aestivum OX=4565 GN=CFC21_046293 PE=3 SV=1
PlainYeastBread.csv	BRL_A0A8I6X2P7	1569300000	8907700000	7813300000	Bifunctional inhibitor/plant lipid transfer protein/seed storage helical domain-containing protein OS=Hordeum vulgare subsp. vulgare OX=112509 PE=3 SV=1
PlainYeastBread.csv	CS_P39726	1274000000	0	0	Glycine cleavage system H protein mitochondrial OS=Saccharomyces cerevisiae (strain ATCC 204508 / S288c) OX=559292 GN=GCV3 PE=1 SV=3
PlainYeastBread.csv	CS_P21306	3502200000	5277500000	0	ATP synthase subunit epsilon mitochondrial OS=Saccharomyces cerevisiae (strain ATCC 204508 / S288c) OX=559292 GN=ATP15 PE=1 SV=2
PlainYeastBread.csv	BRL_A0A8I6XMW4	5538400000	21345000000	7340500000	carbamoyl-phosphate synthase (glutamine-hydrolyzing) OS=Hordeum vulgare subsp. vulgare OX=112509 PE=3 SV=1
PlainYeastBread.csv	WHT_A0A3B6GW65	5538400000	21345000000	7340500000	carbamoyl-phosphate synthase (glutamine-hydrolyzing) OS=Triticum aestivum OX=4565 GN=CFC21_047251 PE=3 SV=1
PlainYeastBread.csv	WHT_Q41579	19041000000	84368000000	6594000000	Rab protein OS=Triticum aestivum OX=4565 GN=rab 15B PE=2 SV=1
PlainYeastBread.csv	WHT_A0A2X0SIY5		2984300000	1104200000	ubiquitinyl hydrolase 1 OS=Triticum aestivum OX=4565 GN=CAMPLR22A2D_LOCUS2992 PE=3 SV=1
PlainYeastBread.csv	BRL_A0A8I7B344		2984300000	1104200000	ubiquitinyl hydrolase 1 OS=Hordeum vulgare subsp. vulgare OX=112509 PE=3 SV=1
PlainYeastBread.csv	WHT_A0A3B6B270	4838900000	19456000000	7193800000	Ubiquitin fusion degradation protein OS=Triticum aestivum OX=4565 GN=CFC21_018316 PE=3 SV=1
PlainYeastBread.csv	CS_P28777	4979300000	2486300000	2287300000	Chorismate synthase ARO2 OS=Saccharomyces cerevisiae (strain ATCC 204508 / S288c) OX=559292 GN=ARO2 PE=1 SV=1
PlainYeastBread.csv	WHT_A0A3B6I3L9		16041000000	2749300000	Proteasome subunit beta OS=Triticum aestivum OX=4565 GN=CFC21_054600 PE=3 SV=1
PlainYeastBread.csv	SOY_I1KEV3	297000000	30067000000	34145000000	Ras-related protein RABA1f OS=Glycine max OX=3847 GN=100789747 PE=4 SV=1
PlainYeastBread.csv	SOY_A0A0R0JBP2	297000000	30067000000	34145000000	Ras-related protein RABA1f OS=Glycine max OX=3847 GN=GLYMA_07G202900 PE=4 SV=1
PlainYeastBread.csv	SOY_C6TM07	297000000	30067000000	34145000000	Uncharacterized protein OS=Glycine max OX=3847 GN=100810759 PE=2 SV=1
PlainYeastBread.csv	WHT_A0A341ZHG0	297000000	30067000000	34145000000	Uncharacterized protein OS=Triticum aestivum OX=4565 GN=CFC21_098616 PE=4 SV=1
PlainYeastBread.csv	BRL_A0A8I6YXP8	297000000	30067000000	34145000000	Uncharacterized protein OS=Hordeum vulgare subsp. vulgare OX=112509 PE=4 SV=1
PlainYeastBread.csv	SOY_I1LZI1	297000000	30067000000	34145000000	Ras-related protein RABA1f OS=Glycine max OX=3847 GN=100783534 PE=4 SV=1
PlainYeastBread.csv	WHT_A0A3B6NPY6	0	33900000	0	Leucine-rich repeat-containing N-terminal plant-type domain-containing protein OS=Triticum aestivum OX=4565 GN=CFC21_083822 PE=4 SV=1
PlainYeastBread.csv	CS_P40168	0	1644500000	2691300000	Uncharacterized protein YNL195C OS=Saccharomyces cerevisiae (strain ATCC 204508 / S288c) OX=559292 GN=YNL195C PE=4 SV=2
PlainYeastBread.csv	CS_P15454	24029000000	47491000000	20181000000	Guanylate kinase OS=Saccharomyces cerevisiae (strain ATCC 204508 / S288c) OX=559292 GN=GUK1 PE=1 SV=2
PlainYeastBread.csv	WHT_O64394	27754000000	47384000000	37613000000	Thioredoxin H-type OS=Triticum aestivum OX=4565 PE=2 SV=3
PlainYeastBread.csv	WHT_Q7FT21	27754000000	47384000000	37613000000	Thioredoxin OS=Triticum aestivum OX=4565 PE=2 SV=1
PlainYeastBread.csv	CS_P39976	3262800000		1141100000	D-2-hydroxyglutarate--pyruvate transhydrogenase DLD3 OS=Saccharomyces cerevisiae (strain ATCC 204508 / S288c) OX=559292 GN=DLD3 PE=1 SV=1
PlainYeastBread.csv	WHT_A0A3B5ZSQ3	16853000000	10934000000		Cytochrome b5 heme-binding domain-containing protein OS=Triticum aestivum OX=4565 GN=CFC21_011381 PE=4 SV=1
PlainYeastBread.csv	WHT_A0A3B5Y651	14811000000	34962000000	1142000000	Ribosomal eL28/Mak16 domain-containing protein OS=Triticum aestivum OX=4565 PE=3 SV=1
PlainYeastBread.csv	WHT_A0A077S457	14811000000	34962000000	1142000000	Ribosomal eL28/Mak16 domain-containing protein OS=Triticum aestivum OX=4565 GN=CFC21_043969 PE=3 SV=1
PlainYeastBread.csv	WHT_A0A3B6I0W4	0	6711900000		Uncharacterized protein OS=Triticum aestivum OX=4565 GN=CFC21_054210 PE=4 SV=1
PlainYeastBread.csv	CS_Q03195	5426900000	9314400000	2957400000	Translation initiation factor RLI1 OS=Saccharomyces cerevisiae (strain ATCC 204508 / S288c) OX=559292 GN=RLI1 PE=1 SV=1
PlainYeastBread.csv	CS_P07246	18518000000	17732000000	14457000000	Alcohol dehydrogenase 3 mitochondrial OS=Saccharomyces cerevisiae (strain ATCC 204508 / S288c) OX=559292 GN=ADH3 PE=1 SV=2
PlainYeastBread.csv	BRL_F2D351	32565000000	48392000000		Predicted protein OS=Hordeum vulgare subsp. vulgare OX=112509 PE=2 SV=1
PlainYeastBread.csv	SOY_I1N783	74935000000			Proteasome subunit alpha type OS=Glycine max OX=3847 GN=GLYMA_19G072100 PE=3 SV=1
PlainYeastBread.csv	SOY_I1K1X5	74935000000			Proteasome subunit alpha type OS=Glycine max OX=3847 GN=100820387 PE=3 SV=1
PlainYeastBread.csv	BRL_F2CW97	5673400000	25899000000	11227000000	protein-synthesizing GTPase OS=Hordeum vulgare subsp. vulgare OX=112509 PE=2 SV=1
PlainYeastBread.csv	WHT_W5F459	5673400000	25899000000	11227000000	protein-synthesizing GTPase OS=Triticum aestivum OX=4565 GN=CFC21_008226 PE=4 SV=1
PlainYeastBread.csv	CS_P07244	1091700000	0	248900000	Bifunctional purine biosynthetic protein ADE5 7 OS=Saccharomyces cerevisiae (strain ATCC 204508 / S288c) OX=559292 GN=ADE57 PE=1 SV=1
PlainYeastBread.csv	CS_P32771	0	13457000000	14365000000	S-(hydroxymethyl)glutathione dehydrogenase OS=Saccharomyces cerevisiae (strain ATCC 204508 / S288c) OX=559292 GN=SFA1 PE=1 SV=1
PlainYeastBread.csv	WHT_A0A3B6LFT7	10697000000	2556800000	2727800000	Mitochondrial import inner membrane translocase subunit OS=Triticum aestivum OX=4565 GN=CFC21_070354 PE=3 SV=1
PlainYeastBread.csv	BRL_A0A8I6XJ32	10697000000	2556800000	2727800000	Mitochondrial import inner membrane translocase subunit OS=Hordeum vulgare subsp. vulgare OX=112509 PE=3 SV=1
PlainYeastBread.csv	BRL_F2EFP3	45836000000	36021000000	37969000000	Predicted protein OS=Hordeum vulgare subsp. vulgare OX=112509 PE=2 SV=1
PlainYeastBread.csv	WHT_A0A3B6FLB3	45836000000	36021000000	37969000000	Dienelactone hydrolase domain-containing protein OS=Triticum aestivum OX=4565 GN=CFC21_040060 PE=4 SV=1
PlainYeastBread.csv	BRL_A0A8I6WD25	2799800000	11274000000	2946200000	Beta-hexosaminidase OS=Hordeum vulgare subsp. vulgare OX=112509 PE=3 SV=1
PlainYeastBread.csv	WHT_A0A3B5YRG0	2799800000	11274000000	2946200000	Beta-hexosaminidase OS=Triticum aestivum OX=4565 GN=CFC21_005207 PE=3 SV=1
PlainYeastBread.csv	BRL_A0A8I6YCK0	1705700000	0	4254500000	Bifunctional inhibitor/plant lipid transfer protein/seed storage helical domain-containing protein OS=Hordeum vulgare subsp. vulgare OX=112509 PE=3 SV=1
PlainYeastBread.csv	CS_P15624	2143600000	11166000000	5415600000	Phenylalanine--tRNA ligase beta subunit OS=Saccharomyces cerevisiae (strain ATCC 204508 / S288c) OX=559292 GN=FRS1 PE=1 SV=3
PlainYeastBread.csv	WHT_D2KZ09		5248700000	2212300000	Seed protein B32E OS=Triticum aestivum OX=4565 GN=TaSAG2 PE=2 SV=1
PlainYeastBread.csv	BRL_A0A287NWK0	16842000	5248700000	2212300000	Target of Myb protein 1 OS=Hordeum vulgare subsp. vulgare OX=112509 PE=3 SV=1
PlainYeastBread.csv	CS_Q12480	4247700000	7321500000	3917400000	Probable electron transfer flavoprotein subunit alpha mitochondrial OS=Saccharomyces cerevisiae (strain ATCC 204508 / S288c) OX=559292 GN=AIM45 PE=1 SV=1
PlainYeastBread.csv	WHT_W5EH10	5465800000	0	0	Ribonucloprotein OS=Triticum aestivum OX=4565 GN=CFC21_051527 PE=3 SV=1
PlainYeastBread.csv	BRL_A0A8I6YSL3	1027400000	0	1673700000	Peptidyl-prolyl cis-trans isomerase OS=Hordeum vulgare subsp. vulgare OX=112509 PE=3 SV=1
PlainYeastBread.csv	WHT_A0A3B6MTR9	1027400000	0	1673700000	Peptidyl-prolyl cis-trans isomerase OS=Triticum aestivum OX=4565 GN=CFC21_077839 PE=3 SV=1
PlainYeastBread.csv	CS_P39533	4973600000	4043800000	696220000	Homocitrate dehydratase mitochondrial OS=Saccharomyces cerevisiae (strain ATCC 204508 / S288c) OX=559292 GN=ACO2 PE=1 SV=1
PlainYeastBread.csv	WHT_A0A1D5V0B3	6094900000	7009900000	4962600000	Genome assembly chromosome: II OS=Triticum aestivum OX=4565 GN=CAMPLR22A2D_LOCUS1603 PE=3 SV=1
PlainYeastBread.csv	BRL_A0A8I6YEN8		4328400000	2534400000	L-ascorbate peroxidase OS=Hordeum vulgare subsp. vulgare OX=112509 PE=3 SV=1
PlainYeastBread.csv	WHT_A0A3B6LIS0		4328400000	2534400000	L-ascorbate peroxidase OS=Triticum aestivum OX=4565 GN=CFC21_070714 PE=3 SV=1
PlainYeastBread.csv	WHT_A0A3B6LH31	2447700000	258100000		adenine phosphoribosyltransferase OS=Triticum aestivum OX=4565 GN=CFC21_070219 PE=3 SV=1
PlainYeastBread.csv	WHT_A0A3B6KQJ3	0	3105100000		DM2 domain-containing protein OS=Triticum aestivum OX=4565 GN=CFC21_067805 PE=4 SV=1
PlainYeastBread.csv	WHT_A0A3B6LTP2	0	3105100000		DM2 domain-containing protein OS=Triticum aestivum OX=4565 GN=CFC21_073662 PE=4 SV=1
PlainYeastBread.csv	WHT_A0A3B6JJ04		16034000000	16227000000	AAA+ ATPase domain-containing protein OS=Triticum aestivum OX=4565 PE=3 SV=1
PlainYeastBread.csv	BRL_A0A8I6Y1I0		16034000000	16227000000	AAA+ ATPase domain-containing protein OS=Hordeum vulgare subsp. vulgare OX=112509 PE=3 SV=1
PlainYeastBread.csv	WHT_A0A3B6H3Z8		9389200000	1405300000	HP domain-containing protein OS=Triticum aestivum OX=4565 PE=3 SV=1
PlainYeastBread.csv	CS_P13130	6710100000	4030700000	0	Sporulation-specific wall maturation protein OS=Saccharomyces cerevisiae (strain ATCC 204508 / S288c) OX=559292 GN=SPS100 PE=2 SV=1
PlainYeastBread.csv	CS_P32799	40515000000	27039000000	31484000000	Cytochrome c oxidase subunit 13 mitochondrial OS=Saccharomyces cerevisiae (strain ATCC 204508 / S288c) OX=559292 GN=COX13 PE=1 SV=1
PlainYeastBread.csv	CS_P38972	3933700000	8619800000	7136500000	Phosphoribosylformylglycinamidine synthase OS=Saccharomyces cerevisiae (strain ATCC 204508 / S288c) OX=559292 GN=ADE6 PE=1 SV=2
PlainYeastBread.csv	WHT_A0A3B6GLQ5	544220000	12963000000	229800000	Uncharacterized protein OS=Triticum aestivum OX=4565 GN=CFC21_046004 PE=3 SV=1
PlainYeastBread.csv	BRL_A0A8I6XUQ8	544220000	12963000000	229800000	3-hydroxyacyl-CoA dehydrogenase OS=Hordeum vulgare subsp. vulgare OX=112509 PE=3 SV=1
PlainYeastBread.csv	WHT_A0A3B6LUE0	784170000			Glutathione S-transferase OS=Triticum aestivum OX=4565 GN=CFC21_073843 PE=3 SV=1
PlainYeastBread.csv	WHT_A0A3B6GWF9	479100000		3408500000	Nucleobase-ascorbate transporter 2 OS=Triticum aestivum OX=4565 GN=CFC21_048131 PE=4 SV=1
PlainYeastBread.csv	BRL_F2CRC2	479100000		3408500000	Predicted protein OS=Hordeum vulgare subsp. vulgare OX=112509 PE=2 SV=1
PlainYeastBread.csv	WHT_A0A3B6IP10	0	206070000000	120250000000	Serpin domain-containing protein OS=Triticum aestivum OX=4565 GN=CFC21_056751 PE=3 SV=1
PlainYeastBread.csv	BRL_A0A8I6Y9M5	10059000000	969800000	11455000000	Aminotransferase class I/classII domain-containing protein OS=Hordeum vulgare subsp. vulgare OX=112509 PE=4 SV=1
PlainYeastBread.csv	WHT_A0A3B6LMZ8	10059000000	969800000	11455000000	Aminotransferase class I/classII domain-containing protein OS=Triticum aestivum OX=4565 PE=4 SV=1
PlainYeastBread.csv	WHT_A0A3B6NNI7	5553600000	30244000000	12512000000	T-complex protein 1 subunit eta OS=Triticum aestivum OX=4565 GN=CFC21_082706 PE=3 SV=1
PlainYeastBread.csv	BRL_A0A8I6YBK2	5553600000	26712000000	12512000000	T-complex protein 1 subunit eta OS=Hordeum vulgare subsp. vulgare OX=112509 PE=3 SV=1
PlainYeastBread.csv	BRL_A0A8I6XWP1		11925000000	613580000	Transducin beta-like protein 2 OS=Hordeum vulgare subsp. vulgare OX=112509 PE=4 SV=1
PlainYeastBread.csv	WHT_A0A3B6LXJ5		11925000000	613580000	Transducin beta-like protein 2 OS=Triticum aestivum OX=4565 GN=CFC21_075225 PE=4 SV=1
PlainYeastBread.csv	BRL_A0A8I6XHT9	30391000000	32031000000	1509000000	Outer envelope pore protein 16-2 chloroplastic OS=Hordeum vulgare subsp. vulgare OX=112509 PE=4 SV=1
PlainYeastBread.csv	WHT_A0A3B6LFE7	24996000000	71413000000	51339000000	SMP domain-containing protein OS=Triticum aestivum OX=4565 GN=CFC21_069627 PE=3 SV=1
PlainYeastBread.csv	CS_P81449	557700000	0	514370000	ATP synthase subunit e mitochondrial OS=Saccharomyces cerevisiae (strain ATCC 204508 / S288c) OX=559292 GN=TIM11 PE=1 SV=2
PlainYeastBread.csv	BRL_A0A8I6Y204	4168200000	0	0	SMP domain-containing protein OS=Hordeum vulgare subsp. vulgare OX=112509 PE=3 SV=1
PlainYeastBread.csv	WHT_A0A3B6QAJ9	32734000000			Mitochondrial ATP synthase OS=Triticum aestivum OX=4565 GN=CFC21_091593 PE=4 SV=1
PlainYeastBread.csv	WHT_A0A3B6MZH1	10521000000	5230700000	6134400000	X8 domain-containing protein OS=Triticum aestivum OX=4565 GN=CFC21_079561 PE=4 SV=1
PlainYeastBread.csv	WHT_A0A3B5Y383	751280000	0	0	inorganic diphosphatase OS=Triticum aestivum OX=4565 PE=3 SV=1
PlainYeastBread.csv	BRL_A0A8I6WVZ6	751280000	0	0	inorganic diphosphatase OS=Hordeum vulgare subsp. vulgare OX=112509 PE=3 SV=1
PlainYeastBread.csv	WHT_W5FWW5		32932000000	6129300000	alanine transaminase OS=Triticum aestivum OX=4565 GN=TaCQsd1 PE=2 SV=1
PlainYeastBread.csv	WHT_A0A3B6NNB1	8478800000	17607000000	6355800000	MPN domain-containing protein OS=Triticum aestivum OX=4565 GN=CFC21_082735 PE=3 SV=1
PlainYeastBread.csv	WHT_A0A3B6MXH0	5383300000	18142000000	3255600000	MOSC domain-containing protein OS=Triticum aestivum OX=4565 GN=CFC21_079259 PE=4 SV=1
PlainYeastBread.csv	WHT_A0A3B6KLX8	5383300000	18142000000	3255600000	MOSC domain-containing protein OS=Triticum aestivum OX=4565 GN=CFC21_067443 PE=4 SV=1
PlainYeastBread.csv	WHT_A0A3B6FX77	2013100000	3504600000		Uncharacterized protein OS=Triticum aestivum OX=4565 GN=CFC21_044243 PE=3 SV=1
PlainYeastBread.csv	CS_Q12458	905230000	6237800000	0	Putative reductase 1 OS=Saccharomyces cerevisiae (strain ATCC 204508 / S288c) OX=559292 GN=YPR1 PE=1 SV=1
PlainYeastBread.csv	CS_P25719	4519600000	3307500000	585470000	Peptidyl-prolyl cis-trans isomerase C mitochondrial OS=Saccharomyces cerevisiae (strain ATCC 204508 / S288c) OX=559292 GN=CPR3 PE=1 SV=1
PlainYeastBread.csv	WHT_A0A3B6NII8	1106700000	3307500000	2631200000	Knottin scorpion toxin-like domain-containing protein OS=Triticum aestivum OX=4565 GN=CFC21_081401 PE=4 SV=1
PlainYeastBread.csv	BRL_A0A8I6Y364	0	1631100000	2040400000	Glycosyl hydrolase family 95 N-terminal domain-containing protein OS=Hordeum vulgare subsp. vulgare OX=112509 PE=4 SV=1
PlainYeastBread.csv	WHT_A0A3B6JLD4	0	1631100000	2040400000	Glycosyl hydrolase family 95 N-terminal domain-containing protein OS=Triticum aestivum OX=4565 GN=CFC21_062585 PE=4 SV=1
PlainYeastBread.csv	WHT_A0A3B6LKT1	577100000	9127200000	624400000	GrpE protein homolog OS=Triticum aestivum OX=4565 PE=3 SV=1
PlainYeastBread.csv	WHT_A0A3B6H2J0	5578700000	33262000000	13267000000	Pyrroline-5-carboxylate reductase OS=Triticum aestivum OX=4565 GN=CFC21_050069 PE=3 SV=1
PlainYeastBread.csv	BRL_F2E7Q2	5578700000	33262000000	13267000000	Pyrroline-5-carboxylate reductase OS=Hordeum vulgare subsp. vulgare OX=112509 PE=2 SV=1
PlainYeastBread.csv	WHT_A0A3B6KQD1	2882100000	6473900000	10924000000	Phytocyanin domain-containing protein OS=Triticum aestivum OX=4565 GN=CFC21_067742 PE=4 SV=1
PlainYeastBread.csv	WHT_A0A3B6LTH8	2882100000	6473900000	10924000000	Phytocyanin domain-containing protein OS=Triticum aestivum OX=4565 GN=CFC21_073609 PE=4 SV=1
PlainYeastBread.csv	WHT_A0A3B5Y6R3		8762500000	16126000000	Uncharacterized protein OS=Triticum aestivum OX=4565 PE=4 SV=1
PlainYeastBread.csv	CS_P07267	0	0	1995800000	Saccharopepsin OS=Saccharomyces cerevisiae (strain ATCC 204508 / S288c) OX=559292 GN=PEP4 PE=1 SV=1
PlainYeastBread.csv	BRL_A0A8I6WVQ0	2411600000	6383600000	418290000	Acyl-[acyl-carrier-protein] desaturase OS=Hordeum vulgare subsp. vulgare OX=112509 PE=3 SV=1
PlainYeastBread.csv	WHT_W5CT81	2411600000	6383600000	418290000	Acyl-[acyl-carrier-protein] desaturase OS=Triticum aestivum OX=4565 GN=CFC21_043543 PE=3 SV=1
PlainYeastBread.csv	WHT_A0A3B6ENR3	2411600000	6383600000	418290000	Acyl-[acyl-carrier-protein] desaturase OS=Triticum aestivum OX=4565 GN=CFC21_037592 PE=3 SV=1
PlainYeastBread.csv	BRL_A0A8I6XWG4	2678600000	10696000000		PDZ domain-containing protein OS=Hordeum vulgare subsp. vulgare OX=112509 PE=3 SV=1
PlainYeastBread.csv	WHT_A0A3B6PQV2	2678600000	10696000000		PDZ domain-containing protein OS=Triticum aestivum OX=4565 PE=3 SV=1
PlainYeastBread.csv	WHT_A0A3B6NR90	2678600000	10696000000		PDZ domain-containing protein OS=Triticum aestivum OX=4565 GN=CFC21_084176 PE=3 SV=1
PlainYeastBread.csv	CS_P23644	12318000000	597770000	7906900000	Mitochondrial import receptor subunit TOM40 OS=Saccharomyces cerevisiae (strain ATCC 204508 / S288c) OX=559292 GN=TOM40 PE=1 SV=1
PlainYeastBread.csv	WHT_A0A3B6DR77	1591400000	25328000000	12545000000	chitinase OS=Triticum aestivum OX=4565 GN=CFC21_032888 PE=4 SV=1
PlainYeastBread.csv	WHT_A0A3B6CHL3	1591400000	25328000000	12545000000	chitinase OS=Triticum aestivum OX=4565 GN=CFC21_026849 PE=4 SV=1
PlainYeastBread.csv	WHT_A0A3B6EEJ9	1729700000	6903900000	912490000	NADH-cytochrome b5 reductase OS=Triticum aestivum OX=4565 GN=CFC21_034561 PE=3 SV=1
PlainYeastBread.csv	WHT_A0A3B6C9Z0	0	22272000000	5455500000	Uncharacterized protein OS=Triticum aestivum OX=4565 GN=CFC21_024529 PE=4 SV=1
PlainYeastBread.csv	BRL_M0WT98		26392000000	12363000000	Eukaryotic translation initiation factor 6 OS=Hordeum vulgare subsp. vulgare OX=112509 GN=EIF6 PE=3 SV=1
PlainYeastBread.csv	WHT_W5C7G6		26392000000	12363000000	Eukaryotic translation initiation factor 6 OS=Triticum aestivum OX=4565 GN=EIF6 PE=3 SV=1
PlainYeastBread.csv	BRL_A0A8I6YGI7	4908900000	7472800000	3338900000	4-coumarate--CoA ligase OS=Hordeum vulgare subsp. vulgare OX=112509 PE=3 SV=1
PlainYeastBread.csv	BRL_M0YW47	6764400000	1873200000	2663300000	Uncharacterized protein OS=Hordeum vulgare subsp. vulgare OX=112509 PE=3 SV=1
PlainYeastBread.csv	WHT_A0A3B6TH67	6764400000	1873200000	2663300000	GH18 domain-containing protein OS=Triticum aestivum OX=4565 PE=3 SV=1
PlainYeastBread.csv	WHT_A0A3B6CGJ7	7643100000	12901000000	4702800000	Clathrin light chain OS=Triticum aestivum OX=4565 GN=CFC21_026552 PE=3 SV=1
PlainYeastBread.csv	BRL_A0A8I6XI44	7643100000	12901000000	4702800000	Clathrin light chain OS=Hordeum vulgare subsp. vulgare OX=112509 PE=3 SV=1
PlainYeastBread.csv	WHT_A0A3B6B9R9	6545200000	12901000000	4702800000	Clathrin light chain OS=Triticum aestivum OX=4565 GN=CFC21_020406 PE=3 SV=1
PlainYeastBread.csv	CS_Q06151	10665000000	4249100000	2514500000	m7GpppX diphosphatase OS=Saccharomyces cerevisiae (strain ATCC 204508 / S288c) OX=559292 GN=DCS1 PE=1 SV=1
PlainYeastBread.csv	WHT_A0A3B6NKC9	0	15775000000	1001400000	GST C-terminal domain-containing protein OS=Triticum aestivum OX=4565 GN=CFC21_081957 PE=4 SV=1
PlainYeastBread.csv	BRL_A0A8I6YGK8	0	15775000000	1001400000	GST C-terminal domain-containing protein OS=Hordeum vulgare subsp. vulgare OX=112509 PE=4 SV=1
PlainYeastBread.csv	WHT_A0A3B6LV48	4970700000		16819000000	40S ribosomal protein S15 OS=Triticum aestivum OX=4565 GN=CFC21_074055 PE=3 SV=1
PlainYeastBread.csv	WHT_A0A3B6GU40	4855000000	59225000000	0	Uncharacterized protein OS=Triticum aestivum OX=4565 GN=CFC21_041450 PE=4 SV=1
PlainYeastBread.csv	WHT_A0A1D5X2E0	1898400000	11139000000	8715700000	Protein transport protein Sec61 subunit beta OS=Triticum aestivum OX=4565 GN=CFC21_052629 PE=3 SV=1
PlainYeastBread.csv	BRL_F2CQI5	1898400000	11139000000	8715700000	Predicted protein OS=Hordeum vulgare subsp. vulgare OX=112509 PE=2 SV=1
PlainYeastBread.csv	WHT_A0A3B6CAY6	0	2676400000	0	Fe2OG dioxygenase domain-containing protein OS=Triticum aestivum OX=4565 GN=CFC21_024143 PE=3 SV=1
PlainYeastBread.csv	WHT_A0A3B6RPS7	8209600000	10331000000	5227800000	Bifunctional inhibitor/plant lipid transfer protein/seed storage helical domain-containing protein OS=Triticum aestivum OX=4565 GN=CFC21_099594 PE=4 SV=1
PlainYeastBread.csv	WHT_A0A3B6TQC4	8209600000	10331000000	5227800000	Bifunctional inhibitor/plant lipid transfer protein/seed storage helical domain-containing protein OS=Triticum aestivum OX=4565 GN=CFC21_110841 PE=4 SV=1
PlainYeastBread.csv	WHT_W5CL20	138100000	3971900000	366500000	HTH cro/C1-type domain-containing protein OS=Triticum aestivum OX=4565 GN=CFC21_040618 PE=4 SV=1
PlainYeastBread.csv	BRL_A0A8I6XKP9	138100000	3971900000	366500000	HTH cro/C1-type domain-containing protein OS=Hordeum vulgare subsp. vulgare OX=112509 PE=4 SV=1
PlainYeastBread.csv	WHT_A0A1D6DFP1	0	25742000000	10969000000	Genome assembly chromosome: II OS=Triticum aestivum OX=4565 GN=CAMPLR22A2D_LOCUS2370 PE=3 SV=1
PlainYeastBread.csv	WHT_A0A077RP15	15334000000	4453900000		Sucrose-phosphate synthase OS=Triticum aestivum OX=4565 GN=CFC21_038937 PE=3 SV=1
PlainYeastBread.csv	CS_Q02486	677180000	25123000000	12999000000	ARS-binding factor 2 mitochondrial OS=Saccharomyces cerevisiae (strain ATCC 204508 / S288c) OX=559292 GN=ABF2 PE=1 SV=1
PlainYeastBread.csv	WHT_A0A3B6NL89		38986000000	2953500000	Ubiquitin thioesterase OTU OS=Triticum aestivum OX=4565 GN=CFC21_083078 PE=4 SV=1
PlainYeastBread.csv	BRL_A0A287Q7U2	4081200000	10792000000	0	Uncharacterized protein OS=Hordeum vulgare subsp. vulgare OX=112509 PE=4 SV=1
PlainYeastBread.csv	WHT_A0A3B6LFH8	4081200000	10792000000	0	Uncharacterized protein OS=Triticum aestivum OX=4565 PE=4 SV=1
PlainYeastBread.csv	WHT_A0A3B6TBY9		3315800000	0	CBM20 domain-containing protein OS=Triticum aestivum OX=4565 GN=CFC21_106738 PE=3 SV=1
PlainYeastBread.csv	WHT_A0A3B6EIU5	13587000000	17423000000	5310900000	glutathione transferase OS=Triticum aestivum OX=4565 GN=CFC21_036299 PE=3 SV=1
PlainYeastBread.csv	CS_P01120		1056100000	67130000	Ras-like protein 2 OS=Saccharomyces cerevisiae (strain ATCC 204508 / S288c) OX=559292 GN=RAS2 PE=1 SV=4
PlainYeastBread.csv	WHT_W5HFJ0	5688800000	6304200000	13523000000	60S ribosomal protein L31 OS=Triticum aestivum OX=4565 GN=CFC21_097483 PE=3 SV=1
PlainYeastBread.csv	WHT_W5G990		6304200000	9767200000	60S ribosomal protein L31 OS=Triticum aestivum OX=4565 GN=CFC21_084218 PE=3 SV=1
PlainYeastBread.csv	CS_P08067	31746000000	52119000000	2001000000	Cytochrome b-c1 complex subunit Rieske mitochondrial OS=Saccharomyces cerevisiae (strain ATCC 204508 / S288c) OX=559292 GN=RIP1 PE=1 SV=1
PlainYeastBread.csv	CS_P49367	0	0	0	Homoaconitase mitochondrial OS=Saccharomyces cerevisiae (strain ATCC 204508 / S288c) OX=559292 GN=LYS4 PE=1 SV=1
PlainYeastBread.csv	BRL_F2DEW2	332300000	4306300000	3686800000	tyrosine--tRNA ligase OS=Hordeum vulgare subsp. vulgare OX=112509 PE=2 SV=1
PlainYeastBread.csv	WHT_A0A3B6TKL3	332300000	4306300000	3686800000	tyrosine--tRNA ligase OS=Triticum aestivum OX=4565 GN=CFC21_109445 PE=3 SV=1
PlainYeastBread.csv	WHT_W5DXN4	26894000000	65602000000	5614300000	Uncharacterized protein OS=Triticum aestivum OX=4565 GN=CFC21_051256 PE=3 SV=1
PlainYeastBread.csv	WHT_A0A3B6TMI0		0	265800000	Senescence domain-containing protein OS=Triticum aestivum OX=4565 GN=CFC21_111706 PE=4 SV=1
PlainYeastBread.csv	SOY_P02858	0	7332300000	607720000	Glycinin G4 OS=Glycine max OX=3847 GN=GY4 PE=1 SV=2
PlainYeastBread.csv	BRL_A0A287F8M8	1531200000	2043500000	0	UDP-glucose:glycoprotein glucosyltransferase OS=Hordeum vulgare subsp. vulgare OX=112509 PE=3 SV=1
PlainYeastBread.csv	WHT_A0A3B5YWS7	1531200000	2043500000		UDP-glucose:glycoprotein glucosyltransferase OS=Triticum aestivum OX=4565 PE=3 SV=1
PlainYeastBread.csv	WHT_A0A3B6HWI4	0	0		RRM domain-containing protein OS=Triticum aestivum OX=4565 GN=CFC21_052308 PE=4 SV=1
PlainYeastBread.csv	BRL_F2E3F5	0	0		Predicted protein OS=Hordeum vulgare subsp. vulgare OX=112509 PE=2 SV=1
PlainYeastBread.csv	CS_P11633	0	16603000000	8399900000	Non-histone chromosomal protein 6B OS=Saccharomyces cerevisiae (strain ATCC 204508 / S288c) OX=559292 GN=NHP6B PE=1 SV=3
PlainYeastBread.csv	BRL_A0A8I7B9H9	233500000	2915100000	2466300000	Proteasome subunit beta OS=Hordeum vulgare subsp. vulgare OX=112509 PE=3 SV=1
PlainYeastBread.csv	WHT_A0A3B6IN84	233500000	2915100000	2466300000	Proteasome subunit beta OS=Triticum aestivum OX=4565 GN=CFC21_056931 PE=3 SV=1
PlainYeastBread.csv	CS_P39730	0	2892700000	4197800000	Eukaryotic translation initiation factor 5B OS=Saccharomyces cerevisiae (strain ATCC 204508 / S288c) OX=559292 GN=FUN12 PE=1 SV=2
PlainYeastBread.csv	CS_P08566	0	5917300000		Pentafunctional AROM polypeptide OS=Saccharomyces cerevisiae (strain ATCC 204508 / S288c) OX=559292 GN=ARO1 PE=1 SV=1
PlainYeastBread.csv	BRL_A0A8I6WY44	665600000	4552600000	8221800000	Bifunctional inhibitor/plant lipid transfer protein/seed storage helical domain-containing protein OS=Hordeum vulgare subsp. vulgare OX=112509 PE=4 SV=1
PlainYeastBread.csv	CS_P09733	933600000	4849700000	1219300000	Tubulin alpha-1 chain OS=Saccharomyces cerevisiae (strain ATCC 204508 / S288c) OX=559292 GN=TUB1 PE=1 SV=2
PlainYeastBread.csv	WHT_A0A3B6MYF0	5043300000	148650000000	6716800000	UspA domain-containing protein OS=Triticum aestivum OX=4565 GN=CFC21_079526 PE=4 SV=1
PlainYeastBread.csv	BRL_A0A8I6YLG7	5043300000		5905300000	UspA domain-containing protein OS=Hordeum vulgare subsp. vulgare OX=112509 PE=4 SV=1
PlainYeastBread.csv	WHT_A0A3B6KLZ5	5043300000		5905300000	UspA domain-containing protein OS=Triticum aestivum OX=4565 GN=CFC21_067683 PE=4 SV=1
PlainYeastBread.csv	WHT_A0A3B6RHT0	155200000	7957400000	391710000	glycerophosphodiester phosphodiesterase OS=Triticum aestivum OX=4565 GN=CFC21_097475 PE=4 SV=1
PlainYeastBread.csv	CS_P39939	46006000000	115370000000	23293000000	Small ribosomal subunit protein eS26B OS=Saccharomyces cerevisiae (strain ATCC 204508 / S288c) OX=559292 GN=RPS26B PE=1 SV=1
PlainYeastBread.csv	BRL_A2SXS0	2931900000	9259700000	1541100000	Uricase OS=Hordeum vulgare subsp. vulgare OX=112509 PE=2 SV=1
PlainYeastBread.csv	WHT_A0A3B6H1U7	2931900000	9259700000	1541100000	Uricase OS=Triticum aestivum OX=4565 GN=CFC21_048885 PE=3 SV=1
PlainYeastBread.csv	WHT_A0A3B5Y061	7275800000	911800000	5482900000	Branched-chain-amino-acid aminotransferase OS=Triticum aestivum OX=4565 PE=3 SV=1
PlainYeastBread.csv	CS_P02294	171550000000	159280000000	103140000000	Histone H2B.2 OS=Saccharomyces cerevisiae (strain ATCC 204508 / S288c) OX=559292 GN=HTB2 PE=1 SV=2
PlainYeastBread.csv	WHT_W5FLH0	3217000000	35343000000	29056000000	60S ribosomal protein L36 OS=Triticum aestivum OX=4565 GN=CFC21_069861 PE=3 SV=1
PlainYeastBread.csv	WHT_A0A3B5Y2K5	3217000000	35343000000	29056000000	60S ribosomal protein L36 OS=Triticum aestivum OX=4565 PE=3 SV=1
PlainYeastBread.csv	BRL_A0A8I6XF19	3084100000	45222000000	1958600000	MI domain-containing protein OS=Hordeum vulgare subsp. vulgare OX=112509 PE=3 SV=1
PlainYeastBread.csv	WHT_A0A3B6C8T5	3084100000	45222000000	1958600000	MI domain-containing protein OS=Triticum aestivum OX=4565 GN=CFC21_024218 PE=3 SV=1
PlainYeastBread.csv	CS_P0CT04	20619000000	41482000000	11509000000	Protease B inhibitor 2 OS=Saccharomyces cerevisiae (strain ATCC 204508 / S288c) OX=559292 GN=PBI2 PE=1 SV=1
PlainYeastBread.csv	BRL_A0A8I6YLQ8	3635900000	10578000000	3099300000	Acetolactate synthase OS=Hordeum vulgare subsp. vulgare OX=112509 PE=3 SV=1
PlainYeastBread.csv	WHT_A0A3B6NUA5	3635900000	10578000000	3099300000	Acetolactate synthase OS=Triticum aestivum OX=4565 GN=CFC21_084286 PE=3 SV=1
PlainYeastBread.csv	CS_Q06625	0	1603600000	991820000	Glycogen debranching enzyme OS=Saccharomyces cerevisiae (strain ATCC 204508 / S288c) OX=559292 GN=GDB1 PE=1 SV=1
PlainYeastBread.csv	SOY_I1J7T4	0	0		Methionine aminopeptidase OS=Glycine max OX=3847 GN=100785022 PE=3 SV=1
PlainYeastBread.csv	SOY_I1NJ52	78800000	8108800000	7393100000	GTP-binding protein SAR1A OS=Glycine max OX=3847 GN=GLYMA_20G239600 PE=3 SV=1
PlainYeastBread.csv	WHT_Q54AH7	20100000	2234700000	1187100000	ATP synthase protein MI25 OS=Triticum aestivum OX=4565 GN=orf25 PE=3 SV=1
PlainYeastBread.csv	BRL_A0A191TDI2	20100000	2234700000	1187100000	ATP synthase protein MI25 OS=Hordeum vulgare subsp. vulgare OX=112509 GN=atp4 PE=3 SV=1
PlainYeastBread.csv	BRL_F2E2L5	6782300000	19234000000	8696100000	Predicted protein OS=Hordeum vulgare subsp. vulgare OX=112509 PE=2 SV=1
PlainYeastBread.csv	WHT_A0A3B6RKI0	6782300000	19234000000	8696100000	Calmodulin OS=Triticum aestivum OX=4565 GN=CaM13-7A PE=2 SV=1
PlainYeastBread.csv	WHT_A0A3B6H0X0	714900000	12456000000	5625800000	GT47_2D OS=Triticum aestivum OX=4565 GN=CFC21_049546 PE=3 SV=1
PlainYeastBread.csv	BRL_F2DSJ2	714900000	12456000000	5625800000	Predicted protein OS=Hordeum vulgare subsp. vulgare OX=112509 PE=2 SV=1
PlainYeastBread.csv	WHT_A0A3B6ET27	714900000	12456000000	5625800000	Exostosin GT47 domain-containing protein OS=Triticum aestivum OX=4565 GN=CFC21_037714 PE=3 SV=1
PlainYeastBread.csv	CS_P38071	10913000000	9023400000	9252600000	Enoyl-[acyl-carrier-protein] reductase mitochondrial OS=Saccharomyces cerevisiae (strain ATCC 204508 / S288c) OX=559292 GN=ETR1 PE=1 SV=3
PlainYeastBread.csv	SOY_P04347	4990800000	2020500000	111800000	Glycinin G5 OS=Glycine max OX=3847 GN=GY5 PE=1 SV=1
PlainYeastBread.csv	WHT_A0A3B6GXX9	5254500000	538800000	2613900000	Osmotin-like protein OS=Triticum aestivum OX=4565 GN=CFC21_048710 PE=4 SV=1
PlainYeastBread.csv	WHT_A0A3B6INL0	0	3182900000	522950000	CBS domain-containing protein OS=Triticum aestivum OX=4565 PE=4 SV=1
PlainYeastBread.csv	BRL_A0A8I6Y0X3	9732300000	235000000	7959100000	S-adenosylmethionine synthase OS=Hordeum vulgare subsp. vulgare OX=112509 PE=3 SV=1
PlainYeastBread.csv	WHT_W5GBW4	9732300000	235000000	7959100000	S-adenosylmethionine synthase OS=Triticum aestivum OX=4565 GN=CFC21_083100 PE=3 SV=1
PlainYeastBread.csv	WHT_A0A3B5YVX6	4060200000	11147000000	2722100000	ATP synthase subunit gamma OS=Triticum aestivum OX=4565 GN=CFC21_006174 PE=3 SV=1
PlainYeastBread.csv	WHT_A0A3B6IVF7	8907600000	19825000000	7058900000	methionine--tRNA ligase OS=Triticum aestivum OX=4565 GN=CFC21_058425 PE=3 SV=1
PlainYeastBread.csv	BRL_F2D868	8907600000	19825000000	7058900000	methionine--tRNA ligase OS=Hordeum vulgare subsp. vulgare OX=112509 PE=2 SV=1
PlainYeastBread.csv	WHT_A0A3B6ES99	3500400000	5270800000	2647400000	Phosphotransferase OS=Triticum aestivum OX=4565 GN=CFC21_038114 PE=3 SV=1
PlainYeastBread.csv	WHT_A0A3B6U5E5	11667000000	30134000000	13369000000	Ribosomal protein L35A OS=Triticum aestivum OX=4565 GN=CFC21_084847 PE=3 SV=1
PlainYeastBread.csv	WHT_A0A3B6NMI6	0	10075000000	759820000	Uncharacterized protein OS=Triticum aestivum OX=4565 GN=CFC21_082651 PE=3 SV=1
PlainYeastBread.csv	CS_P22137	629100000	51700000	4310700000	Clathrin heavy chain OS=Saccharomyces cerevisiae (strain ATCC 204508 / S288c) OX=559292 GN=CHC1 PE=1 SV=1
PlainYeastBread.csv	WHT_A0A3B6RPJ5		9353300000	1248200000	Fe2OG dioxygenase domain-containing protein OS=Triticum aestivum OX=4565 GN=CFC21_099518 PE=3 SV=1
PlainYeastBread.csv	WHT_A0A3B6HYJ8	802360000	5300900000	2205100000	Methylthioribose-1-phosphate isomerase OS=Triticum aestivum OX=4565 GN=CFC21_052834 PE=3 SV=1
PlainYeastBread.csv	WHT_W5EP45	1195800000	10008000000	2667600000	40S ribosomal protein S25 OS=Triticum aestivum OX=4565 GN=CFC21_009979 PE=3 SV=1
PlainYeastBread.csv	WHT_A0A3B6PNL1	2151500000	3815500000		Ubiquitin carboxyl-terminal hydrolase OS=Triticum aestivum OX=4565 GN=CFC21_088705 PE=3 SV=1
PlainYeastBread.csv	WHT_A0A3B6QI12	2151500000	3815500000		Ubiquitin carboxyl-terminal hydrolase OS=Triticum aestivum OX=4565 GN=CFC21_093043 PE=3 SV=1
PlainYeastBread.csv	WHT_A0A3B6NSB4	2151500000	3815500000		ubiquitinyl hydrolase 1 OS=Triticum aestivum OX=4565 PE=4 SV=1
PlainYeastBread.csv	BRL_F2E4I7	4401100000	679200000	4452700000	Predicted protein OS=Hordeum vulgare subsp. vulgare OX=112509 PE=2 SV=1
PlainYeastBread.csv	WHT_A0A3B6HND4	4401100000	679200000	4452700000	DEAD-box ATP-dependent RNA helicase 38 OS=Triticum aestivum OX=4565 PE=4 SV=1
PlainYeastBread.csv	WHT_A0A3B5ZQ29	0	0	1258900000	asparagine--tRNA ligase OS=Triticum aestivum OX=4565 PE=3 SV=1
PlainYeastBread.csv	BRL_A0A8I7B2K2	0	0	1258900000	asparagine--tRNA ligase OS=Hordeum vulgare subsp. vulgare OX=112509 PE=3 SV=1
PlainYeastBread.csv	CS_P07260	275300000	10344000000	5115300000	Eukaryotic translation initiation factor 4E OS=Saccharomyces cerevisiae (strain ATCC 204508 / S288c) OX=559292 GN=CDC33 PE=1 SV=1
PlainYeastBread.csv	WHT_A0A3B6LME7	1471500000	612500000	1010200000	Eukaryotic translation initiation factor 3 subunit C OS=Triticum aestivum OX=4565 GN=CFC21_071727 PE=3 SV=1
PlainYeastBread.csv	BRL_A0A8I7BEK7	1471500000	612500000	1010200000	Eukaryotic translation initiation factor 3 subunit C OS=Hordeum vulgare subsp. vulgare OX=112509 PE=3 SV=1
PlainYeastBread.csv	WHT_W5G5Q1	147000000	17309000000	9009200000	Cytochrome b5 heme-binding domain-containing protein OS=Triticum aestivum OX=4565 GN=CFC21_084962 PE=4 SV=1
PlainYeastBread.csv	BRL_A0A8I7BCL5	147000000	17309000000	9009200000	Cytochrome b5 heme-binding domain-containing protein OS=Hordeum vulgare subsp. vulgare OX=112509 PE=4 SV=1
PlainYeastBread.csv	BRL_F2E306	671080000	8489700000	1772800000	Predicted protein OS=Hordeum vulgare subsp. vulgare OX=112509 PE=2 SV=1
PlainYeastBread.csv	WHT_W5CT58	671080000	8489700000	1772800000	OB domain-containing protein OS=Triticum aestivum OX=4565 GN=CFC21_042218 PE=4 SV=1
PlainYeastBread.csv	WHT_A0A3B6IZC0	7064700000	8082600000	227600000	Malectin-like domain-containing protein OS=Triticum aestivum OX=4565 GN=CFC21_059397 PE=4 SV=1
PlainYeastBread.csv	WHT_A0A3B6JCH1	9590400000	21282000000	5382300000	Germin-like protein OS=Triticum aestivum OX=4565 GN=CFC21_060290 PE=3 SV=1
PlainYeastBread.csv	WHT_A0A3B6CA63	2450900000	11243000000	3577500000	Uncharacterized protein OS=Triticum aestivum OX=4565 GN=CFC21_024638 PE=3 SV=1
PlainYeastBread.csv	BRL_A0A8I6YK17	0	19544000000	0	3-oxoacyl-[acyl-carrier-protein] synthase OS=Hordeum vulgare subsp. vulgare OX=112509 PE=3 SV=1
PlainYeastBread.csv	WHT_A0A3B6SEU6	0	19544000000	0	3-oxoacyl-[acyl-carrier-protein] synthase OS=Triticum aestivum OX=4565 GN=CFC21_101604 PE=3 SV=1
PlainYeastBread.csv	BRL_A0A8I6XTB9	3661400000	3768400000	158500000	Glutaredoxin-dependent peroxiredoxin OS=Hordeum vulgare subsp. vulgare OX=112509 PE=3 SV=1
PlainYeastBread.csv	WHT_A0A077RRF3	3661400000	3768400000	158500000	Glutaredoxin-dependent peroxiredoxin OS=Triticum aestivum OX=4565 GN=CFC21_041050 PE=3 SV=1
PlainYeastBread.csv	BRL_A0A8I6XBR3	349800000	4759500000	2039300000	Uncharacterized protein OS=Hordeum vulgare subsp. vulgare OX=112509 PE=3 SV=1
PlainYeastBread.csv	WHT_A0A3B6GRV7	349800000	4759500000	2039300000	Uncharacterized protein OS=Triticum aestivum OX=4565 GN=CFC21_046280 PE=3 SV=1
PlainYeastBread.csv	CS_P38616	17229000000	17258000000	14288000000	Protein YGP1 OS=Saccharomyces cerevisiae (strain ATCC 204508 / S288c) OX=559292 GN=YGP1 PE=1 SV=2
PlainYeastBread.csv	CS_P38998	13093000000	26124000000	6986600000	Saccharopine dehydrogenase [NAD(+) L-lysine-forming] OS=Saccharomyces cerevisiae (strain ATCC 204508 / S288c) OX=559292 GN=LYS1 PE=1 SV=3
PlainYeastBread.csv	SOY_O82560	5483800000	9706400000	7914900000	Glutamine synthetase cytosolic isozyme 2 OS=Glycine max OX=3847 PE=1 SV=1
PlainYeastBread.csv	WHT_A0A3B6H3L5	1334000000	7784900000	4425500000	Ubiquitin-fold modifier 1 OS=Triticum aestivum OX=4565 GN=CFC21_050468 PE=3 SV=1
PlainYeastBread.csv	BRL_A0A8I6XV79	1334000000	7784900000	4425500000	Ubiquitin-fold modifier 1 OS=Hordeum vulgare subsp. vulgare OX=112509 PE=3 SV=1
PlainYeastBread.csv	WHT_Q0GJJ2	487500000	16517000000	7188700000	11-beta-hydroxysteroid dehydrogenase-like protein OS=Triticum aestivum OX=4565 GN=HSD11BL PE=2 SV=1
PlainYeastBread.csv	WHT_A0A3B5ZWW3		0	2734500000	GH18 domain-containing protein OS=Triticum aestivum OX=4565 GN=CFC21_012566 PE=3 SV=1
PlainYeastBread.csv	WHT_A0A3B6KQS5	2617300000	25295000000	21966000000	Uncharacterized protein OS=Triticum aestivum OX=4565 GN=CFC21_068824 PE=4 SV=1
PlainYeastBread.csv	WHT_A0A3B6HY51	218240000	17476000000	3608100000	TOG domain-containing protein OS=Triticum aestivum OX=4565 PE=4 SV=1
PlainYeastBread.csv	WHT_Q9ZTZ1		5601500000	1235700000	FYVE-type domain-containing protein OS=Triticum aestivum OX=4565 GN=CFC21_007172 PE=2 SV=1
PlainYeastBread.csv	CS_P05739	23468000000	39007000000	18876000000	Large ribosomal subunit protein eL6B OS=Saccharomyces cerevisiae (strain ATCC 204508 / S288c) OX=559292 GN=RPL6B PE=1 SV=4
PlainYeastBread.csv	WHT_W5DZS4	8291900000	37166000000	1453000000	UDP-glucuronate decarboxylase OS=Triticum aestivum OX=4565 GN=CFC21_051794 PE=3 SV=1
PlainYeastBread.csv	BRL_F2D5Z0	8291900000	37166000000	1453000000	UDP-glucuronate decarboxylase OS=Hordeum vulgare subsp. vulgare OX=112509 PE=2 SV=1
PlainYeastBread.csv	CS_P28240	4013500000	9257700000	845290000	Isocitrate lyase OS=Saccharomyces cerevisiae (strain ATCC 204508 / S288c) OX=559292 GN=ICL1 PE=1 SV=1
PlainYeastBread.csv	WHT_A0A3B6KP84	2112700000	0		Cytochrome b-c1 complex subunit 7 OS=Triticum aestivum OX=4565 GN=CFC21_068359 PE=3 SV=1
PlainYeastBread.csv	BRL_A0A8I6WQM2	9015700000	9831400000	5167900000	Amine oxidase OS=Hordeum vulgare subsp. vulgare OX=112509 PE=3 SV=1
PlainYeastBread.csv	WHT_A0A3B6DFB5	9015700000	9831400000	5167900000	Amine oxidase OS=Triticum aestivum OX=4565 GN=CFC21_030460 PE=3 SV=1
PlainYeastBread.csv	WHT_A0A3B6FIG0	4862100000	7562500000	3178200000	Glutamate decarboxylase OS=Triticum aestivum OX=4565 GN=CFC21_039068 PE=3 SV=1
PlainYeastBread.csv	WHT_A0A3B6HMP8	15593000000	2781000000	11962000000	Tetratricopeptide repeat protein 38 OS=Triticum aestivum OX=4565 GN=CFC21_050877 PE=4 SV=1
PlainYeastBread.csv	WHT_A0A3B6JPZ5	15593000000	2781000000	11962000000	Uncharacterized protein OS=Triticum aestivum OX=4565 GN=CFC21_062980 PE=4 SV=1
PlainYeastBread.csv	WHT_A0A3B5YQY0	45115000000	55798000000	29481000000	Subtilisin-chymotrypsin inhibitor-2A OS=Triticum aestivum OX=4565 GN=CFC21_005052 PE=3 SV=1
PlainYeastBread.csv	SOY_Q7M1R5	0	59199000000	0	Superoxide dismutase [Cu-Zn] OS=Glycine max OX=3847 GN=SOD1 PE=3 SV=1
PlainYeastBread.csv	WHT_A0A3B6FRH4	2275600000	1958000000	5142700000	Beta-adaptin-like protein OS=Triticum aestivum OX=4565 GN=CFC21_041519 PE=3 SV=1
PlainYeastBread.csv	WHT_A0A3B5Z581	53594000000	35495000000	45977000000	Uncharacterized protein OS=Triticum aestivum OX=4565 GN=CFC21_009219 PE=4 SV=1
PlainYeastBread.csv	CS_P25373	899260000	1626100000	1929800000	Glutaredoxin-1 OS=Saccharomyces cerevisiae (strain ATCC 204508 / S288c) OX=559292 GN=GRX1 PE=1 SV=1
PlainYeastBread.csv	WHT_A0A3B6LR74	14539000000	2563900000	4538900000	Late embryogenesis abundant protein LEA-2 subgroup domain-containing protein OS=Triticum aestivum OX=4565 GN=CFC21_072778 PE=4 SV=1
PlainYeastBread.csv	BRL_F2EIB4	801800000	16523000000	4509500000	Predicted protein OS=Hordeum vulgare subsp. vulgare OX=112509 PE=2 SV=1
PlainYeastBread.csv	WHT_A0A3B6KK71	801800000	16523000000	4509500000	PCI domain-containing protein OS=Triticum aestivum OX=4565 GN=CFC21_067114 PE=3 SV=1
PlainYeastBread.csv	WHT_A0A3B6HN52	801800000	16523000000	4509500000	PCI domain-containing protein OS=Triticum aestivum OX=4565 PE=3 SV=1
PlainYeastBread.csv	BRL_A0A8I6Y3E0	801800000	16523000000	4509500000	PCI domain-containing protein OS=Hordeum vulgare subsp. vulgare OX=112509 PE=3 SV=1
PlainYeastBread.csv	CS_P01097	28289000000	26284000000	28971000000	F(1)-ATPase inhibitor IF(1) mitochondrial OS=Saccharomyces cerevisiae (strain ATCC 204508 / S288c) OX=559292 GN=INH1 PE=1 SV=2
PlainYeastBread.csv	WHT_A0A3B6DHH9	3571500000	6359200000	2280400000	Protein kinase domain-containing protein OS=Triticum aestivum OX=4565 PE=3 SV=1
PlainYeastBread.csv	BRL_A0A8I6WNB3	3571500000	6359200000	2280400000	Protein kinase domain-containing protein OS=Hordeum vulgare subsp. vulgare OX=112509 PE=3 SV=1
PlainYeastBread.csv	WHT_A0A3B6HYH7	44591000000	24739000000	3124700000	eRF1 domain-containing protein OS=Triticum aestivum OX=4565 GN=CFC21_053488 PE=3 SV=1
PlainYeastBread.csv	BRL_F2DCE8	44591000000	24739000000	3124700000	Predicted protein OS=Hordeum vulgare subsp. vulgare OX=112509 PE=2 SV=1
PlainYeastBread.csv	WHT_A0A3B6C361	44591000000	24739000000	3124700000	eRF1 domain-containing protein OS=Triticum aestivum OX=4565 GN=CFC21_022682 PE=3 SV=1
PlainYeastBread.csv	BRL_F2CRZ5	44591000000	24739000000	3124700000	Predicted protein OS=Hordeum vulgare subsp. vulgare OX=112509 PE=2 SV=1
PlainYeastBread.csv	BRL_M0UNX1	44591000000	24739000000	3124700000	eRF1 domain-containing protein OS=Hordeum vulgare subsp. vulgare OX=112509 PE=3 SV=1
PlainYeastBread.csv	BRL_M0W8S9	44591000000	24739000000	3124700000	eRF1 domain-containing protein OS=Hordeum vulgare subsp. vulgare OX=112509 PE=3 SV=1
PlainYeastBread.csv	WHT_A0A3B6EQE5	44591000000	24739000000	3124700000	eRF1 domain-containing protein OS=Triticum aestivum OX=4565 GN=CFC21_038081 PE=3 SV=1
PlainYeastBread.csv	CS_P38075		9672400000	427850000	Pyridoxamine 5'-phosphate oxidase OS=Saccharomyces cerevisiae (strain ATCC 204508 / S288c) OX=559292 GN=PDX3 PE=1 SV=1
PlainYeastBread.csv	WHT_A0A3B6ASD8		857800000	0	Peroxidase OS=Triticum aestivum OX=4565 GN=CFC21_015417 PE=3 SV=1
PlainYeastBread.csv	SOY_I1LX80	7384900000		1170300000	UBC core domain-containing protein OS=Glycine max OX=3847 GN=GLYMA_13G040500 PE=3 SV=1
PlainYeastBread.csv	SOY_K7MQ19	7384900000		1170300000	UBC core domain-containing protein OS=Glycine max OX=3847 GN=100527105 PE=3 SV=1
PlainYeastBread.csv	BRL_F2DMN9	7384900000		1170300000	Predicted protein OS=Hordeum vulgare subsp. vulgare OX=112509 PE=2 SV=1
PlainYeastBread.csv	SOY_I1KWZ3	7384900000		1170300000	UBC core domain-containing protein OS=Glycine max OX=3847 GN=100777678 PE=3 SV=1
PlainYeastBread.csv	WHT_Q5XUV4	7384900000		1170300000	Ubiquitin-conjugating enzyme OS=Triticum aestivum OX=4565 GN=CFC21_019876 PE=2 SV=1
PlainYeastBread.csv	BRL_A0A287LWH7	7384900000		1170300000	UBC core domain-containing protein OS=Hordeum vulgare subsp. vulgare OX=112509 PE=3 SV=1
PlainYeastBread.csv	WHT_W5A4C1	7384900000		1170300000	UBC core domain-containing protein OS=Triticum aestivum OX=4565 GN=CFC21_012758 PE=3 SV=1
PlainYeastBread.csv	SOY_K7MTV5	7384900000		1170300000	UBC core domain-containing protein OS=Glycine max OX=3847 GN=100802703 PE=3 SV=1
PlainYeastBread.csv	CS_P37292		2138800000	0	Serine hydroxymethyltransferase mitochondrial OS=Saccharomyces cerevisiae (strain ATCC 204508 / S288c) OX=559292 GN=SHM1 PE=1 SV=2
PlainYeastBread.csv	WHT_A0A3B6ECW9	7465300000	24315000000	2629700000	Uncharacterized protein OS=Triticum aestivum OX=4565 GN=CFC21_034603 PE=4 SV=1
PlainYeastBread.csv	CS_P32478	2489700000	0	20863000000	Cell wall mannoprotein HSP150 OS=Saccharomyces cerevisiae (strain ATCC 204508 / S288c) OX=559292 GN=HSP150 PE=1 SV=2
PlainYeastBread.csv	WHT_A0A3B5Y052	9425900000	24269000000	19882000000	Knottin scorpion toxin-like domain-containing protein OS=Triticum aestivum OX=4565 PE=4 SV=1
PlainYeastBread.csv	WHT_A0A3B6GSV9	0	13357000000	3757300000	Ubiquitin carboxyl-terminal hydrolase OS=Triticum aestivum OX=4565 GN=CFC21_046392 PE=3 SV=1
PlainYeastBread.csv	BRL_A0A8I6WQ13	0	13357000000	3757300000	Ubiquitin carboxyl-terminal hydrolase OS=Hordeum vulgare subsp. vulgare OX=112509 PE=3 SV=1
PlainYeastBread.csv	BRL_F2D4I8	20235000000	45589000000	6503400000	Eukaryotic translation initiation factor 3 subunit F OS=Hordeum vulgare subsp. vulgare OX=112509 PE=2 SV=1
PlainYeastBread.csv	WHT_A0A3B6QAR8	20235000000	45589000000	6503400000	Eukaryotic translation initiation factor 3 subunit F OS=Triticum aestivum OX=4565 GN=CFC21_091473 PE=3 SV=1
PlainYeastBread.csv	CS_P05319	82315000000	55994000000	30226000000	Large ribosomal subunit protein P2A OS=Saccharomyces cerevisiae (strain ATCC 204508 / S288c) OX=559292 GN=RPP2A PE=1 SV=1
PlainYeastBread.csv	WHT_A0A3B6FRG3		3781300000	591660000	Neutral ceramidase OS=Triticum aestivum OX=4565 GN=CFC21_041510 PE=3 SV=1
PlainYeastBread.csv	BRL_F2DC68		3781300000	591660000	Neutral ceramidase OS=Hordeum vulgare subsp. vulgare OX=112509 PE=2 SV=1
PlainYeastBread.csv	CS_P36059	6820400000	10109000000	2877400000	ATP-dependent (S)-NAD(P)H-hydrate dehydratase OS=Saccharomyces cerevisiae (strain ATCC 204508 / S288c) OX=559292 GN=NNR2 PE=1 SV=1
PlainYeastBread.csv	SOY_I1LGR6		0	0	leucine--tRNA ligase OS=Glycine max OX=3847 GN=100777060 PE=3 SV=1
PlainYeastBread.csv	WHT_A0A3B6NTF1	1831900000		1414300000	ATP synthase subunit O mitochondrial OS=Triticum aestivum OX=4565 GN=CFC21_084146 PE=3 SV=1
PlainYeastBread.csv	BRL_F2D1U7	2878900000	10237000000	0	UMP-CMP kinase OS=Hordeum vulgare subsp. vulgare OX=112509 PE=2 SV=1
PlainYeastBread.csv	WHT_A0A0C4BIZ6	2878900000	10237000000	0	UMP-CMP kinase OS=Triticum aestivum OX=4565 GN=CFC21_028682 PE=3 SV=1
PlainYeastBread.csv	CS_P36112	1153900000	16117000000		MICOS complex subunit MIC60 OS=Saccharomyces cerevisiae (strain ATCC 204508 / S288c) OX=559292 GN=MIC60 PE=1 SV=1
PlainYeastBread.csv	BRL_F2CZL7	0	1700300000	14863000000	Eukaryotic translation initiation factor 4C OS=Hordeum vulgare subsp. vulgare OX=112509 PE=2 SV=1
PlainYeastBread.csv	WHT_W5I4R7	0	1700300000	14863000000	Eukaryotic translation initiation factor 4C OS=Triticum aestivum OX=4565 GN=CFC21_103572 PE=3 SV=1
PlainYeastBread.csv	WHT_A0A3B6D910		4840600000	3989600000	Uncharacterized protein OS=Triticum aestivum OX=4565 GN=CFC21_028509 PE=4 SV=1
PlainYeastBread.csv	SOY_I1KV87		30067000000		Ig-like domain-containing protein OS=Glycine max OX=3847 GN=100816539 PE=4 SV=1
PlainYeastBread.csv	BRL_A0A287TFN9		19343000000	2425300000	Uncharacterized protein OS=Hordeum vulgare subsp. vulgare OX=112509 PE=4 SV=1
PlainYeastBread.csv	WHT_A0A3B6PHM9		19343000000	2406700000	UBA domain-containing protein OS=Triticum aestivum OX=4565 GN=CFC21_087051 PE=4 SV=1
PlainYeastBread.csv	WHT_A0A1D5V289	0	0		Genome assembly chromosome: II OS=Triticum aestivum OX=4565 GN=CAMPLR22A2D_LOCUS148 PE=4 SV=1
PlainYeastBread.csv	WHT_A0A3B6BYY0	0	0		CBS domain-containing protein OS=Triticum aestivum OX=4565 GN=CFC21_020475 PE=4 SV=1
PlainYeastBread.csv	BRL_F2DY46	0	0		Predicted protein OS=Hordeum vulgare subsp. vulgare OX=112509 PE=2 SV=1
PlainYeastBread.csv	CS_P00931	0	0	0	Tryptophan synthase OS=Saccharomyces cerevisiae (strain ATCC 204508 / S288c) OX=559292 GN=TRP5 PE=1 SV=1
PlainYeastBread.csv	WHT_A0A3B6QI93	0	26936000000	14861000000	Uncharacterized protein OS=Triticum aestivum OX=4565 GN=CFC21_063328 PE=4 SV=1
PlainYeastBread.csv	BRL_F2EB17	0	26936000000	14861000000	Predicted protein OS=Hordeum vulgare subsp. vulgare OX=112509 PE=2 SV=1
PlainYeastBread.csv	CS_Q05775	7361200000	10252000000	7855200000	Eukaryotic translation initiation factor 3 subunit J OS=Saccharomyces cerevisiae (strain ATCC 204508 / S288c) OX=559292 GN=HCR1 PE=1 SV=1
PlainYeastBread.csv	BRL_M0X5W2	8129300000	25752000000	13754000000	HMA domain-containing protein OS=Hordeum vulgare subsp. vulgare OX=112509 PE=4 SV=1
PlainYeastBread.csv	WHT_A0A3B6RHU9	8129300000	25752000000	13754000000	HMA domain-containing protein OS=Triticum aestivum OX=4565 GN=CFC21_098424 PE=4 SV=1
PlainYeastBread.csv	WHT_A0A3B6JME6	101200000	2916900000		Imidazole glycerol phosphate synthase hisHF OS=Triticum aestivum OX=4565 GN=CFC21_062247 PE=3 SV=1
PlainYeastBread.csv	BRL_A0A8I6X374	101200000	2916900000		Imidazole glycerol phosphate synthase hisHF OS=Hordeum vulgare subsp. vulgare OX=112509 PE=3 SV=1
PlainYeastBread.csv	WHT_A0A3B6PP36	1222800000	2388800000	1304500000	Uncharacterized protein OS=Triticum aestivum OX=4565 PE=4 SV=1
PlainYeastBread.csv	CS_P80210	0	8569600000		Adenylosuccinate synthetase OS=Saccharomyces cerevisiae (strain ATCC 204508 / S288c) OX=559292 GN=ADE12 PE=1 SV=3
PlainYeastBread.csv	CS_P32463		0	0	Acyl carrier protein mitochondrial OS=Saccharomyces cerevisiae (strain ATCC 204508 / S288c) OX=559292 GN=ACP1 PE=1 SV=1
PlainYeastBread.csv	WHT_A0A3B6HW61		3112600000	0	Eukaryotic translation initiation factor 3 subunit I OS=Triticum aestivum OX=4565 GN=CFC21_052473 PE=3 SV=1
PlainYeastBread.csv	WHT_A0A3B5Y2G4		0		chitinase OS=Triticum aestivum OX=4565 PE=4 SV=1
PlainYeastBread.csv	WHT_P81496	0	0	41013000000	Allergen C-C (Fragment) OS=Triticum aestivum OX=4565 PE=1 SV=1
PlainYeastBread.csv	BRL_A0A8I7B2E8	0	5365100000		alanine transaminase OS=Hordeum vulgare subsp. vulgare OX=112509 PE=3 SV=1
PlainYeastBread.csv	WHT_A0A3B6C2J0	0	5365100000		alanine transaminase OS=Triticum aestivum OX=4565 GN=CFC21_022466 PE=3 SV=1
PlainYeastBread.csv	WHT_A0A3B5Z4H5	96558000000	20602000000	107390000000	Uncharacterized protein OS=Triticum aestivum OX=4565 GN=CFC21_009000 PE=3 SV=1
PlainYeastBread.csv	WHT_A0A3B5Y658	96558000000	20602000000	107390000000	Uncharacterized protein OS=Triticum aestivum OX=4565 PE=3 SV=1
PlainYeastBread.csv	WHT_A0A3B6QGE7	0			RanBP2-type domain-containing protein OS=Triticum aestivum OX=4565 GN=CFC21_092413 PE=4 SV=1
PlainYeastBread.csv	BRL_M0UTV8	0			RanBP2-type domain-containing protein OS=Hordeum vulgare subsp. vulgare OX=112509 PE=4 SV=1
PlainYeastBread.csv	BRL_M0VH55			27400000	Bifunctional inhibitor/plant lipid transfer protein/seed storage helical domain-containing protein OS=Hordeum vulgare subsp. vulgare OX=112509 PE=4 SV=1
PlainYeastBread.csv	CS_P21576	1370300000	2012500000	629040000	Vacuolar protein sorting-associated protein 1 OS=Saccharomyces cerevisiae (strain ATCC 204508 / S288c) OX=559292 GN=VPS1 PE=1 SV=2
PlainYeastBread.csv	CS_P35176	12675000000	8183900000	3553200000	Peptidyl-prolyl cis-trans isomerase D OS=Saccharomyces cerevisiae (strain ATCC 204508 / S288c) OX=559292 GN=CPR5 PE=1 SV=1
PlainYeastBread.csv	WHT_A0A3B6MLB1		1082200000	4072100000	Hcy-binding domain-containing protein OS=Triticum aestivum OX=4565 GN=CFC21_076026 PE=4 SV=1
PlainYeastBread.csv	BRL_A0A8I6Y746	6437800000	11122000000	3943100000	Macro domain-containing protein OS=Hordeum vulgare subsp. vulgare OX=112509 PE=4 SV=1
PlainYeastBread.csv	CS_P36046	482010000000	1737500000	0	Mitochondrial intermembrane space import and assembly protein 40 OS=Saccharomyces cerevisiae (strain ATCC 204508 / S288c) OX=559292 GN=MIA40 PE=1 SV=2
PlainYeastBread.csv	WHT_A0A341Z8D2	3467500000	1482000000	6516400000	4-hydroxy-4-methyl-2-oxoglutarate aldolase OS=Triticum aestivum OX=4565 GN=CFC21_106097 PE=3 SV=1
PlainYeastBread.csv	BRL_A0A8I7BJ44		2379100000	0	Activator of Hsp90 ATPase AHSA1-like N-terminal domain-containing protein OS=Hordeum vulgare subsp. vulgare OX=112509 PE=3 SV=1
PlainYeastBread.csv	CS_P80235	5350900000	7645900000	2485100000	Putative mitochondrial carnitine O-acetyltransferase OS=Saccharomyces cerevisiae (strain ATCC 204508 / S288c) OX=559292 GN=YAT1 PE=1 SV=2
PlainYeastBread.csv	WHT_A0A3B6LW86	0			Mitochondrial Rho GTPase OS=Triticum aestivum OX=4565 PE=3 SV=1
PlainYeastBread.csv	BRL_M0XN08	0			Mitochondrial Rho GTPase OS=Hordeum vulgare subsp. vulgare OX=112509 PE=3 SV=1
PlainYeastBread.csv	CS_P31787	8381500000			Acyl-CoA-binding protein OS=Saccharomyces cerevisiae (strain ATCC 204508 / S288c) OX=559292 GN=ACB1 PE=1 SV=3
PlainYeastBread.csv	WHT_A0A3B6IVS6	0	5884300000		cysteine--tRNA ligase OS=Triticum aestivum OX=4565 PE=3 SV=1
PlainYeastBread.csv	BRL_F2E5S3	0	5884300000		cysteine--tRNA ligase OS=Hordeum vulgare subsp. vulgare OX=112509 PE=2 SV=1
PlainYeastBread.csv	WHT_A0A3B6RS43	7512100000	6461500000	0	Uncharacterized protein OS=Triticum aestivum OX=4565 GN=CFC21_100422 PE=4 SV=1
PlainYeastBread.csv	BRL_A0A8I6XD03	735410000	4551700000		MGS-like domain-containing protein OS=Hordeum vulgare subsp. vulgare OX=112509 PE=3 SV=1
PlainYeastBread.csv	WHT_A0A3B6ETK4	735410000	4551700000		MGS-like domain-containing protein OS=Triticum aestivum OX=4565 GN=CFC21_037892 PE=3 SV=1
PlainYeastBread.csv	WHT_A0A3B5ZX14	735410000	4551700000		MGS-like domain-containing protein OS=Triticum aestivum OX=4565 GN=CFC21_012607 PE=3 SV=1
PlainYeastBread.csv	WHT_A0A3B6NQ90		3269800000	1258300000	glycerophosphodiester phosphodiesterase OS=Triticum aestivum OX=4565 GN=CFC21_083444 PE=4 SV=1
PlainYeastBread.csv	CS_P35844	2512500000	262100000	1638800000	Oxysterol-binding protein homolog 4 OS=Saccharomyces cerevisiae (strain ATCC 204508 / S288c) OX=559292 GN=KES1 PE=1 SV=1
PlainYeastBread.csv	BRL_M0XSP9	4110900000	0	3933200000	Succinate-semialdehyde dehydrogenase OS=Hordeum vulgare subsp. vulgare OX=112509 PE=3 SV=1
PlainYeastBread.csv	SOY_A0A0R4J5H1	4110900000	0	3933200000	Succinate-semialdehyde dehydrogenase OS=Glycine max OX=3847 GN=100808318 PE=3 SV=1
PlainYeastBread.csv	WHT_A0A3B6QCZ1	4110900000	0	3933200000	Succinate-semialdehyde dehydrogenase OS=Triticum aestivum OX=4565 GN=CFC21_092184 PE=3 SV=1
PlainYeastBread.csv	SOY_A0A0R0GJV8	0		8259700000	PCI domain-containing protein OS=Glycine max OX=3847 GN=GLYMA_14G139600 PE=3 SV=1
PlainYeastBread.csv	WHT_A0A3B6KL22	0	0		Uridine kinase OS=Triticum aestivum OX=4565 PE=3 SV=1
PlainYeastBread.csv	BRL_A0A8I6YI46	0	0		Uridine kinase OS=Hordeum vulgare subsp. vulgare OX=112509 PE=3 SV=1
PlainYeastBread.csv	WHT_A0A3B6MUN7	0	0		Uridine kinase OS=Triticum aestivum OX=4565 GN=CFC21_078403 PE=3 SV=1
PlainYeastBread.csv	WHT_A0A3B6GVJ6	785320000	0		Hyaluronan/mRNA-binding protein domain-containing protein OS=Triticum aestivum OX=4565 GN=CFC21_048037 PE=4 SV=1
PlainYeastBread.csv	WHT_A0A3B6NIJ7	10244000000	8355600000	4431100000	Protein disulfide-isomerase OS=Triticum aestivum OX=4565 PE=3 SV=1
PlainYeastBread.csv	BRL_A0A8I6Y0S0	10244000000	8355600000	4431100000	protein disulfide-isomerase OS=Hordeum vulgare subsp. vulgare OX=112509 PE=3 SV=1
PlainYeastBread.csv	WHT_A0A077S4K0	10244000000	8355600000	4431100000	Protein disulfide-isomerase OS=Triticum aestivum OX=4565 GN=CFC21_044258 PE=3 SV=1
PlainYeastBread.csv	WHT_A0A3B6QA65	10244000000	8355600000	4431100000	Protein disulfide-isomerase OS=Triticum aestivum OX=4565 PE=3 SV=1
PlainYeastBread.csv	WHT_A0A3B6PFF3	10244000000	8355600000	4431100000	Protein disulfide-isomerase OS=Triticum aestivum OX=4565 GN=CFC21_085745 PE=3 SV=1
PlainYeastBread.csv	CS_P09232	7683500000	8712800000	0	Cerevisin OS=Saccharomyces cerevisiae (strain ATCC 204508 / S288c) OX=559292 GN=PRB1 PE=1 SV=1
PlainYeastBread.csv	WHT_A0A3B6FNB6	198300000	0	0	Tryptophan synthase beta chain-like PALP domain-containing protein OS=Triticum aestivum OX=4565 GN=CFC21_041868 PE=3 SV=1
PlainYeastBread.csv	BRL_F2CXN7	198300000	0	0	Predicted protein OS=Hordeum vulgare subsp. vulgare OX=112509 PE=2 SV=1
PlainYeastBread.csv	WHT_A0A3B6AY89	0	5235400000	0	MD-2-related lipid-recognition domain-containing protein OS=Triticum aestivum OX=4565 GN=CFC21_016837 PE=4 SV=1
PlainYeastBread.csv	WHT_A0A3B6CHF3	1349200000	5070200000	1668900000	NADP-dependent oxidoreductase domain-containing protein OS=Triticum aestivum OX=4565 GN=CFC21_026055 PE=3 SV=1
PlainYeastBread.csv	WHT_A0A3B6C7Y4	1349200000	5070200000	1668900000	NADP-dependent oxidoreductase domain-containing protein OS=Triticum aestivum OX=4565 GN=CFC21_023929 PE=3 SV=1
PlainYeastBread.csv	CS_P32939	0	0		Ypt/Rab-type GTPase YPT7 OS=Saccharomyces cerevisiae (strain ATCC 204508 / S288c) OX=559292 GN=YPT7 PE=1 SV=1
PlainYeastBread.csv	BRL_F2DB39		5399800000	4216200000	U6 snRNA-associated Sm-like protein LSm4 OS=Hordeum vulgare subsp. vulgare OX=112509 GN=LSM4 PE=2 SV=1
PlainYeastBread.csv	WHT_Q84N29		17837000000		Probable non-specific lipid-transfer protein 3 OS=Triticum aestivum OX=4565 GN=LTP3 PE=2 SV=1
PlainYeastBread.csv	BRL_A0A8I6XQT6		17837000000		Non-specific lipid-transfer protein OS=Hordeum vulgare subsp. vulgare OX=112509 PE=3 SV=1
PlainYeastBread.csv	SOY_P19594		0	966670000	2S seed storage albumin protein OS=Glycine max OX=3847 PE=1 SV=2
PlainYeastBread.csv	WHT_A0A3B6AWD3		15017000000	3675900000	protein-serine/threonine phosphatase OS=Triticum aestivum OX=4565 GN=CFC21_016564 PE=4 SV=1
PlainYeastBread.csv	CS_Q12306	0	17024000000		Ubiquitin-like protein SMT3 OS=Saccharomyces cerevisiae (strain ATCC 204508 / S288c) OX=559292 GN=SMT3 PE=1 SV=1
PlainYeastBread.csv	CS_Q04336	0		816440000	Uncharacterized protein YMR196W OS=Saccharomyces cerevisiae (strain ATCC 204508 / S288c) OX=559292 GN=YMR196W PE=1 SV=1
PlainYeastBread.csv	WHT_A0A3B6TSC8		1789600000		indole-3-glycerol-phosphate synthase OS=Triticum aestivum OX=4565 GN=CFC21_111505 PE=4 SV=1
PlainYeastBread.csv	WHT_A0A3B6SK72		1789600000		indole-3-glycerol-phosphate synthase OS=Triticum aestivum OX=4565 PE=3 SV=1
PlainYeastBread.csv	BRL_F2DSH0		1789600000		indole-3-glycerol-phosphate synthase OS=Hordeum vulgare subsp. vulgare OX=112509 PE=2 SV=1
PlainYeastBread.csv	WHT_A0A3B5YZJ0	3598300000	43345000000	21235000000	RRM domain-containing protein OS=Triticum aestivum OX=4565 GN=CFC21_007542 PE=4 SV=1
PlainYeastBread.csv	CS_Q12123	10695000000			Inactive diphosphatase DCS2 OS=Saccharomyces cerevisiae (strain ATCC 204508 / S288c) OX=559292 GN=DCS2 PE=1 SV=3
PlainYeastBread.csv	CS_Q08971	1805100000	5519400000	9103400000	Protein PBDC1 homolog OS=Saccharomyces cerevisiae (strain ATCC 204508 / S288c) OX=559292 GN=YPL225W PE=1 SV=1
PlainYeastBread.csv	WHT_A0A3B5Z682	35407000000	4043000000	19034000000	Nucleoside diphosphate kinase OS=Triticum aestivum OX=4565 GN=CFC21_009544 PE=3 SV=1
PlainYeastBread.csv	BRL_A0A8I6WJL7	35407000000	4043000000	19034000000	Nucleoside diphosphate kinase OS=Hordeum vulgare subsp. vulgare OX=112509 PE=3 SV=1
PlainYeastBread.csv	CS_Q03161	0	3322800000	1842300000	Glucose-6-phosphate 1-epimerase OS=Saccharomyces cerevisiae (strain ATCC 204508 / S288c) OX=559292 GN=YMR099C PE=1 SV=1
PlainYeastBread.csv	WHT_A0A3B6B985	12246000000	27571000000	11608000000	Knottin scorpion toxin-like domain-containing protein OS=Triticum aestivum OX=4565 GN=CFC21_020295 PE=4 SV=1
PlainYeastBread.csv	BRL_A0A8I6YTP1	771790000	12897000000	586360000	Uncharacterized protein OS=Hordeum vulgare subsp. vulgare OX=112509 PE=4 SV=1
PlainYeastBread.csv	WHT_A0A3B6MUK2	771790000	12897000000	586360000	GRAM domain-containing protein OS=Triticum aestivum OX=4565 GN=CFC21_078513 PE=4 SV=1
PlainYeastBread.csv	CS_P38911	0	2856300000		Peptidyl-prolyl cis-trans isomerase OS=Saccharomyces cerevisiae (strain ATCC 204508 / S288c) OX=559292 GN=FPR3 PE=1 SV=2
PlainYeastBread.csv	CS_P40024		915130000	2284400000	ABC transporter ATP-binding protein ARB1 OS=Saccharomyces cerevisiae (strain ATCC 204508 / S288c) OX=559292 GN=ARB1 PE=1 SV=1
PlainYeastBread.csv	WHT_A0A3B6N1X2	0	1744700000	578130000	Fumarylacetoacetase-like C-terminal domain-containing protein OS=Triticum aestivum OX=4565 PE=3 SV=1
PlainYeastBread.csv	WHT_A0A3B6KJB0	1314800000	2646900000	0	alpha-L-fucosidase OS=Triticum aestivum OX=4565 GN=CFC21_066833 PE=3 SV=1
PlainYeastBread.csv	CS_P17423		1621500000	0	Homoserine kinase OS=Saccharomyces cerevisiae (strain ATCC 204508 / S288c) OX=559292 GN=THR1 PE=1 SV=4
PlainYeastBread.csv	CS_P36041	2051500000	2737100000		Protein EAP1 OS=Saccharomyces cerevisiae (strain ATCC 204508 / S288c) OX=559292 GN=EAP1 PE=1 SV=1
PlainYeastBread.csv	BRL_A0A8I7B160		9954800000	1422100000	Phospholipid/glycerol acyltransferase domain-containing protein OS=Hordeum vulgare subsp. vulgare OX=112509 PE=3 SV=1
PlainYeastBread.csv	WHT_A0A3B5Y117		9954800000	1422100000	Phospholipid/glycerol acyltransferase domain-containing protein OS=Triticum aestivum OX=4565 PE=3 SV=1
PlainYeastBread.csv	CS_P32775		3360200000		1 4-alpha-glucan-branching enzyme OS=Saccharomyces cerevisiae (strain ATCC 204508 / S288c) OX=559292 GN=GLC3 PE=1 SV=2
PlainYeastBread.csv	BRL_F2DL85	4174000000	66305000000	18987000000	Ribosomal protein L15 OS=Hordeum vulgare subsp. vulgare OX=112509 PE=2 SV=1
PlainYeastBread.csv	WHT_A0A3B6AVY4	4174000000	66305000000	18987000000	Ribosomal protein L15 OS=Triticum aestivum OX=4565 GN=CFC21_016619 PE=3 SV=1
PlainYeastBread.csv	WHT_A0A3B6NLG8	231800000	4034800000	1219700000	methenyltetrahydrofolate cyclohydrolase OS=Triticum aestivum OX=4565 GN=CFC21_082083 PE=3 SV=1
PlainYeastBread.csv	BRL_A0A8I6XQX4	231800000	4034800000	1219700000	methenyltetrahydrofolate cyclohydrolase OS=Hordeum vulgare subsp. vulgare OX=112509 PE=3 SV=1
PlainYeastBread.csv	WHT_A0A3B6EAK2		3428500000	251300000	threonine--tRNA ligase OS=Triticum aestivum OX=4565 GN=CFC21_033896 PE=3 SV=1
PlainYeastBread.csv	BRL_A0A8I6X2M0		3428500000	251300000	threonine--tRNA ligase OS=Hordeum vulgare subsp. vulgare OX=112509 PE=3 SV=1
PlainYeastBread.csv	CS_P15646		8204900000	663910000	rRNA 2'-O-methyltransferase fibrillarin OS=Saccharomyces cerevisiae (strain ATCC 204508 / S288c) OX=559292 GN=NOP1 PE=1 SV=1
PlainYeastBread.csv	WHT_A0A3B6LYJ8	5887200000	27846000000	21502000000	NAD-dependent epimerase/dehydratase domain-containing protein OS=Triticum aestivum OX=4565 GN=CFC21_075080 PE=4 SV=1
PlainYeastBread.csv	WHT_A0A3B6N2Z9	5887200000	27846000000	21502000000	NAD-dependent epimerase/dehydratase domain-containing protein OS=Triticum aestivum OX=4565 GN=CFC21_081020 PE=4 SV=1
PlainYeastBread.csv	BRL_A0A8I6XPK4	7673500000	23359000000	22454000000	tryptophan--tRNA ligase OS=Hordeum vulgare subsp. vulgare OX=112509 PE=3 SV=1
PlainYeastBread.csv	WHT_A0A3B6ELU1		1777400000		glutamate synthase (NADH) OS=Triticum aestivum OX=4565 PE=3 SV=1
PlainYeastBread.csv	BRL_A0A8I6XND6		1777400000		glutamate synthase (NADH) OS=Hordeum vulgare subsp. vulgare OX=112509 PE=3 SV=1
PlainYeastBread.csv	CS_P25491	0	673600000	2676300000	Mitochondrial protein import protein MAS5 OS=Saccharomyces cerevisiae (strain ATCC 204508 / S288c) OX=559292 GN=YDJ1 PE=1 SV=1
PlainYeastBread.csv	CS_Q04067	2080200000	1178400000	0	Eukaryotic translation initiation factor 3 subunit G OS=Saccharomyces cerevisiae (strain ATCC 204508 / S288c) OX=559292 GN=TIF35 PE=1 SV=1
PlainYeastBread.csv	WHT_A0A3B6RMI0		3768600000		3-hydroxyisobutyryl-CoA hydrolase OS=Triticum aestivum OX=4565 GN=CFC21_098780 PE=3 SV=1
PlainYeastBread.csv	BRL_F2CQQ1		3639900000		3-deoxy-8-phosphooctulonate synthase OS=Hordeum vulgare subsp. vulgare OX=112509 PE=2 SV=1
PlainYeastBread.csv	WHT_A0A3B6C2H6		3639900000		3-deoxy-8-phosphooctulonate synthase OS=Triticum aestivum OX=4565 GN=CFC21_021656 PE=3 SV=1
PlainYeastBread.csv	BRL_A0A8I6XIF6		0		S-methyl-5-thioribose kinase OS=Hordeum vulgare subsp. vulgare OX=112509 PE=3 SV=1
PlainYeastBread.csv	WHT_A0A2X0U275		0		S-methyl-5-thioribose kinase OS=Triticum aestivum OX=4565 GN=CAMPLR22A2D_LOCUS5375 PE=3 SV=1
PlainYeastBread.csv	WHT_A0A3B6LVR5	0	0	0	RRM domain-containing protein OS=Triticum aestivum OX=4565 GN=CFC21_074278 PE=4 SV=1
PlainYeastBread.csv	WHT_A0A3B6KQ24	0	0	0	RRM domain-containing protein OS=Triticum aestivum OX=4565 GN=CFC21_068399 PE=4 SV=1
PlainYeastBread.csv	WHT_A0A3B6TRC2	4747700000		3654800000	UBX domain-containing protein OS=Triticum aestivum OX=4565 PE=4 SV=1
PlainYeastBread.csv	BRL_A0A8I6YME5	4747700000		3654800000	UBX domain-containing protein OS=Hordeum vulgare subsp. vulgare OX=112509 PE=4 SV=1
PlainYeastBread.csv	CS_P33331	0	12794000000	0	Nuclear transport factor 2 OS=Saccharomyces cerevisiae (strain ATCC 204508 / S288c) OX=559292 GN=NTF2 PE=1 SV=2
PlainYeastBread.csv	WHT_A0A3B6GQC0	33500000	6298200000	181600000	Vesicle-fusing ATPase OS=Triticum aestivum OX=4565 GN=CFC21_045659 PE=3 SV=1
PlainYeastBread.csv	WHT_A0A3B6N0E9		3889900000		Glucose-1-phosphate adenylyltransferase OS=Triticum aestivum OX=4565 GN=CFC21_080431 PE=2 SV=1
PlainYeastBread.csv	CS_P47120	420200000	5810900000	3623400000	Deoxyhypusine hydroxylase OS=Saccharomyces cerevisiae (strain ATCC 204508 / S288c) OX=559292 GN=LIA1 PE=1 SV=1
PlainYeastBread.csv	WHT_A0A3B5ZR06	330500000	396300000	0	UspA domain-containing protein OS=Triticum aestivum OX=4565 GN=CFC21_010756 PE=4 SV=1
PlainYeastBread.csv	BRL_D2XV68	330500000	396300000	0	Predicted protein OS=Hordeum vulgare subsp. vulgare OX=112509 PE=2 SV=1
PlainYeastBread.csv	WHT_A0A3B5YUS5	330500000	396300000	0	UspA domain-containing protein OS=Triticum aestivum OX=4565 GN=CFC21_005907 PE=4 SV=1
PlainYeastBread.csv	BRL_A0A8I6X6U8	2018500000	5280200000		Dynamin-related protein 5A OS=Hordeum vulgare subsp. vulgare OX=112509 PE=3 SV=1
PlainYeastBread.csv	BRL_A0A8I7B2K7	11912000000	646750000		SEC7 domain-containing protein OS=Hordeum vulgare subsp. vulgare OX=112509 PE=4 SV=1
PlainYeastBread.csv	CS_P40053		2659300000	6101800000	Altered inheritance of mitochondria protein 9 mitochondrial OS=Saccharomyces cerevisiae (strain ATCC 204508 / S288c) OX=559292 GN=AIM9 PE=1 SV=1
PlainYeastBread.csv	WHT_A0A3B6EQI0	0			AP-4 complex subunit epsilon OS=Triticum aestivum OX=4565 GN=CFC21_037539 PE=3 SV=1
PlainYeastBread.csv	BRL_A0A8I6X5V6	0			AP-4 complex subunit epsilon OS=Hordeum vulgare subsp. vulgare OX=112509 PE=3 SV=1
PlainYeastBread.csv	WHT_A0A3B6C5B4	3589900000	10421000000	2786200000	ubiquitinyl hydrolase 1 OS=Triticum aestivum OX=4565 GN=CFC21_023235 PE=3 SV=1
PlainYeastBread.csv	BRL_A0A8I7B2U1	3589900000	10421000000	2786200000	ubiquitinyl hydrolase 1 OS=Hordeum vulgare subsp. vulgare OX=112509 PE=3 SV=1
PlainYeastBread.csv	WHT_A0A3B6B5C9		3639800000		Gamma-soluble NSF attachment protein OS=Triticum aestivum OX=4565 GN=CFC21_005454 PE=3 SV=1
PlainYeastBread.csv	BRL_A0A8I6XCC9		3639800000		Gamma-soluble NSF attachment protein OS=Hordeum vulgare subsp. vulgare OX=112509 PE=3 SV=1
PlainYeastBread.csv	WHT_A0A3B6JDE0	0	0		F-box associated domain-containing protein OS=Triticum aestivum OX=4565 GN=CFC21_060109 PE=4 SV=1
PlainYeastBread.csv	WHT_A0A1D6SDJ5	0	0		Uncharacterized protein OS=Triticum aestivum OX=4565 GN=CFC21_104836 PE=4 SV=1
PlainYeastBread.csv	BRL_F2ED94	2741400000	5451400000	2709800000	phenylalanine--tRNA ligase OS=Hordeum vulgare subsp. vulgare OX=112509 PE=2 SV=1
PlainYeastBread.csv	WHT_A0A3B5YX86	2741400000	5451400000	2709800000	phenylalanine--tRNA ligase OS=Triticum aestivum OX=4565 PE=3 SV=1
PlainYeastBread.csv	WHT_A0A3B6KEH3	2741400000	5451400000	2709800000	phenylalanine--tRNA ligase OS=Triticum aestivum OX=4565 GN=CFC21_064773 PE=3 SV=1
PlainYeastBread.csv	CS_P38249	1892600000		0	Eukaryotic translation initiation factor 3 subunit A OS=Saccharomyces cerevisiae (strain ATCC 204508 / S288c) OX=559292 GN=RPG1 PE=1 SV=1
PlainYeastBread.csv	SOY_Q42795	0	0	1564600000	Beta-amylase OS=Glycine max OX=3847 GN=547931 PE=1 SV=1
PlainYeastBread.csv	CS_P25374	1537500000	17056000000	477550000	Cysteine desulfurase mitochondrial OS=Saccharomyces cerevisiae (strain ATCC 204508 / S288c) OX=559292 GN=NFS1 PE=1 SV=2
PlainYeastBread.csv	BRL_F2DB07	10219000000	12334000000	7478600000	Predicted protein OS=Hordeum vulgare subsp. vulgare OX=112509 PE=2 SV=1
PlainYeastBread.csv	WHT_A0A1D5UUP9	10219000000	12334000000	7478600000	Genome assembly chromosome: II OS=Triticum aestivum OX=4565 GN=CAMPLR22A2D_LOCUS1333 PE=3 SV=1
PlainYeastBread.csv	WHT_A0A3B6NX38	3746800000			Glutathione reductase OS=Triticum aestivum OX=4565 GN=CFC21_085252 PE=3 SV=1
PlainYeastBread.csv	WHT_A0A3B6PTD3	3746800000			GRase OS=Triticum aestivum OX=4565 GN=CFC21_026350 PE=3 SV=1
PlainYeastBread.csv	WHT_A0A1D5UJW2	3353100000	19875000000		coproporphyrinogen oxidase OS=Triticum aestivum OX=4565 GN=CAMPLR22A2D_LOCUS4271 PE=3 SV=1
PlainYeastBread.csv	BRL_F2DIZ2	3353100000	19875000000		coproporphyrinogen oxidase OS=Hordeum vulgare subsp. vulgare OX=112509 PE=2 SV=1
PlainYeastBread.csv	WHT_A0A3B6IQN9	422800000	15249000000	682100000	Peptidase A1 domain-containing protein OS=Triticum aestivum OX=4565 GN=CFC21_056921 PE=3 SV=1
PlainYeastBread.csv	WHT_A0A3B6GSZ4		5644900000	413900000	Dehydrin OS=Triticum aestivum OX=4565 GN=CFC21_047698 PE=3 SV=1
PlainYeastBread.csv	WHT_D0PRB6		5644900000	413900000	Dehydrin OS=Triticum aestivum OX=4565 GN=CFC21_035833 PE=2 SV=1
PlainYeastBread.csv	WHT_W5D5Z6		5644900000	413900000	Dehydrin OS=Triticum aestivum OX=4565 GN=CFC21_041809 PE=3 SV=1
PlainYeastBread.csv	SOY_I1K3R6		20223000000		Methanethiol oxidase OS=Glycine max OX=3847 GN=100813286 PE=3 SV=1
PlainYeastBread.csv	WHT_A0A3B6HS77	5187400000	677100000	552500000	GST N-terminal domain-containing protein OS=Triticum aestivum OX=4565 GN=CFC21_051839 PE=4 SV=1
PlainYeastBread.csv	WHT_A0A3B6EN15	1374900000	11917000000	3661900000	RRM domain-containing protein OS=Triticum aestivum OX=4565 GN=CFC21_037549 PE=4 SV=1
PlainYeastBread.csv	WHT_A0A3B6KGS2	762190000	5560700000	6792700000	H15 domain-containing protein OS=Triticum aestivum OX=4565 PE=4 SV=1
PlainYeastBread.csv	WHT_A0A3B6TNY0	0	2146600000		Pyruvate dehydrogenase E1 component subunit alpha OS=Triticum aestivum OX=4565 GN=CFC21_108402 PE=4 SV=1
PlainYeastBread.csv	BRL_F2DKD7	0	2146600000		Pyruvate dehydrogenase E1 component subunit alpha OS=Hordeum vulgare subsp. vulgare OX=112509 PE=2 SV=1
PlainYeastBread.csv	WHT_A0A3B6SBK4	0	2146600000		Dehydrogenase E1 component domain-containing protein OS=Triticum aestivum OX=4565 GN=CFC21_102032 PE=4 SV=1
PlainYeastBread.csv	CS_Q08179		3055900000		Mitochondrial distribution and morphology protein 38 OS=Saccharomyces cerevisiae (strain ATCC 204508 / S288c) OX=559292 GN=MDM38 PE=1 SV=1
PlainYeastBread.csv	WHT_A0A3B6HZH0	2083900000			Peptidase A1 domain-containing protein OS=Triticum aestivum OX=4565 GN=CFC21_053095 PE=3 SV=1
PlainYeastBread.csv	BRL_A0A8I7BBK0	2083900000			Peptidase A1 domain-containing protein OS=Hordeum vulgare subsp. vulgare OX=112509 PE=3 SV=1
PlainYeastBread.csv	WHT_A0A3B6IP73	2083900000			Peptidase A1 domain-containing protein OS=Triticum aestivum OX=4565 GN=CFC21_056790 PE=3 SV=1
PlainYeastBread.csv	WHT_A0A3B6I438		0	0	N-acetyltransferase domain-containing protein OS=Triticum aestivum OX=4565 GN=CFC21_054471 PE=4 SV=1
PlainYeastBread.csv	WHT_A0A3B6AYU2	10361000000	7840200000	6346800000	COP9 signalosome complex subunit 8 OS=Triticum aestivum OX=4565 PE=3 SV=1
PlainYeastBread.csv	WHT_A0A3B6ETX1	3158200000			C3H1-type domain-containing protein OS=Triticum aestivum OX=4565 PE=4 SV=1
PlainYeastBread.csv	CS_P07172	0			Histidinol-phosphate aminotransferase OS=Saccharomyces cerevisiae (strain ATCC 204508 / S288c) OX=559292 GN=HIS5 PE=1 SV=2
PlainYeastBread.csv	WHT_A0A3B5Y345	0	0		Aminotransferase class I/classII domain-containing protein OS=Triticum aestivum OX=4565 PE=3 SV=1
PlainYeastBread.csv	WHT_A0A3B6CH13	7332800000			3-isopropylmalate dehydrogenase OS=Triticum aestivum OX=4565 GN=CFC21_026719 PE=3 SV=1
PlainYeastBread.csv	BRL_A0A8I7B4C5	7332800000			3-isopropylmalate dehydrogenase OS=Hordeum vulgare subsp. vulgare OX=112509 PE=3 SV=1
PlainYeastBread.csv	BRL_F2EGM1	16075000000	0	42348000000	Plant antimicrobial peptide domain-containing protein OS=Hordeum vulgare subsp. vulgare OX=112509 PE=1 SV=1
PlainYeastBread.csv	SOY_I1NFL5	4272400000	525600000	5503300000	J domain-containing protein OS=Glycine max OX=3847 GN=100777978 PE=4 SV=1
PlainYeastBread.csv	WHT_A0A3B6DLV0		7838100000		DUF6598 domain-containing protein OS=Triticum aestivum OX=4565 GN=CFC21_032129 PE=4 SV=1
PlainYeastBread.csv	BRL_F2CWU8		17673000000		Predicted protein OS=Hordeum vulgare subsp. vulgare OX=112509 PE=2 SV=1
PlainYeastBread.csv	SOY_A0A0R0I4F6	0		68720000	Uncharacterized protein OS=Glycine max OX=3847 GN=GLYMA_10G155300 PE=4 SV=1
PlainYeastBread.csv	BRL_A0A8I6XGT4	0		0	Uncharacterized protein OS=Hordeum vulgare subsp. vulgare OX=112509 PE=3 SV=1
PlainYeastBread.csv	BRL_A0A8I6XR40	12938000000	0		Myb-like domain-containing protein OS=Hordeum vulgare subsp. vulgare OX=112509 PE=4 SV=1
DairyYogurt.csv	COW_P00711	124740000000000	411440000000000	922330000000000	Alpha-lactalbumin OS=Bos taurus OX=9913 GN=LALBA PE=1 SV=2
DairyYogurt.csv	CRAP_LALBA	124740000000000	411440000000000	922330000000000	CRAP_LALBA_BOVIN
DairyYogurt.csv	COW_A0A3Q1LYQ2	41301000000	83966000000000	925000000000	Alpha-lactalbumin OS=Bos taurus OX=9913 GN=LALBA PE=3 SV=1
DairyYogurt.csv	CRAP_CASB	713720000000000	468290000000000	911330000000000	CRAP_CASB_BOVIN
DairyYogurt.csv	COW_A0A140T897	20192000000000	117430000000000	89517000000000	Albumin OS=Bos taurus OX=9913 GN=ALB PE=4 SV=1
DairyYogurt.csv	CRAP_ALBU	20192000000000	117430000000000	89481000000000	CRAP_ALBU_BOVIN
DairyYogurt.csv	CRAP_CAS2	94520000000000	1.6537e+15	1.3934e+15	CRAP_CAS2_BOVIN
DairyYogurt.csv	COW_P02663	94520000000000	1.6537e+15	1.3934e+15	Alpha-S2-casein OS=Bos taurus OX=9913 GN=CSN1S2 PE=1 SV=2
DairyYogurt.csv	COW_P24627	14985000000000	80978000000000	77022000000000	Lactotransferrin OS=Bos taurus OX=9913 GN=LTF PE=1 SV=2
DairyYogurt.csv	CRAP_CAS1	4.5104e+15	314900000000000	434800000000000	CRAP_CAS1_BOVIN
DairyYogurt.csv	COW_P02662	4.5104e+15	314900000000000	434800000000000	Alpha-S1-casein OS=Bos taurus OX=9913 GN=CSN1S1 PE=1 SV=2
DairyYogurt.csv	LBP_Q03CX8		0	5697100000	Permease of the major facilitator superfamily OS=Lacticaseibacillus paracasei (strain ATCC 334 / BCRC 17002 / CCUG 31169 / CIP 107868 / KCTC 3260 / NRRL B-441) OX=321967 GN=LSEI_0080 PE=3 SV=1
DairyYogurt.csv	CRAP_CASK	1.8139e+15	717520000000000	1.2393e+15	CRAP_CASK_BOVIN
DairyYogurt.csv	COW_P02668	1.8139e+15	717520000000000	1.2393e+15	Kappa-casein OS=Bos taurus OX=9913 GN=CSN3 PE=1 SV=1
DairyYogurt.csv	COW_A0A3Q1LW91	6760300000000	20087000000000	12626000000000	Xanthine dehydrogenase/oxidase OS=Bos taurus OX=9913 GN=XDH PE=3 SV=1
DairyYogurt.csv	STRT_Q5M670	18177000000000	27799000000000	23242000000000	Chaperonin GroEL OS=Streptococcus thermophilus (strain ATCC BAA-250 / LMG 18311) OX=264199 GN=groEL PE=3 SV=1
DairyYogurt.csv	COW_P02754	390000000000	224510000000000	795670000000000	Beta-lactoglobulin OS=Bos taurus OX=9913 GN=LGB PE=1 SV=3
DairyYogurt.csv	COW_A0A452DHW7	42716000000000	53816000000000	30369000000000	Beta-casein OS=Bos taurus OX=9913 GN=CSN2 PE=1 SV=1
DairyYogurt.csv	COW_Q2UVX4	6782800000000	11478000000000	6488200000000	Complement C3 OS=Bos taurus OX=9913 GN=C3 PE=1 SV=2
DairyYogurt.csv	COW_P81265	6145800000000	24747000000000	23357000000000	Polymeric immunoglobulin receptor OS=Bos taurus OX=9913 GN=PIGR PE=2 SV=1
DairyYogurt.csv	COW_A0A3Q1M3L6	14006000000000	72306000000000	48962000000000	Ig-like domain-containing protein OS=Bos taurus OX=9913 PE=1 SV=1
DairyYogurt.csv	COW_Q29443	1112400000000	5390200000000	4536300000000	Serotransferrin OS=Bos taurus OX=9913 GN=TF PE=2 SV=1
DairyYogurt.csv	CRAP_TRFL		192480000000	60495000000	CRAP_TRFL_HUMAN
DairyYogurt.csv	COW_P18892	4752500000000	15343000000000	11354000000000	Butyrophilin subfamily 1 member A1 OS=Bos taurus OX=9913 GN=BTN1A1 PE=1 SV=2
DairyYogurt.csv	STRT_Q5M324	3037900000000	573200000000	4273200000000	ATP-dependent proteinase ATP-binding subunit OS=Streptococcus thermophilus (strain ATCC BAA-250 / LMG 18311) OX=264199 GN=clpL PE=4 SV=1
DairyYogurt.csv	COW_F1MXX6	9582200000000	18614000000000	12204000000000	Milk fat globule EGF and factor V/VIII domain containing OS=Bos taurus OX=9913 GN=MFGE8 PE=4 SV=1
DairyYogurt.csv	STRT_Q5M561	4468800000000	939600000000	8534600000000	Enolase OS=Streptococcus thermophilus (strain ATCC BAA-250 / LMG 18311) OX=264199 GN=eno PE=3 SV=1
DairyYogurt.csv	STRT_Q5M2M7	5589900000000	11176000000000	129000000000	Glyceraldehyde-3-phosphate dehydrogenase OS=Streptococcus thermophilus (strain ATCC BAA-250 / LMG 18311) OX=264199 GN=gapA1 PE=3 SV=1
DairyYogurt.csv	STRT_Q5M5I8	63800000000	7391100000000	4917600000000	Elongation factor Tu OS=Streptococcus thermophilus (strain ATCC BAA-250 / LMG 18311) OX=264199 GN=tuf PE=3 SV=1
DairyYogurt.csv	COW_F1N647	467610000000	1452200000000	582410000000	Fatty acid synthase OS=Bos taurus OX=9913 GN=FASN PE=1 SV=3
DairyYogurt.csv	STRT_Q5M6D1	2014400000000	4160400000000	4766200000000	Chaperone protein DnaK OS=Streptococcus thermophilus (strain ATCC BAA-250 / LMG 18311) OX=264199 GN=dnaK PE=3 SV=1
DairyYogurt.csv	COW_P80025	4313300000000	12326000000000	9988800000000	Lactoperoxidase OS=Bos taurus OX=9913 GN=LPO PE=1 SV=1
[truncated: 23,521 more rows]
